# Supplementary material
Source: PubMed Central journal article supplement (PMC3031412)
Supplement: blood-2010-06-290536_1.pdf [file blood-2010-06-290536_1.pdf]

## **Cancer and Leukemia Group B institutions, principal investigators, and cytogeneticists who participated in this study**

Wake Forest University School of Medicine, Winston-Salem, NC: David D. Hurd, P. Nagesh Rao, Wendy L. Flejter and Mark J. Pettenati (grant no. CA03927); The Ohio State University Medical Center, Columbus, OH: Clara D. Bloomfield, Karl S. Theil and Nyla A. Heerema (grant no. CA77658); North Shore–Long Island Jewish Health System, Manhasset, NY: Daniel R. Budman and Prasad R. K. Koduru (grant no. CA35279); University of Iowa Hospitals, Iowa City, IA: Gerald H. Clamon and Shivanand R. Patil (grant no. CA47642); Duke University Medical Center, Durham, NC: Jeffrey Crawford, Sandra H. Bigner, Mazin B. Qumsiyeh, John Eyre and Barbara K. Goodman (grant no. CA47577); Roswell Park Cancer Institute, Buffalo, NY: Ellis G. Levine and AnneMarie W. Block (grant no. CA02599); University of Chicago Medical Center, Chicago, IL: Hedy L. Kindler, Diane Roulston, Yanming Zhang and Michelle M. Le Beau (grant no. CA41287); Ft. Wayne Medical Oncology/Hematology, Ft. Wayne, IN: Sreenivasa Nattam and Patricia I. Bader; Minneapolis VA Medical Center, Minneapolis, MN: Vicki A. Morrison and Sugandhi A. Tharapel (grant no. CA47555); University of Maryland Cancer Center, Baltimore, MD: Martin Edelman, Joseph R. Testa, Judith Stamberg and Yi Ning (grant no. CA31983); Dana Farber Cancer Institute, Boston, MA: Harold J. Burstein, Leonard L. Atkins, Paola Dal Cin and Cynthia C. Morton (grant no. CA32291); Dartmouth Medical School, Lebanon, NH: Konstantin Dragnev, Doris H. Wurster-Hill and Thuluvancheri K. Mohandas (grant no. CA04326); Eastern Maine Medical Center, Bangor, ME: Harvey M. Segal and Laurent J. Beauregard (grant no. CA35406); Rhode Island Hospital, Providence, RI: William Sikov, Teresita Padre-Mendoza, Hon Fong L. Mark and Shelly L. Kerman (grant no. CA08025); SUNY Upstate Medical University, Syracuse, NY: Stephen L. Graziano, Larry Gordon and Constance K. Stein (grant no. CA21060); Long Island Jewish Medical Center CCOP, Lake Success, NY: Kanti R. Rai and Prasad R. K. Koduru (grant no. CA11028); Vermont Cancer Center, Burlington, VT: Steven M. Grunberg, Elizabeth F. Allen and Mary Tang (grant no. CA77406); University of Missouri/Ellis Fischel Cancer Center, Columbia, MO: Michael C. Perry and Tim H. Huang (grant no. CA12046); Mount Sinai School of Medicine, New York, NY: Lewis R. Silverman and Vesna Najfeld (grant no. CA04457); Weill Medical College of Cornell University, New York, NY: John Leonard and Ram S. Verma (grant no. CA07968); Washington University School of Medicine, St. Louis, MO: Nancy L. Bartlett, Eric C. Crawford and Jaime Garcia-Heras (grant no. CA77440); University of Illinois at Chicago: David J. Peace, Kathleen E. Richkind and Maureen M. McCorquodale (grant no. CA74811); University of Nebraska Medical Center, Omaha, NE: Anne Kessinger and Warren G. Sanger (grant no. CA77298); Walter Reed Army Medical Center, Washington, DC: Brendan M. Weiss and Rawatmal B. Surana (grant no. CA26806); Massachusetts General Hospital, Boston, MA: Jeffrey W. Clark, Paola Dal Cin and Cynthia C. Morton (grant no. CA12449); McGill Department of Oncology, Montreal, Quebec: J. L. Hutchison and Jacqueline Emond (grant no. CA31809); University of Minnesota, Minneapolis, MN: Bruce A. Peterson and Diane C. Arthur (grant no. CA16450); Medical University of South Carolina, Charleston, SC: Mark R. Green and Dayna J. Wolff (grant no. CA03927); University of North Carolina, Chapel Hill, NC: Thomas C. Shea and Kathleen W. Rao (grant no. CA47559); University of Puerto Rico School of Medicine, San Juan, PR: Eileen I. Pacheco, Leonard L. Atkins and Cynthia C. Morton; University of California at San Diego: Barbara A. Parker and Renée Bernstein (grant no. CA11789); Western Pennsylvania Hospital, Pittsburgh, PA: John Lister and Gerard R. Diggans.

### **Treatment protocols**

Patients were treated on one of the following intensive cytarabine/daunorubicin-based Cancer and Leukemia Group B (CALGB) frontline treatment protocols: 8525 (n=17),<sup>1</sup> 8923 (n=11),<sup>2</sup> 9420 (n=5),<sup>3</sup> 9720 (n=65),<sup>4,5</sup> or 10201 (n=60).<sup>6</sup> Among these protocols, CALGB 9420, 9720, and 10201 included investigational agents other than chemotherapy. CALGB 9720<sup>4,5</sup> was initiated as a phase III trial in untreated acute myeloid leukemia (AML) patients 60 years and older evaluating multidrug resistance (MDR) modulation by valspodar (PSC-833) during induction and consolidation therapy with cytarabine, daunorubicin, and etoposide. The valspodar (PSC-833) arm was closed after only random assignment of 120 patients because of excessive early deaths. Enrollment on this protocol continued on the chemotherapy-only control arm. CALGB 10201<sup>6</sup> evaluated the *BCL2* antisense, oblimersen sodium (Genasense; G3139) administered with induction and consolidation chemotherapy; preliminary results showed no impact of the antisense on outcome. CALGB 9420<sup>3</sup> and CALGB 9720<sup>4,5</sup> evaluated a subcutaneous IL-2 regimen in older AML patients as maintenance therapy, which was demonstrated to induce no clear benefit. Per the protocols, patients enrolled on these studies did not receive stem cell transplantation in first complete remission (CR).

### **Sample Preparation**

Patients enrolled on the aforementioned treatment protocols were also enrolled on the companion protocols CALGB 9665 (Leukemia Tissue Bank) and CALGB 20202 [molecular studies in AML], and gave informed consent for pretreatment marrow and blood collection and their research use in accordance with the Declaration of Helsinki. Mononuclear cells from pretreatment blood were enriched by Ficoll-Hypaque gradient and cryopreserved in liquid nitrogen until they were thawed at 37°C for the analysis. DNA and total RNA sample extraction and quality control was performed as reported previously.<sup>7-10</sup> Two micrograms of total RNA were used to derive complementary DNA.

### **Definition of clinical end points**

CR was defined as recovery of morphologically normal bone marrow and blood counts (ie, neutrophils  $\geq 1,500/\mu\text{l}$  and platelets  $>100,000/\mu\text{l}$ ), and no circulating leukemic blasts or evidence of extramedullary leukemia. Disease-free survival (DFS) was measured from the date of CR until date of relapse or death, regardless of cause. Overall survival (OS) was measured from the date on study until date of death. Patients alive at last follow-up were censored for both DFS and OS.

### **Multivariable models**

Multivariable logistic regression models were constructed to analyze factors related to the probability of achieving CR using a limited backwards selection procedure. Variables in addition to *BAALC* and *ERG* expression that were considered for univariable analyses were age, sex, race, hemoglobin, platelet count, white blood count (WBC), *NPM1* (mutated vs wild-type), *FLT3*-ITD (present vs absent), *FLT3*-TKD (present vs absent), and *CEBPA* (mutated vs wild-type). Variables considered for inclusion in the logistic models were those significant at  $\alpha=.20$  from the univariable models. Variables remaining in the final models were significant at  $\alpha=.05$ .

Multivariable proportional hazards models were constructed for DFS and OS to evaluate the impact of *BAALC* and *ERG* expression by adjusting for other variables using a limited backwards selection procedure. Variables in addition to *BAALC* and *ERG* expression that were considered

for univariable analyses were age, sex, race, hemoglobin, platelet count, WBC, *NPM1* (mutated v wild-type), *FLT3*-ITD (present v absent), *FLT3*-TKD (present v absent), *CEBPA* (mutated v wild-type) and *WT1* (mutated v wild-type). Variables significant at  $\alpha=.20$  from the univariable analyses were considered for multivariable analyses. The proportional hazards assumption was checked for each variable individually. If the proportional hazards assumption was not met for a particular variable, then an artificial time dependent covariate was included in all models that contained that variable.<sup>11</sup>

### **Best model selection**

Because we recently reported a strong prognostic impact of *NPM1* mutations on CR rates, DFS and OS in older cytogenetically normal AML patients,<sup>12</sup> it was of particular interest to us to investigate the relationship of *NPM1* mutation status with *BAALC* and *ERG* expresser status. Consequently we compared different multivariable models for CR, DFS and OS.

The Akaike information criterion (AIC) is a model selection tool that aids in choosing between competing statistical models by taking into consideration the goodness-of-fit and complexity of the model. The AIC score was calculated for competing models estimating CR attainment, DFS, and OS. Among the AIC scores calculated for each model, the lowest score is indicative of the best model, irrespective of the amount of difference in the numerical values.

For the achievement of CR, the best Akaike score had the model reported in the main text of this article, consisting of *BAALC* expression, WBC and *NPM1* mutation status, whereas a model that included only *NPM1* mutation status and WBC had a higher (ie, worse) score (Supplemental Table S1a). For DFS, the model including *BAALC* expression, *FLT3*-ITD and age was best, while both the model including *NPM1* mutation status in addition to the aforementioned variables and the model including *NPM1* mutation status, *FLT3*-ITD and WBC, but not *BAALC* expression, were worse (Supplemental Table S1b). For OS, the model including only *BAALC* and *ERG* expression status was better than models including *BAALC* and *ERG* expression and *NPM1* mutation status, or *NPM1* mutation status, *FLT3*-ITD and WBC (Supplemental Table S1c).

### **Outcome and WBC**

336 *de novo* CN-AML patients, 60 years or older, enrolled on CALGB protocols 8525, 8923, 9420, 9720, 10201. A subset of 158 cases had adequate material available to be included in our study. The subset of studied patients had higher CR rates, when compared to the remaining 178 cases without adequate material (70% vs. 58%,  $P=.02$ ). There was no significant difference observed for DFS ( $P=.57$ ) and OS ( $P=.20$ ). Furthermore the WBC was significantly higher in the studied cases compared to the cases not included in our study ( $P<.001$ ). This is a result of availability of adequate material for reliable molecular studies in patients with higher WBCs. To rule out any potential confounding effect due to this fact, we evaluated WBC in all final multivariable models that did not include WBC. WBC was not significant in either the DFS ( $P=.47$ ) or in the OS ( $P=.42$ ) models. The estimates and significance of our main variables, *BAALC* and *ERG* expression, did not change.

### **Gene- and microRNA-expression profiling**

For gene-expression microarrays, summary measures of gene expression were computed for each probe set using the robust multichip average (RMA) method, which incorporates quantile normalization of arrays. Expression values were logged (base 2) before analysis. A filtering step was performed to remove probe sets that did not display significant variation in expression across arrays. In this procedure, a chi-square test was used to test whether the observed variance in expression of a probe set was significantly larger than the median observed variance in expression for all probe sets using  $\alpha=.01$  as the significance level. A total of 24,437 probe sets passed the filtering criterion and were examined in the derivation of signatures. A comparison of gene expression was made between low and high *BAALC* expression and low and high *ERG* expression respectively, using a univariable significance level of .001.

For microRNA microarrays, signal intensities were calculated for each spot making an adjustment for local background. Intensities were log-transformed and log-intensities from replicate spots were averaged. Quantile normalization was performed on arrays using all human and mouse microRNA probes represented on the array. For each microRNA probe, an adjustment was made for batch effects (ie, differences in expression related to the batch in which arrays were hybridized). Further analysis was limited to 895 unique human probes. A comparison of microRNA-expression was made between low and high *BAALC* expression and low and high *ERG* expression respectively, using a univariable significance level of .005.

Analyses were performed using BRB-ArrayTools Version 3.8.0 Beta\_1 Release developed by Dr. Richard Simon and Amy Peng Lam. For *in silico* target prediction of microRNAs, the online applications miRBase Targets Version 5 and Targetscan Release 5.0 were used.

## REFERENCES

1. Mayer RJ, Davis RB, Schiffer CA, et al. Intensive postremission chemotherapy in adults with acute myeloid leukemia. *N Engl J Med*. 1994;331(14):896–903.
2. Stone RM, Berg DT, George SL, et al. Granulocyte-macrophage colony-stimulating factor after initial chemotherapy for elderly patients with primary acute myelogenous leukemia. *N Engl J Med*. 1995;332(25):1671–1677.
3. Lee EJ, George SL, Caligiuri M, et al. Parallel phase I studies of daunorubicin given with cytarabine and etoposide with or without the multidrug resistance modulator PSC-833 in previously untreated patients 60 years of age or older with acute myeloid leukemia: results of Cancer and Leukemia Group B study 9420. *J Clin Oncol*. 1999;17(9):2831–2839.
4. Baer MR, George SL, Dodge RK, et al. Phase 3 study of the multidrug resistance modulator PSC-833 in previously untreated patients 60 years of age and older with acute myeloid leukemia: Cancer and Leukemia Group B study 9720. *Blood*. 2002;100(4):1224–1232.
5. Baer MR, George SL, Caligiuri MA, et al. Low-dose interleukin-2 immunotherapy does not improve outcome of patients age 60 years and older with acute myeloid leukemia in first complete remission: Cancer and Leukemia Group B study 9720. *J Clin Oncol*. 2008;26(30):4934–4939.
6. Marcucci G, Moser B, Blum W, et al. A phase III randomized trial of intensive induction and consolidation chemotherapy  $\pm$  oblimersen, a pro-apoptotic Bcl-2 antisense oligonucleotide in untreated acute myeloid leukemia patients  $>60$  years old [abstract]. *J Clin Oncol*. 2007;25(18s, suppl):360s. Abstract 7012.
7. Baldus CD, Tanner SM, Ruppert AS, et al. *BAALC* expression predicts clinical outcome of de novo acute myeloid leukemia patients with normal cytogenetics: a Cancer and Leukemia Group B study. *Blood*. 2003;102(5):1613–1618.
8. Langer C, Radmacher MD, Ruppert AS, et al. High *BAALC* expression associates with other molecular prognostic markers, poor outcome, and a distinct gene-expression signature in cytogenetically normal patients younger than 60 years with acute myeloid leukemia: a Cancer and Leukemia Group B (CALGB) study. *Blood*. 2008;111(11):5371–5379.
9. Marcucci G, Baldus CD, Ruppert AS, et al. Overexpression of the ETS-related gene, *ERG*, predicts a worse outcome in acute myeloid leukemia with normal karyotype: a Cancer and Leukemia Group B study. *J Clin Oncol*. 2005;23(36):9234–9242.
10. Marcucci G, Maharry K, Whitman SP, et al. High expression levels of the ETS-related gene, *ERG*, predict adverse outcome and improve molecular risk-based classification of cytogenetically normal acute myeloid leukemia: a Cancer and Leukemia Group B study. *J Clin Oncol*. 2007;25(22):3337–3343.
11. Klein JP, Moeschberger MP. *Survival Analysis: Techniques for Censored and Truncated Data*. New York, NY: Springer-Verlag; 1997.
12. Becker H, Marcucci G, Maharry K, et al. Favorable prognostic impact of *NPM1* mutations in older patients with cytogenetically normal de novo acute myeloid leukemia and associated gene- and microRNA-expression signatures: a Cancer and Leukemia Group B study. *J Clin Oncol*. 2010;28(4):596–604.

**Table S1a. Akaike information criterion (AIC) of CR achievement models**

| Model                   | Log likelihood (LL) | No. of Covariates (c) | No. of Ancillary Parameters (a) | AIC*  |
|-------------------------|---------------------|-----------------------|---------------------------------|-------|
| <i>BAALC, NPM1, WBC</i> | -82.14              | 3                     | 1                               | 172.3 |
| <i>NPM1, WBC</i>        | -88.27              | 2                     | 1                               | 182.5 |

\*AIC=-2LL+2(c+a)

**Table S1b. Akaike information criterion (AIC) of DFS models**

| Model                             | Log likelihood (LL) | No. of Covariates (c) | No. of Ancillary Parameters (a) | AIC*  |
|-----------------------------------|---------------------|-----------------------|---------------------------------|-------|
| <i>BAALC, FLT3-ITD, Age</i>       | -374.06             | 3                     | 1                               | 756.1 |
| <i>BAALC, FLT3-ITD, Age, NPM1</i> | -373.65             | 4                     | 1                               | 757.3 |
| <i>NPM1, FLT3-ITD, WBC</i>        | -377.06             | 3                     | 1                               | 762.1 |

\*AIC=-2LL+2(c+a)

**Table S1c. Akaike information criterion (AIC) of OS models**

| Model                      | Log likelihood (LL) | No. of Covariates (c) | No. of Ancillary Parameters (a) | AIC*   |
|----------------------------|---------------------|-----------------------|---------------------------------|--------|
| <i>BAALC, ERG</i>          | -577.52             | 2                     | 1                               | 1161.0 |
| <i>BAALC, ERG, NPM1</i>    | -577.06             | 3                     | 1                               | 1162.1 |
| <i>NPM1, FLT3-ITD, WBC</i> | -585.99             | 3                     | 1                               | 1178.0 |

\*AIC=-2LL+2(c+a)

**Note:** Among the AIC scores calculated for each model, the lowest score is indicative of the best model, irrespective of the amount of difference in the numerical values.

**Table S2. 482 probe sets associated with low *BAALC* expression in older CN-AML patients**

| Probe set          | gene symbol | Fold-change:<br>Low/High | P-value  |
|--------------------|-------------|--------------------------|----------|
| <u>204304_s_at</u> | PROM1       | 0.1640                   | 4.54E-05 |
| <u>218899_s_at</u> | BAALC       | 0.1672                   | 1.00E-07 |
| <u>222780_s_at</u> | BAALC       | 0.1717                   | 1.00E-07 |
| <u>219789_at</u>   | NPR3        | 0.1843                   | 3.00E-07 |
| <u>1566363_at</u>  | DNTT        | 0.1958                   | 0.000617 |
| <u>210487_at</u>   | DNTT        | 0.1998                   | 0.000598 |
| <u>205330_at</u>   | MN1         | 0.2030                   | 2.00E-07 |
| <u>209543_s_at</u> | CD34        | 0.2037                   | < 1e-07  |
| <u>219054_at</u>   | C5orf23     | 0.2189                   | 1.00E-07 |
| <u>1562433_at</u>  | FLJ10489    | 0.2673                   | 7.95E-05 |
| <u>218589_at</u>   | LPAR6       | 0.2679                   | 0.000361 |
| <u>211597_s_at</u> | HOPX        | 0.2842                   | 0.000635 |
| <u>241133_at</u>   | TRBV27      | 0.2843                   | 0.000653 |
| <u>210755_at</u>   | HGF         | 0.2868                   | 0.000218 |
| <u>204439_at</u>   | IFI44L      | 0.2883                   | 0.000582 |
| <u>229390_at</u>   | FAM26F      | 0.3073                   | 6.20E-06 |
| <u>214953_s_at</u> | APP         | 0.3108                   | 0.000144 |
| <u>207655_s_at</u> | BLNK        | 0.3141                   | 0.000556 |
| <u>226517_at</u>   | BCAT1       | 0.3169                   | 0.000441 |
| <u>209583_s_at</u> | CD200       | 0.3169                   | 1.06E-05 |
| <u>202283_at</u>   | SERPINF1    | 0.3243                   | 0.000144 |
| <u>200665_s_at</u> | SPARC       | 0.3266                   | 1.05E-05 |
| <u>209576_at</u>   | GNAI1       | 0.3271                   | 0.000122 |
| <u>227692_at</u>   | GNAI1       | 0.3351                   | 4.79E-05 |
| <u>227198_at</u>   | AFF3        | 0.3362                   | 4.39E-05 |
| <u>211991_s_at</u> | HLA-DPA1    | 0.3386                   | 0.000342 |
| <u>230896_at</u>   | BEND4       | 0.3467                   | 0.00038  |
| <u>213506_at</u>   | F2RL1       | 0.3474                   | 7.20E-05 |
| <u>211990_at</u>   | HLA-DPA1    | 0.3506                   | 0.000115 |
| <u>225285_at</u>   | BCAT1       | 0.3610                   | 0.000633 |
| <u>224428_s_at</u> | CDCA7       | 0.3754                   | 0.00063  |
| <u>210997_at</u>   | HGF         | 0.3768                   | 0.000148 |
| <u>219790_s_at</u> | NPR3        | 0.3813                   | 5.90E-06 |
| <u>209723_at</u>   | SERPINB9    | 0.3854                   | 0.000863 |
| <u>227923_at</u>   | SHANK3      | 0.3905                   | 0.00013  |
| <u>209993_at</u>   | ABCB1       | 0.3918                   | 0.000319 |
| <u>203987_at</u>   | FZD6        | 0.4008                   | 0.000408 |
| <u>224579_at</u>   | SLC38A1     | 0.4010                   | 4.88E-05 |
| <u>214452_at</u>   | BCAT1       | 0.4037                   | 0.000579 |
| <u>242064_at</u>   | SDK2        | 0.4040                   | 0.000752 |
| <u>205984_at</u>   | CRHBP       | 0.4044                   | 0.000306 |
| <u>219648_at</u>   | MREG        | 0.4050                   | 0.000558 |
| <u>221491_x_at</u> |             | 0.4053                   | 8.37E-05 |
| <u>217979_at</u>   | TSPAN13     | 0.4068                   | 8.77E-05 |
| <u>211474_s_at</u> | SERPINB6    | 0.4076                   | 0.000778 |

| Probe set          | gene symbol | Fold-change:<br>Low/High | P-value  |
|--------------------|-------------|--------------------------|----------|
| <u>201137 s at</u> | HLA-DPB1    | 0.4082                   | 0.000327 |
| <u>202242 at</u>   | TSPAN7      | 0.4102                   | 0.000293 |
| <u>208116 s at</u> | MAN1A1      | 0.4106                   | 1.30E-06 |
| <u>229391 s at</u> | FAM26F      | 0.4113                   | 5.90E-06 |
| <u>226878 at</u>   | HLA-DOA     | 0.4157                   | 6.18E-05 |
| <u>218237 s at</u> | SLC38A1     | 0.4213                   | 1.62E-05 |
| <u>211675 s at</u> | MDFIC       | 0.4225                   | 0.000134 |
| <u>206233 at</u>   | B4GALT6     | 0.4296                   | 4.10E-06 |
| <u>214022 s at</u> | IFITM1      | 0.4299                   | 0.000504 |
| <u>201601 x at</u> | IFITM1      | 0.4312                   | 0.000212 |
| <u>235333 at</u>   | B4GALT6     | 0.4334                   | 0.000184 |
| <u>209199 s at</u> | MEF2C       | 0.4386                   | 0.00033  |
| <u>228831 s at</u> | GNG7        | 0.4391                   | 5.00E-07 |
| <u>213241 at</u>   | PLXNC1      | 0.4393                   | 0.000193 |
| <u>223125 s at</u> | C1orf21     | 0.4396                   | 0.000481 |
| <u>209200 at</u>   | MEF2C       | 0.4518                   | 0.000599 |
| <u>221760 at</u>   | MAN1A1      | 0.4554                   | 1.38E-05 |
| <u>209795 at</u>   | CD69        | 0.4558                   | 0.000485 |
| <u>227108 at</u>   | STARD9      | 0.4610                   | 0.000171 |
| <u>206232 s at</u> | B4GALT6     | 0.4637                   | 3.30E-06 |
| <u>209994 s at</u> |             | 0.4652                   | 0.000294 |
| <u>229543 at</u>   | FAM26F      | 0.4752                   | 4.09E-05 |
| <u>212607 at</u>   | AKT3        | 0.4757                   | 0.000113 |
| <u>204972 at</u>   | OAS2        | 0.4775                   | 0.000338 |
| <u>205101 at</u>   | CIITA       | 0.4781                   | 3.20E-06 |
| <u>217478 s at</u> | HLA-DMA     | 0.4798                   | 0.000565 |
| <u>216766 at</u>   |             | 0.4808                   | 2.30E-06 |
| <u>210192 at</u>   | ATP8A1      | 0.4828                   | 7.10E-05 |
| <u>221004 s at</u> | ITM2C       | 0.4838                   | 3.76E-05 |
| <u>213618 at</u>   | ARAP2       | 0.4883                   | 0.00054  |
| <u>225105 at</u>   | C12orf75    | 0.4885                   | 0.00054  |
| <u>204896 s at</u> |             | 0.4887                   | 0.000104 |
| <u>208965 s at</u> | IFI16       | 0.4923                   | 3.71E-05 |
| <u>209582 s at</u> | CD200       | 0.4927                   | 0.000518 |
| <u>230481 at</u>   | ACY3        | 0.4943                   | 0.000354 |
| <u>213106 at</u>   | ATP8A1      | 0.4953                   | 8.69E-05 |
| <u>1553183 at</u>  | UMODL1      | 0.5015                   | 0.000282 |
| <u>227875 at</u>   | KLHL13      | 0.5028                   | 0.00073  |
| <u>208966 x at</u> | IFI16       | 0.5032                   | 6.51E-05 |
| <u>209574 s at</u> | C18orf1     | 0.5042                   | 8.10E-05 |
| <u>206332 s at</u> | IFI16       | 0.5110                   | 0.000121 |
| <u>214255 at</u>   | ATP10A      | 0.5127                   | 0.000136 |
| <u>226018 at</u>   | C7orf41     | 0.5156                   | 0.000492 |
| <u>212573 at</u>   | ENDOD1      | 0.5203                   | 0.000105 |
| <u>209933 s at</u> | CD300A      | 0.5223                   | 0.000839 |
| <u>214390 s at</u> | BCAT1       | 0.5232                   | 0.000345 |
| <u>201015 s at</u> | JUP         | 0.5267                   | 0.000401 |
| <u>228557 at</u>   | L3MBTL4     | 0.5279                   | 0.000277 |



| Probe set          | gene symbol  | Fold-change:<br>Low/High | P-value  |
|--------------------|--------------|--------------------------|----------|
| <u>227210 at</u>   |              | 0.5286                   | 0.000139 |
| <u>209960 at</u>   | HGF          | 0.5329                   | 0.000751 |
| <u>212203 x at</u> | IFITM3       | 0.5343                   | 7.90E-06 |
| <u>229344 x at</u> | RIMKLB       | 0.5346                   | 3.93E-05 |
| <u>205659 at</u>   | HDAC9        | 0.5362                   | 0.000629 |
| <u>230405 at</u>   | C5orf56      | 0.5363                   | 2.42E-05 |
| <u>225651 at</u>   | UBE2E2       | 0.5375                   | 0.000807 |
| <u>213447 at</u>   |              | 0.5474                   | 0.000131 |
| <u>226164 x at</u> | RIMKLB       | 0.5476                   | 0.000225 |
| <u>206429 at</u>   | F2RL1        | 0.5504                   | 2.58E-05 |
| <u>225978 at</u>   | RIMKLB       | 0.5519                   | 1.75E-05 |
| <u>217080 s at</u> | HOMER2       | 0.5542                   | 0.000154 |
| <u>225999 at</u>   | RIMKLB       | 0.5550                   | 2.05E-05 |
| <u>217078 s at</u> | CD300A       | 0.5557                   | 0.000471 |
| <u>232286 at</u>   |              | 0.5570                   | 9.89E-05 |
| <u>212667 at</u>   | SPARC        | 0.5574                   | 0.000317 |
| <u>204269 at</u>   | PIM2         | 0.5593                   | 0.000432 |
| <u>207030 s at</u> | CSRP2        | 0.5647                   | 0.000193 |
| <u>235574 at</u>   | GBP4         | 0.5675                   | 0.000729 |
| <u>218825 at</u>   | EGFL7        | 0.5707                   | 0.000853 |
| <u>207735 at</u>   | RNF125       | 0.5716                   | 0.000141 |
| <u>216060 s at</u> | DAAM1        | 0.5727                   | 0.000272 |
| <u>226550 at</u>   |              | 0.5727                   | 0.000602 |
| <u>209321 s at</u> | ADCY3        | 0.5758                   | 0.000488 |
| <u>207124 s at</u> | GNB5         | 0.5761                   | 2.83E-05 |
| <u>212875 s at</u> | C2CD2        | 0.5788                   | 7.03E-05 |
| <u>228899 at</u>   | LOC100132884 | 0.5811                   | 0.000929 |
| <u>226666 at</u>   | DAAM1        | 0.5825                   | 0.000561 |
| <u>209679 s at</u> | SMAGP        | 0.5827                   | 0.0004   |
| <u>220936 s at</u> | H2AFJ        | 0.5919                   | 0.000445 |
| <u>212675 s at</u> | CEP68        | 0.5921                   | 0.000144 |
| <u>212235 at</u>   | PLXND1       | 0.5970                   | 0.000316 |
| <u>228167 at</u>   | KLHL6        | 0.5989                   | 0.000875 |
| <u>235061 at</u>   | PPM1K        | 0.6012                   | 0.000226 |
| <u>222731 at</u>   | ZDHHC2       | 0.6015                   | 8.31E-05 |
| <u>206313 at</u>   | HLA-DOA      | 0.6026                   | 7.36E-05 |
| <u>38671 at</u>    | PLXND1       | 0.6059                   | 0.000251 |
| <u>204897 at</u>   | PTGER4       | 0.6069                   | 0.00078  |
| <u>233138 at</u>   | C18orf1      | 0.6076                   | 0.000149 |
| <u>224046 s at</u> | PDE7A        | 0.6094                   | 0.000833 |
| <u>219282 s at</u> | TRPV2        | 0.6117                   | 0.000917 |
| <u>221221 s at</u> | KLHL3        | 0.6155                   | 0.000129 |
| <u>222857 s at</u> | KCNMB4       | 0.6165                   | 0.000146 |
| <u>233379 at</u>   | PRR5L        | 0.6175                   | 0.000268 |
| <u>204675 at</u>   | SRD5A1       | 0.6192                   | 0.000284 |
| <u>226773 at</u>   |              | 0.6192                   | 0.000667 |
| <u>212677 s at</u> | CEP68        | 0.6199                   | 0.000321 |
| <u>228049 x at</u> |              | 0.6235                   | 0.000202 |

| Probe set           | gene symbol | Fold-change:<br>Low/High | P-value  |
|---------------------|-------------|--------------------------|----------|
| <u>1560156 at</u>   |             | 0.6245                   | 0.000194 |
| <u>228213 at</u>    | H2AFJ       | 0.6250                   | 0.000667 |
| <u>203593 at</u>    | CD2AP       | 0.6287                   | 0.000606 |
| <u>224580 at</u>    | SLC38A1     | 0.6302                   | 0.000256 |
| <u>216286 at</u>    |             | 0.6325                   | 8.46E-05 |
| <u>235175 at</u>    | GBP4        | 0.6337                   | 0.000646 |
| <u>219363 s at</u>  | MTERFD1     | 0.6341                   | 0.000121 |
| <u>222453 at</u>    | CYBRD1      | 0.6352                   | 0.000793 |
| <u>242551 at</u>    |             | 0.6361                   | 0.000763 |
| <u>209163 at</u>    | CYB561      | 0.6389                   | 0.000502 |
| <u>1555486 a at</u> | PRR5L       | 0.6391                   | 4.17E-05 |
| <u>239317 at</u>    | CEACAM21    | 0.6401                   | 2.00E-07 |
| <u>244721 at</u>    | TP53INP1    | 0.6419                   | 0.000203 |
| <u>206896 s at</u>  | GNG7        | 0.6440                   | 2.70E-05 |
| <u>205961 s at</u>  | PSIP1       | 0.6474                   | 1.61E-05 |
| <u>219383 at</u>    | PRR5L       | 0.6480                   | 0.000148 |
| <u>238376 at</u>    |             | 0.6483                   | 0.000203 |
| <u>218928 s at</u>  | SLC37A1     | 0.6516                   | 9.48E-05 |
| <u>201315 x at</u>  | IFITM2      | 0.6572                   | 0.000695 |
| <u>240454 at</u>    |             | 0.6588                   | 5.50E-05 |
| <u>243452 at</u>    | LOC646778   | 0.6602                   | 0.000828 |
| <u>211056 s at</u>  | SRD5A1      | 0.6635                   | 0.000149 |
| <u>244561 at</u>    |             | 0.6653                   | 0.000985 |
| <u>227425 at</u>    | REPS2       | 0.6676                   | 0.000425 |
| <u>209961 s at</u>  | HGF         | 0.6681                   | 0.000124 |
| <u>234089 at</u>    |             | 0.6709                   | 1.95E-05 |
| <u>204000 at</u>    | GNB5        | 0.6734                   | 0.000414 |
| <u>220606 s at</u>  | C17orf48    | 0.6737                   | 0.000926 |
| <u>222855 s at</u>  | TRPV2       | 0.6773                   | 0.00044  |
| <u>242870 at</u>    | RIMKLB      | 0.6795                   | 0.000697 |
| <u>226335 at</u>    | RPS6KA3     | 0.6800                   | 5.90E-05 |
| <u>210757 x at</u>  | DAB2        | 0.6806                   | 0.000256 |
| <u>228362 s at</u>  | FAM26F      | 0.6844                   | 2.22E-05 |
| <u>336 at</u>       | TBXA2R      | 0.6932                   | 0.000478 |
| <u>222730 s at</u>  | ZDHHC2      | 0.6956                   | 0.000804 |
| <u>216565 x at</u>  |             | 0.6960                   | 0.000722 |
| <u>209337 at</u>    | PSIP1       | 0.6963                   | 0.000173 |
| <u>201279 s at</u>  | DAB2        | 0.6974                   | 0.000917 |
| <u>1554360 at</u>   | FCHSD2      | 0.6986                   | 0.000272 |
| <u>213628 at</u>    | CLCC1       | 0.7014                   | 0.000637 |
| <u>212829 at</u>    | PIP4K2A     | 0.7048                   | 0.000983 |
| <u>204109 s at</u>  | NFYA        | 0.7050                   | 0.000138 |
| <u>211871 x at</u>  | GNB5        | 0.7089                   | 0.000682 |
| <u>203843 at</u>    | RPS6KA3     | 0.7095                   | 0.000162 |
| <u>218451 at</u>    | CDCP1       | 0.7156                   | 0.000855 |
| <u>232948 at</u>    |             | 0.7176                   | 0.000518 |
| <u>205645 at</u>    | REPS2       | 0.7210                   | 0.000704 |
| <u>1566880 at</u>   |             | 0.7240                   | 0.000756 |

| Probe set           | gene symbol | Fold-change:<br>Low/High | P-value  |
|---------------------|-------------|--------------------------|----------|
| <u>41220 at</u>     | SEPT9       | 0.7315                   | 0.000279 |
| <u>225879 at</u>    | TSEN54      | 0.7323                   | 0.000842 |
| <u>229631 at</u>    | DNHD1       | 0.7357                   | 0.00079  |
| <u>1556097 at</u>   |             | 0.7406                   | 0.000733 |
| <u>243951 at</u>    | ABCB1       | 0.7408                   | 0.000981 |
| <u>215659 at</u>    | GSDMB       | 0.7589                   | 0.000165 |
| <u>223334 at</u>    | TMEM126A    | 0.7708                   | 7.00E-04 |
| <u>201222 s at</u>  | RAD23B      | 0.7736                   | 0.000309 |
| <u>212271 at</u>    | MAPK1       | 0.7881                   | 0.000489 |
| <u>219313 at</u>    | GRAMD1C     | 0.8225                   | 0.000458 |
| <u>221849 s at</u>  | DCAF15      | 1.2408                   | 0.000339 |
| <u>204177 s at</u>  | KLHL20      | 1.2424                   | 0.000943 |
| <u>239610 at</u>    |             | 1.2448                   | 0.000809 |
| <u>217784 at</u>    | YKT6        | 1.2472                   | 0.000406 |
| <u>221953 s at</u>  | EDEM2       | 1.2539                   | 0.000909 |
| <u>241930 x at</u>  | LOC442113   | 1.2542                   | 0.000735 |
| <u>221799 at</u>    | CHPF2       | 1.2636                   | 0.000696 |
| <u>223527 s at</u>  | CDADC1      | 1.2665                   | 0.000399 |
| <u>233101 at</u>    | MTMR9       | 1.2698                   | 0.000453 |
| <u>211168 s at</u>  | UPF1        | 1.2740                   | 0.000304 |
| <u>44822 s at</u>   | MIER2       | 1.2754                   | 0.000763 |
| <u>221738 at</u>    | KIAA1219    | 1.2757                   | 0.000482 |
| <u>201155 s at</u>  | MFN2        | 1.2774                   | 0.000215 |
| <u>233564 s at</u>  | CDADC1      | 1.2785                   | 0.000849 |
| <u>242337 at</u>    |             | 1.2825                   | 0.000612 |
| <u>232228 at</u>    | ZNF530      | 1.2828                   | 0.000231 |
| <u>217888 s at</u>  | ARFGAP1     | 1.2840                   | 7.33E-05 |
| <u>231225 at</u>    |             | 1.2859                   | 0.000476 |
| <u>228138 at</u>    | ZNF498      | 1.2884                   | 0.000613 |
| <u>242808 at</u>    |             | 1.2896                   | 0.000858 |
| <u>1554509 a at</u> | FAM188A     | 1.2897                   | 0.000698 |
| <u>221927 s at</u>  | ABHD11      | 1.2909                   | 0.000123 |
| <u>210428 s at</u>  | HGS         | 1.2920                   | 0.000782 |
| <u>237064 x at</u>  |             | 1.2980                   | 0.000504 |
| <u>213497 at</u>    | ABTB2       | 1.2996                   | 0.00043  |
| <u>218749 s at</u>  | SLC24A6     | 1.3000                   | 0.00063  |
| <u>1570264 at</u>   |             | 1.3003                   | 0.000633 |
| <u>244664 at</u>    |             | 1.3007                   | 0.000242 |
| <u>220746 s at</u>  | UIMC1       | 1.3025                   | 0.000263 |
| <u>244218 at</u>    |             | 1.3051                   | 0.000111 |
| <u>218297 at</u>    | FAM188A     | 1.3059                   | 0.000672 |
| <u>222767 s at</u>  | C12orf49    | 1.3063                   | 0.000262 |
| <u>203938 s at</u>  | TAF1C       | 1.3077                   | 6.91E-05 |
| <u>232135 at</u>    | SAP30L      | 1.3085                   | 0.000719 |
| <u>234788 x at</u>  |             | 1.3102                   | 0.000885 |
| <u>228139 at</u>    | RIPK3       | 1.3111                   | 0.00058  |
| <u>211256 x at</u>  | BTN2A1      | 1.3117                   | 0.00028  |
| <u>1559759 at</u>   | KIFC3       | 1.3134                   | 9.10E-05 |

| Probe set           | gene symbol | Fold-change:<br>Low/High | P-value  |
|---------------------|-------------|--------------------------|----------|
| <u>228271 at</u>    |             | 1.3170                   | 0.00047  |
| <u>209222 s at</u>  | OSBPL2      | 1.3208                   | 0.00046  |
| <u>200977 s at</u>  | TAX1BP1     | 1.3209                   | 0.000537 |
| <u>218272 at</u>    | TTC38       | 1.3217                   | 0.000425 |
| <u>215641 at</u>    | SEC24D      | 1.3217                   | 0.000969 |
| <u>202851 at</u>    | AAGAB       | 1.3228                   | 0.000241 |
| <u>226706 at</u>    |             | 1.3234                   | 0.000197 |
| <u>240175 at</u>    |             | 1.3252                   | 8.14E-05 |
| <u>213066 at</u>    | RUSC2       | 1.3267                   | 0.000432 |
| <u>202361 at</u>    | SEC24C      | 1.3297                   | 0.000104 |
| <u>225848 at</u>    | ZNF746      | 1.3313                   | 0.000741 |
| <u>1564773 x at</u> |             | 1.3318                   | 8.84E-05 |
| <u>228683 s at</u>  | KCTD15      | 1.3347                   | 0.000124 |
| <u>226759 at</u>    | IKZF4       | 1.3356                   | 0.000153 |
| <u>203943 at</u>    | KIF3B       | 1.3371                   | 0.000903 |
| <u>204555 s at</u>  | PPP1R3D     | 1.3430                   | 0.000348 |
| <u>225205 at</u>    | KIF3B       | 1.3452                   | 0.000219 |
| <u>213196 at</u>    | ZNF629      | 1.3454                   | 7.65E-05 |
| <u>220140 s at</u>  | SNX11       | 1.3457                   | 3.50E-05 |
| <u>212297 at</u>    | ATP13A3     | 1.3474                   | 0.000328 |
| <u>218821 at</u>    | NPEPL1      | 1.3485                   | 0.000976 |
| <u>1555117 at</u>   |             | 1.3492                   | 0.00021  |
| <u>240151 at</u>    |             | 1.3510                   | 0.00079  |
| <u>204877 s at</u>  | TAOK2       | 1.3543                   | 2.97E-05 |
| <u>209211 at</u>    | KLF5        | 1.3545                   | 2.13E-05 |
| <u>226229 s at</u>  | SSU72       | 1.3559                   | 6.60E-06 |
| <u>227547 at</u>    |             | 1.3561                   | 8.67E-05 |
| <u>238134 at</u>    |             | 1.3572                   | 0.000252 |
| <u>232148 at</u>    | NSMAF       | 1.3628                   | 0.00023  |
| <u>226761 at</u>    | IKZF4       | 1.3628                   | 0.000101 |
| <u>233936 s at</u>  | GGNBP2      | 1.3717                   | 0.000965 |
| <u>238295 at</u>    | C17orf42    | 1.3734                   | 0.000848 |
| <u>237119 at</u>    |             | 1.3748                   | 0.000638 |
| <u>1556762 a at</u> |             | 1.3754                   | 0.000402 |
| <u>207023 x at</u>  | KRT10       | 1.3763                   | 0.000202 |
| <u>236346 at</u>    |             | 1.3776                   | 0.00036  |
| <u>214965 at</u>    | SPATA2L     | 1.3787                   | 7.80E-06 |
| <u>229743 at</u>    | ZNF438      | 1.3802                   | 0.000824 |
| <u>229059 at</u>    |             | 1.3819                   | 0.000279 |
| <u>222199 s at</u>  | BIN3        | 1.3850                   | 0.000106 |
| <u>242749 at</u>    |             | 1.3853                   | 7.39E-05 |
| <u>230528 s at</u>  | MGC2752     | 1.3875                   | 0.000519 |
| <u>232659 at</u>    |             | 1.3884                   | 0.000656 |
| <u>203590 at</u>    | DYNC1LI2    | 1.3886                   | 6.83E-05 |
| <u>232906 at</u>    |             | 1.3888                   | 8.15E-05 |
| <u>1565894 at</u>   |             | 1.3917                   | 8.00E-06 |
| <u>205107 s at</u>  | EFNA4       | 1.3934                   | 0.000638 |
| <u>202197 at</u>    | MTMR3       | 1.3941                   | 0.000113 |

| Probe set           | gene symbol | Fold-change:<br>Low/High | P-value  |
|---------------------|-------------|--------------------------|----------|
| <u>215493_x_at</u>  | BTN2A1      | 1.3951                   | 0.000121 |
| <u>203944_x_at</u>  | BTN2A1      | 1.3971                   | 3.12E-05 |
| <u>242922_at</u>    |             | 1.4012                   | 3.76E-05 |
| <u>229776_at</u>    | SLCO3A1     | 1.4015                   | 0.000425 |
| <u>1554860_at</u>   | PTPN7       | 1.4016                   | 0.000108 |
| <u>241775_at</u>    |             | 1.4061                   | 0.00066  |
| <u>213287_s_at</u>  | KRT10       | 1.4079                   | 0.000153 |
| <u>218941_at</u>    | FBXW2       | 1.4093                   | 0.000774 |
| <u>227575_s_at</u>  | C14orf102   | 1.4096                   | 0.000408 |
| <u>222894_x_at</u>  | C20orf7     | 1.4104                   | 0.000487 |
| <u>210469_at</u>    | DLG5        | 1.4114                   | 0.000975 |
| <u>1555303_at</u>   |             | 1.4140                   | 4.39E-05 |
| <u>205745_x_at</u>  | ADAM17      | 1.4147                   | 0.000105 |
| <u>225381_at</u>    | LOC399959   | 1.4183                   | 0.000696 |
| <u>239392_s_at</u>  | POGK        | 1.4191                   | 0.000222 |
| <u>226566_at</u>    | TRIM11      | 1.4208                   | 4.32E-05 |
| <u>239311_at</u>    |             | 1.4239                   | 3.80E-06 |
| <u>224616_at</u>    | DYNC1LI2    | 1.4281                   | 0.000339 |
| <u>243280_at</u>    |             | 1.4310                   | 0.000942 |
| <u>226271_at</u>    | GDAP1       | 1.4313                   | 6.55E-05 |
| <u>235595_at</u>    | ARHGEF2     | 1.4313                   | 0.000398 |
| <u>1556416_s_at</u> |             | 1.4374                   | 2.92E-05 |
| <u>1555872_a_at</u> |             | 1.4385                   | 0.000886 |
| <u>46665_at</u>     | SEMA4C      | 1.4400                   | 0.000952 |
| <u>233596_at</u>    |             | 1.4559                   | 0.000373 |
| <u>209438_at</u>    | PHKA2       | 1.4575                   | 8.34E-05 |
| <u>227160_s_at</u>  | C20orf7     | 1.4598                   | 0.000213 |
| <u>224614_at</u>    | DYNC1LI2    | 1.4607                   | 2.88E-05 |
| <u>216548_x_at</u>  | HMGB3L1     | 1.4611                   | 9.08E-05 |
| <u>219951_s_at</u>  | C20orf12    | 1.4618                   | 0.000915 |
| <u>219028_at</u>    | HIPK2       | 1.4623                   | 1.93E-05 |
| <u>241242_at</u>    |             | 1.4633                   | 0.000705 |
| <u>233122_at</u>    | KRTCAP2     | 1.4727                   | 0.000209 |
| <u>205746_s_at</u>  | ADAM17      | 1.4730                   | 0.000397 |
| <u>226298_at</u>    | RUNDC1      | 1.4749                   | 0.000872 |
| <u>237096_at</u>    |             | 1.4809                   | 0.000259 |
| <u>227219_x_at</u>  | MAP1LC3A    | 1.4810                   | 5.77E-05 |
| <u>205934_at</u>    | PLCL1       | 1.4815                   | 0.000616 |
| <u>227949_at</u>    | PHACTR3     | 1.4889                   | 0.00028  |
| <u>202807_s_at</u>  | TOM1        | 1.4926                   | 0.000361 |
| <u>230974_at</u>    | DDX19B      | 1.4928                   | 2.23E-05 |
| <u>222692_s_at</u>  | FNDC3B      | 1.4934                   | 0.00094  |
| <u>213532_at</u>    | ADAM17      | 1.5047                   | 2.58E-05 |
| <u>204998_s_at</u>  | ATF5        | 1.5078                   | 2.51E-05 |
| <u>225097_at</u>    | HIPK2       | 1.5082                   | 0.000406 |
| <u>228349_at</u>    |             | 1.5100                   | 1.85E-05 |
| <u>209439_s_at</u>  | PHKA2       | 1.5123                   | 9.10E-06 |
| <u>228723_at</u>    |             | 1.5138                   | 0.000737 |

| Probe set          | gene symbol | Fold-change:<br>Low/High | P-value  |
|--------------------|-------------|--------------------------|----------|
| <u>225116 at</u>   | HIPK2       | 1.5149                   | 0.000771 |
| <u>223908 at</u>   | HDAC8       | 1.5154                   | 0.000952 |
| <u>233229 at</u>   | SCFD1       | 1.5165                   | 0.000339 |
| <u>223464 at</u>   | OSBPL5      | 1.5231                   | 0.000278 |
| <u>1557810 at</u>  |             | 1.5282                   | 0.000501 |
| <u>228983 at</u>   |             | 1.5316                   | 0.000183 |
| <u>208499 s at</u> | DNAJC3      | 1.5365                   | 0.000192 |
| <u>1556053 at</u>  | DNAJC7      | 1.5494                   | 0.000368 |
| <u>244027 at</u>   |             | 1.5518                   | 0.000892 |
| <u>234978 at</u>   | SLC36A4     | 1.5562                   | 0.000512 |
| <u>220795 s at</u> | BEGAIN      | 1.5570                   | 0.00063  |
| <u>204999 s at</u> | ATF5        | 1.5591                   | 3.24E-05 |
| <u>238000 at</u>   |             | 1.5621                   | 0.000809 |
| <u>242068 at</u>   |             | 1.5641                   | 0.000179 |
| <u>239022 at</u>   |             | 1.5654                   | 0.000174 |
| <u>214457 at</u>   | HOXA2       | 1.5693                   | 2.57E-05 |
| <u>227334 at</u>   | USP54       | 1.5752                   | 0.000886 |
| <u>232405 at</u>   |             | 1.5761                   | 0.000363 |
| <u>223393 s at</u> | TSHZ3       | 1.5804                   | 0.000396 |
| <u>206862 at</u>   | ZNF254      | 1.5819                   | 0.000276 |
| <u>224378 x at</u> | MAP1LC3A    | 1.5823                   | 0.000154 |
| <u>233393 at</u>   |             | 1.5842                   | 0.000349 |
| <u>209333 at</u>   | ULK1        | 1.5892                   | 1.02E-05 |
| <u>225522 at</u>   | AAK1        | 1.5899                   | 0.000134 |
| <u>217620 s at</u> | PIK3CB      | 1.5973                   | 0.000768 |
| <u>235009 at</u>   | BOD1L       | 1.5976                   | 6.90E-05 |
| <u>206289 at</u>   | HOXA4       | 1.6082                   | 0.000444 |
| <u>232011 s at</u> | MAP1LC3A    | 1.6116                   | 0.000238 |
| <u>242343 x at</u> |             | 1.6127                   | 0.000424 |
| <u>239892 at</u>   |             | 1.6138                   | 3.79E-05 |
| <u>235662 at</u>   |             | 1.6170                   | 0.000316 |
| <u>226905 at</u>   | FAM101B     | 1.6184                   | 1.20E-06 |
| <u>237798 at</u>   |             | 1.6218                   | 0.000101 |
| <u>205601 s at</u> | HOXB5       | 1.6229                   | 0.000537 |
| <u>201482 at</u>   | QSOX1       | 1.6232                   | 0.000433 |
| <u>215024 at</u>   | C7orf28B    | 1.6255                   | 0.000328 |
| <u>229907 at</u>   |             | 1.6260                   | 1.20E-06 |
| <u>216417 x at</u> | HOXB9       | 1.6276                   | 0.000368 |
| <u>210458 s at</u> | TANK        | 1.6379                   | 0.000168 |
| <u>229897 at</u>   | ZNF641      | 1.6393                   | 2.00E-07 |
| <u>219229 at</u>   | SLCO3A1     | 1.6407                   | 0.000795 |
| <u>232113 at</u>   |             | 1.6471                   | 0.000857 |
| <u>236429 at</u>   | ZNF83       | 1.6572                   | 3.03E-05 |
| <u>204363 at</u>   | F3          | 1.6626                   | 5.44E-05 |
| <u>242827 x at</u> |             | 1.6670                   | 0.000403 |
| <u>214033 at</u>   | ABCC6       | 1.6688                   | 0.000797 |
| <u>235749 at</u>   | UGGT2       | 1.6809                   | 0.000466 |
| <u>205434 s at</u> | AAK1        | 1.6908                   | 6.79E-05 |

| Probe set           | gene symbol    | Fold-change:<br>Low/High | P-value  |
|---------------------|----------------|--------------------------|----------|
| <u>234186 at</u>    |                | 1.6938                   | 0.0004   |
| <u>1556761 at</u>   |                | 1.6942                   | 0.000155 |
| <u>239457 at</u>    | ATP8B3         | 1.7075                   | 0.000394 |
| <u>230648 at</u>    | LOC283663      | 1.7177                   | 0.000166 |
| <u>206589 at</u>    | GFI1           | 1.7407                   | 0.000185 |
| <u>215209 at</u>    | SEC24D         | 1.7438                   | 0.000229 |
| <u>226876 at</u>    | FAM101B        | 1.7631                   | 7.00E-07 |
| <u>221766 s at</u>  | FAM46A         | 1.7675                   | 0.000386 |
| <u>214639 s at</u>  | HOXA1          | 1.7715                   | 0.000813 |
| <u>231858 x at</u>  | DKFZp761E198   | 1.7802                   | 5.59E-05 |
| <u>236899 at</u>    |                | 1.7901                   | 8.94E-05 |
| <u>229865 at</u>    | FNDC3B         | 1.7913                   | 0.000904 |
| <u>232068 s at</u>  | TLR4           | 1.8080                   | 0.00061  |
| <u>238919 at</u>    |                | 1.8091                   | 0.000451 |
| <u>215623 x at</u>  | SMC4           | 1.8203                   | 8.90E-06 |
| <u>202766 s at</u>  | FBN1           | 1.8216                   | 0.0008   |
| <u>204778 x at</u>  | HOXB7          | 1.8327                   | 6.70E-06 |
| <u>1559049 a at</u> |                | 1.8866                   | 0.000992 |
| <u>232903 at</u>    |                | 1.9030                   | 6.20E-06 |
| <u>206847 s at</u>  | HOXA7          | 1.9103                   | 0.000185 |
| <u>235112 at</u>    |                | 1.9432                   | 0.00058  |
| <u>222363 at</u>    |                | 1.9696                   | 7.06E-05 |
| <u>235249 at</u>    | RDH13          | 1.9865                   | 3.05E-05 |
| <u>232406 at</u>    |                | 2.0013                   | 0.000204 |
| <u>218865 at</u>    | MOSC1          | 2.0082                   | 0.000201 |
| <u>204750 s at</u>  | DSC2           | 2.0114                   | 0.000726 |
| <u>230743 at</u>    | LOC404266      | 2.0186                   | 0.000785 |
| <u>229715 at</u>    | DKFZp686O24166 | 2.0241                   | 0.000349 |
| <u>213147 at</u>    | HOXA10         | 2.0295                   | 0.000398 |
| <u>231183 s at</u>  | JAG1           | 2.0319                   | 8.49E-05 |
| <u>1556589 at</u>   |                | 2.0408                   | 0.00036  |
| <u>205600 x at</u>  | HOXB5          | 2.0784                   | 0.0005   |
| <u>241497 at</u>    |                | 2.0818                   | 3.43E-05 |
| <u>228790 at</u>    | FAM110B        | 2.0855                   | 0.000399 |
| <u>210377 at</u>    | ACSM3          | 2.1104                   | 0.000916 |
| <u>202728 s at</u>  | LTBP1          | 2.1167                   | 0.000577 |
| <u>209706 at</u>    | NKX3-1         | 2.1227                   | 1.51E-05 |
| <u>221075 s at</u>  | NCR2           | 2.1338                   | 0.000834 |
| <u>208557 at</u>    | HOXA6          | 2.1449                   | 0.000118 |
| <u>209098 s at</u>  | JAG1           | 2.1677                   | 2.49E-05 |
| <u>240772 at</u>    |                | 2.1802                   | 4.16E-05 |
| <u>204984 at</u>    | GPC4           | 2.1971                   | 8.03E-05 |
| <u>220898 at</u>    |                | 2.2378                   | 0.000402 |
| <u>232979 at</u>    |                | 2.2473                   | 4.41E-05 |
| <u>204779 s at</u>  | HOXB7          | 2.2677                   | 0.000853 |
| <u>1559117 at</u>   |                | 2.2779                   | 0.000537 |
| <u>235753 at</u>    | HOXA7          | 2.2938                   | 0.000392 |
| <u>226123 at</u>    | CHD7           | 2.2972                   | 0.000257 |

| Probe set           | gene symbol | Fold-change:<br>Low/High | P-value  |
|---------------------|-------------|--------------------------|----------|
| <u>209099_x_at</u>  | JAG1        | 2.2993                   | 0.000521 |
| <u>218829_s_at</u>  | CHD7        | 2.3267                   | 0.000787 |
| <u>215489_x_at</u>  |             | 2.3448                   | 0.000501 |
| <u>220798_x_at</u>  | PRG2        | 2.3496                   | 5.40E-06 |
| <u>222222_s_at</u>  | HOMER3      | 2.3595                   | 4.24E-05 |
| <u>216268_s_at</u>  | JAG1        | 2.4071                   | 0.00037  |
| <u>224836_at</u>    | TP53INP2    | 2.4320                   | 3.00E-07 |
| <u>204983_s_at</u>  | GPC4        | 2.4745                   | 0.000127 |
| <u>230245_s_at</u>  | LOC283663   | 2.4768                   | 4.86E-05 |
| <u>217521_at</u>    |             | 2.4901                   | 1.40E-06 |
| <u>219304_s_at</u>  | PDGFD       | 2.4930                   | 0.000425 |
| <u>226461_at</u>    | HOXB9       | 2.4965                   | 0.00025  |
| <u>236193_at</u>    | HIST1H2BC   | 2.5064                   | 0.000231 |
| <u>206157_at</u>    | PTX3        | 2.5231                   | 0.000903 |
| <u>1554453_at</u>   | HNRPLL      | 2.5448                   | 3.75E-05 |
| <u>214455_at</u>    | HIST1H2BC   | 2.5620                   | 0.000173 |
| <u>241692_at</u>    |             | 2.5702                   | 4.50E-05 |
| <u>225386_s_at</u>  | HNRPLL      | 2.5943                   | 5.06E-05 |
| <u>239791_at</u>    |             | 2.5988                   | 0.000254 |
| <u>204751_x_at</u>  | DSC2        | 2.6018                   | 0.000594 |
| <u>204647_at</u>    | HOMER3      | 2.6479                   | 0.000113 |
| <u>205942_s_at</u>  | ACSM3       | 2.6539                   | 0.000124 |
| <u>220110_s_at</u>  | NXF3        | 2.6857                   | 0.000326 |
| <u>228497_at</u>    | SLC22A15    | 2.7598                   | 0.000951 |
| <u>206111_at</u>    | RNASE2      | 2.7625                   | 0.000747 |
| <u>205366_s_at</u>  | HOXB6       | 2.7632                   | 8.79E-05 |
| <u>1556590_s_at</u> |             | 2.7866                   | 0.000209 |
| <u>209905_at</u>    | HOXA9       | 2.8551                   | 0.000771 |
| <u>215761_at</u>    | DMXL2       | 2.8563                   | 3.61E-05 |
| <u>221959_at</u>    | FAM110B     | 2.8684                   | 1.08E-05 |
| <u>205382_s_at</u>  | CFD         | 2.9108                   | 0.000315 |
| <u>242172_at</u>    | MEIS1       | 3.1216                   | 5.05E-05 |
| <u>232668_at</u>    |             | 3.2436                   | 0.000291 |
| <u>204069_at</u>    | MEIS1       | 3.2507                   | 0.000149 |
| <u>212820_at</u>    | DMXL2       | 3.2875                   | 1.70E-06 |
| <u>1558871_at</u>   |             | 3.5201                   | 0.000103 |
| <u>238022_at</u>    | CRNDE       | 3.5277                   | 2.19E-05 |
| <u>206851_at</u>    | RNASE3      | 3.5559                   | 1.09E-05 |
| <u>1559477_s_at</u> | MEIS1       | 3.6059                   | 8.52E-05 |
| <u>205801_s_at</u>  | RASGRP3     | 3.6196                   | 1.80E-06 |
| <u>206643_at</u>    | HAL         | 3.6471                   | 7.90E-06 |
| <u>238021_s_at</u>  | CRNDE       | 3.7246                   | 2.87E-05 |
| <u>228904_at</u>    | HOXB3       | 3.8040                   | 0.000432 |
| <u>213844_at</u>    | HOXA5       | 3.8611                   | 0.000304 |
| <u>229638_at</u>    | IRX3        | 3.8844                   | 9.50E-06 |
| <u>235521_at</u>    | HOXA3       | 3.9067                   | 4.97E-05 |
| <u>214575_s_at</u>  | AZU1        | 3.9930                   | 0.0001   |
| <u>218332_at</u>    | BEX1        | 4.2576                   | 0.000157 |



| <b>Probe set</b>    | <b>gene symbol</b> | <b>Fold-<br/>change:<br/>Low/High</b> | <b>P-value</b> |
|---------------------|--------------------|---------------------------------------|----------------|
| <u>210239</u> at    | IRX5               | 4.2583                                | 1.10E-06       |
| <u>236892</u> s at  |                    | 4.4202                                | 4.75E-05       |
| <u>219737</u> s at  | PCDH9              | 4.5253                                | 1.20E-06       |
| <u>1553613</u> s at | FOXC1              | 4.9747                                | 0.000653       |
| <u>205653</u> at    | CTSG               | 6.0141                                | 4.20E-06       |

**Table S3. 1554 probe sets associated with low *ERG* expression in older CN-AML patients**

| Probe set           | Gene Symbol | Fold-change: |          |
|---------------------|-------------|--------------|----------|
|                     |             | Low/High     | P-value  |
| <u>1552908_at</u>   | C1orf150    | 0.2989       | 2.28E-05 |
| <u>203372_s_at</u>  | SOCS2       | 0.3480       | 0.000415 |
| <u>221942_s_at</u>  | GUCY1A3     | 0.3546       | 1.01E-05 |
| <u>227235_at</u>    | GUCY1A3     | 0.3631       | 7.20E-06 |
| <u>218858_at</u>    | DEPDC6      | 0.3788       | 1.80E-06 |
| <u>229530_at</u>    | GUCY1A3     | 0.3831       | 1.35E-05 |
| <u>227297_at</u>    | ITGA9       | 0.3842       | 0.000172 |
| <u>213541_s_at</u>  | ERG         | 0.3965       | 2.25E-05 |
| <u>225841_at</u>    | C1orf59     | 0.4136       | 4.25E-05 |
| <u>209537_at</u>    | EXTL2       | 0.4209       | 2.00E-07 |
| <u>223253_at</u>    | EPDR1       | 0.4330       | 5.47E-05 |
| <u>222603_at</u>    | ERMP1       | 0.4343       | 0.000128 |
| <u>202742_s_at</u>  | PRKACB      | 0.4374       | 2.00E-07 |
| <u>1554876_a_at</u> | S100Z       | 0.4419       | 0.000186 |
| <u>235333_at</u>    | B4GALT6     | 0.4445       | 0.000235 |
| <u>203139_at</u>    | DAPK1       | 0.4501       | 0.000086 |
| <u>224285_at</u>    | GPR174      | 0.4546       | 0.000116 |
| <u>206233_at</u>    | B4GALT6     | 0.4576       | 1.84E-05 |
| <u>204521_at</u>    | C12orf24    | 0.4584       | 0.000022 |
| <u>222824_at</u>    |             | 0.4626       | 1.66E-05 |
| <u>239963_at</u>    |             | 0.4637       | 8.22E-05 |
| <u>227236_at</u>    | TSPAN2      | 0.4654       | 0.000756 |
| <u>224996_at</u>    | ASPH        | 0.4704       | 0.000696 |
| <u>220637_at</u>    | FAM124B     | 0.4715       | 1.30E-05 |
| <u>206232_s_at</u>  | B4GALT6     | 0.4743       | 4.80E-06 |
| <u>226126_at</u>    | TBCKL       | 0.4755       | 1.75E-05 |
| <u>1558956_s_at</u> | IFT80       | 0.4771       | 0.000677 |
| <u>218491_s_at</u>  | THYN1       | 0.4775       | 1.35E-05 |
| <u>236918_s_at</u>  | LRRC34      | 0.4794       | 0.000159 |
| <u>239108_at</u>    | FAR2        | 0.4835       | 0.000148 |
| <u>225551_at</u>    | C1orf71     | 0.4841       | 1.40E-06 |
| <u>226794_at</u>    | STXBP5      | 0.4853       | 1.08E-05 |
| <u>223155_at</u>    | HDHD2       | 0.4856       | 0.000669 |
| <u>226478_at</u>    | TM7SF3      | 0.4861       | 8.53E-05 |
| <u>204839_at</u>    | POP5        | 0.4869       | 0.000125 |
| <u>219654_at</u>    | PTPLA       | 0.4870       | 0.000004 |
| <u>202890_at</u>    | MAP7        | 0.4875       | 0.000968 |
| <u>236917_at</u>    | LRRC34      | 0.4888       | 2.06E-05 |
| <u>218984_at</u>    | PUS7        | 0.4896       | 0.000106 |
| <u>215767_at</u>    | ZNF804A     | 0.4915       | 0.000402 |
| <u>202950_at</u>    | CRYZ        | 0.4941       | 1.06E-05 |
| <u>203284_s_at</u>  | HS2ST1      | 0.4946       | 6.10E-06 |
| <u>229391_s_at</u>  | FAM26F      | 0.4961       | 0.000432 |
| <u>213698_at</u>    | ZMYM6       | 0.4969       | 0.000249 |
| <u>201302_at</u>    | ANXA4       | 0.4981       | 0.000454 |
| <u>201307_at</u>    | SEPT11      | 0.5005       | 0.000017 |

| <b>Probe set</b>    | <b>Gene Symbol</b> | <b>Fold-change:<br/>Low/High</b> | <b>P-value</b> |
|---------------------|--------------------|----------------------------------|----------------|
| <u>239580 at</u>    | GUCY1A3            | 0.5017                           | 1.28E-05       |
| <u>219032 x at</u>  | OPN3               | 0.5051                           | 0.000618       |
| <u>226098 at</u>    | IFT80              | 0.5053                           | 0.000631       |
| <u>201301 s at</u>  | ANXA4              | 0.5080                           | 0.000519       |
| <u>206667 s at</u>  | SCAMP1             | 0.5081                           | 1E-07          |
| <u>231747 at</u>    | CYSLTR1            | 0.5084                           | 0.000178       |
| <u>213427 at</u>    | RPP40              | 0.5101                           | 7.57E-05       |
| <u>232383 at</u>    | TFEC               | 0.5101                           | 0.000571       |
| <u>225485 at</u>    | TSGA14             | 0.5117                           | 0.000133       |
| <u>220615 s at</u>  | FAR2               | 0.5123                           | 0.000054       |
| <u>225550 at</u>    | C1orf71            | 0.5138                           | 4.00E-06       |
| <u>213246 at</u>    | C14orf109          | 0.5142                           | 4.27E-05       |
| <u>225725 at</u>    |                    | 0.5150                           | 9.89E-05       |
| <u>229971 at</u>    | GPR114             | 0.5161                           | 2.41E-05       |
| <u>222477 s at</u>  | TM7SF3             | 0.5161                           | 0.000106       |
| <u>202741 at</u>    | PRKACB             | 0.5189                           | 4.90E-06       |
| <u>213395 at</u>    | MLC1               | 0.5197                           | 0.000266       |
| <u>1558105 a at</u> |                    | 0.5204                           | 0.0004         |
| <u>230866 at</u>    | CYSLTR1            | 0.5219                           | 0.00011        |
| <u>228697 at</u>    | HINT3              | 0.5226                           | 0.000783       |
| <u>218557 at</u>    | NIT2               | 0.5229                           | 2.23E-05       |
| <u>219553 at</u>    | NME7               | 0.5233                           | 9.00E-07       |
| <u>225439 at</u>    | NUDCD1             | 0.5237                           | 7.00E-07       |
| <u>224812 at</u>    | HIBADH             | 0.5253                           | 1.00E-05       |
| <u>222746 s at</u>  | BSPRY              | 0.5254                           | 3.00E-07       |
| <u>226073 at</u>    | TMEM218            | 0.5268                           | 0.000188       |
| <u>210653 s at</u>  | BCKDHB             | 0.5270                           | 0.000106       |
| <u>227522 at</u>    | CMBL               | 0.5272                           | 0.000372       |
| <u>218788 s at</u>  | SMYD3              | 0.5277                           | 0.000258       |
| <u>225274 at</u>    | PCYOX1             | 0.5285                           | 4.11E-05       |
| <u>227639 at</u>    | PIGK               | 0.5291                           | 0.000171       |
| <u>235227 at</u>    |                    | 0.5293                           | 1.22E-05       |
| <u>218342 s at</u>  | ERMP1              | 0.5298                           | 3.45E-05       |
| <u>219048 at</u>    | PIGN               | 0.5304                           | 0.00005        |
| <u>220591 s at</u>  | EFHC2              | 0.5313                           | 0.000691       |
| <u>213346 at</u>    | C13orf27           | 0.5321                           | 0.000471       |
| <u>1552386 at</u>   | GAPT               | 0.5325                           | 0.000591       |
| <u>220307 at</u>    | CD244              | 0.5332                           | 0.000131       |
| <u>226152 at</u>    | TTC7B              | 0.5336                           | 1.17E-05       |
| <u>222428 s at</u>  | LARS               | 0.5341                           | 0.00057        |
| <u>201308 s at</u>  | SEPT11             | 0.5345                           | 1.29E-05       |
| <u>235287 at</u>    | CDK6               | 0.5362                           | 0.000513       |
| <u>211031 s at</u>  | CLIP2              | 0.5363                           | 2.82E-05       |
| <u>212414 s at</u>  |                    | 0.5366                           | 0.000159       |
| <u>230298 at</u>    | MBLAC2             | 0.5368                           | 4.00E-07       |
| <u>209409 at</u>    | GRB10              | 0.5370                           | 0.000493       |
| <u>218795 at</u>    | ACP6               | 0.5374                           | 0.00026        |
| <u>212175 s at</u>  | AK2                | 0.5381                           | 0.000317       |

| <b>Probe set</b>    | <b>Gene Symbol</b> | <b>Fold-change:<br/>Low/High</b> | <b>P-value</b> |
|---------------------|--------------------|----------------------------------|----------------|
| <u>222750 s at</u>  | SRD5A3             | 0.5395                           | 9.31E-05       |
| <u>212174 at</u>    | AK2                | 0.5396                           | 0.000677       |
| <u>241991 at</u>    |                    | 0.5430                           | 5.94E-05       |
| <u>212413 at</u>    | SEPT6              | 0.5434                           | 2.27E-05       |
| <u>202502 at</u>    | ACADM              | 0.5436                           | 2.85E-05       |
| <u>229905 at</u>    | RAP1GDS1           | 0.5436                           | 3.06E-05       |
| <u>206272 at</u>    |                    | 0.5440                           | 1.80E-06       |
| <u>220658 s at</u>  | ARNTL2             | 0.5445                           | 0.000255       |
| <u>209268 at</u>    | VPS45              | 0.5448                           | 0.000538       |
| <u>213374 x at</u>  | HIBCH              | 0.5454                           | 0.000383       |
| <u>210154 at</u>    | ME2                | 0.5455                           | 0.000336       |
| <u>212922 s at</u>  | SMYD2              | 0.5462                           | 4.30E-06       |
| <u>223451 s at</u>  | CKLF               | 0.5465                           | 0.000678       |
| <u>228661 s at</u>  |                    | 0.5469                           | 0.000252       |
| <u>209911 x at</u>  | HIST1H2BD          | 0.5477                           | 0.000345       |
| <u>205996 s at</u>  | AK2                | 0.5484                           | 0.000516       |
| <u>225647 s at</u>  | CTSC               | 0.5487                           | 0.000151       |
| <u>209707 at</u>    | PIGK               | 0.5489                           | 0.000244       |
| <u>225835 at</u>    | SLC12A2            | 0.5491                           | 0.000723       |
| <u>203545 at</u>    | ALG8               | 0.5493                           | 9.17E-05       |
| <u>1557411 s at</u> | SLC25A43           | 0.5496                           | 0.00021        |
| <u>211300 s at</u>  | TP53               | 0.5500                           | 0.00023        |
| <u>215022 x at</u>  | ZNF33B             | 0.5514                           | 5.00E-07       |
| <u>229693 at</u>    | TMEM220            | 0.5516                           | 2.00E-07       |
| <u>222394 at</u>    | PDCD6IP            | 0.5520                           | 0.000327       |
| <u>228841 at</u>    | LYRM7              | 0.5535                           | 4.44E-05       |
| <u>228315 at</u>    |                    | 0.5537                           | 0.000428       |
| <u>202330 s at</u>  | UNG                | 0.5542                           | 0.000411       |
| <u>235010 at</u>    | LOC729013          | 0.5545                           | 5.08E-05       |
| <u>217892 s at</u>  | LIMA1              | 0.5549                           | 1.53E-05       |
| <u>228280 at</u>    | ZC3HAV1L           | 0.5553                           | 1.14E-05       |
| <u>224847 at</u>    | CDK6               | 0.5564                           | 4.87E-05       |
| <u>229402 at</u>    | SAMD13             | 0.5577                           | 0.000139       |
| <u>213677 s at</u>  | PMS1               | 0.5580                           | 0.000262       |
| <u>207627 s at</u>  | TFCP2              | 0.5590                           | 1.51E-05       |
| <u>203148 s at</u>  | TRIM14             | 0.5597                           | 0.000781       |
| <u>201563 at</u>    | SORD               | 0.5602                           | 0.000509       |
| <u>229210 at</u>    | RNASEH2B           | 0.5603                           | 0.000535       |
| <u>243904 at</u>    |                    | 0.5606                           | 0.000579       |
| <u>205078 at</u>    | PIGF               | 0.5611                           | 9.63E-05       |
| <u>203282 at</u>    | GBE1               | 0.5613                           | 9.10E-06       |
| <u>218477 at</u>    | TMEM14A            | 0.5615                           | 0.000738       |
| <u>222427 s at</u>  | LARS               | 0.5620                           | 0.000511       |
| <u>203360 s at</u>  | MYCBP              | 0.5628                           | 7.69E-05       |
| <u>204283 at</u>    | FARS2              | 0.5633                           | 0.000036       |
| <u>229983 at</u>    | TIGD2              | 0.5635                           | 0.000169       |
| <u>223100 s at</u>  | NUDT5              | 0.5637                           | 2.34E-05       |
| <u>233642 s at</u>  | HEATR5B            | 0.5638                           | 6.00E-07       |

| <b>Probe set</b>    | <b>Gene Symbol</b> | <b>Fold-change:<br/>Low/High</b> | <b>P-value</b> |
|---------------------|--------------------|----------------------------------|----------------|
| <u>227556 at</u>    |                    | 0.5645                           | 0.000875       |
| <u>217869 at</u>    | HSD17B12           | 0.5652                           | 1.06E-05       |
| <u>226537 at</u>    | HINT3              | 0.5660                           | 7.43E-05       |
| <u>200974 at</u>    | ACTA2              | 0.5666                           | 0.000319       |
| <u>212415 at</u>    | SEPT6              | 0.5666                           | 0.00011        |
| <u>227221 at</u>    |                    | 0.5674                           | 0.000135       |
| <u>204513 s at</u>  | ELMO1              | 0.5677                           | 7.00E-07       |
| <u>209421 at</u>    | MSH2               | 0.5677                           | 8.51E-05       |
| <u>205260 s at</u>  | ACYP1              | 0.5679                           | 0.000667       |
| <u>203711 s at</u>  | HIBCH              | 0.5682                           | 8.02E-05       |
| <u>235339 at</u>    | SETDB2             | 0.5684                           | 1.93E-05       |
| <u>224848 at</u>    | CDK6               | 0.5684                           | 0.000146       |
| <u>209175 at</u>    | SEC23IP            | 0.5688                           | 1.69E-05       |
| <u>201614 s at</u>  | RUVBL1             | 0.5693                           | 0.000375       |
| <u>213129 s at</u>  |                    | 0.5698                           | 0.000338       |
| <u>212653 s at</u>  | EHBP1              | 0.5703                           | 0.000156       |
| <u>208097 s at</u>  | TMX1               | 0.5705                           | 8.50E-06       |
| <u>224410 s at</u>  | LMBR1              | 0.5708                           | 3.20E-06       |
| <u>223087 at</u>    | ECHDC1             | 0.5708                           | 0.000732       |
| <u>224730 at</u>    | DCAF7              | 0.5710                           | 2.84E-05       |
| <u>201847 at</u>    | LIPA               | 0.5712                           | 0.000252       |
| <u>224959 at</u>    | SLC26A2            | 0.5713                           | 0.000748       |
| <u>229491 at</u>    | NHEDC2             | 0.5721                           | 0.000128       |
| <u>201487 at</u>    | CTSC               | 0.5722                           | 0.000288       |
| <u>201503 at</u>    | G3BP1              | 0.5727                           | 5.81E-05       |
| <u>219644 at</u>    | CCDC41             | 0.5730                           | 0.000154       |
| <u>202472 at</u>    | MPI                | 0.5734                           | 0.000144       |
| <u>219100 at</u>    | OBFC1              | 0.5736                           | 9.46E-05       |
| <u>1558770 a at</u> | PIK3R6             | 0.5740                           | 0.000423       |
| <u>231838 at</u>    | PABPC1L            | 0.5750                           | 0.000884       |
| <u>222209 s at</u>  | TMEM135            | 0.5752                           | 2.68E-05       |
| <u>226760 at</u>    | MBTPS2             | 0.5752                           | 0.000029       |
| <u>231955 s at</u>  | HIBADH             | 0.5753                           | 1.16E-05       |
| <u>205612 at</u>    | MMRN1              | 0.5757                           | 0.000416       |
| <u>226291 at</u>    | ALS2               | 0.5758                           | 0.00031        |
| <u>210338 s at</u>  | HSPA8              | 0.5762                           | 1.20E-06       |
| <u>213331 s at</u>  | NEK1               | 0.5766                           | 0.000051       |
| <u>227094 at</u>    | DHTKD1             | 0.5767                           | 0.00023        |
| <u>209509 s at</u>  | DPAGT1             | 0.5768                           | 9.34E-05       |
| <u>225114 at</u>    | AGPS               | 0.5769                           | 3.61E-05       |
| <u>225040 s at</u>  | RPE                | 0.5772                           | 0.000398       |
| <u>220741 s at</u>  | PPA2               | 0.5774                           | 0.000165       |
| <u>224722 at</u>    | MIB1               | 0.5776                           | 0.000109       |
| <u>206295 at</u>    | IL18               | 0.5776                           | 7.23E-05       |
| <u>233924 s at</u>  | EXOC6              | 0.5777                           | 8.00E-07       |
| <u>236769 at</u>    | LOC158402          | 0.5778                           | 7.07E-05       |
| <u>226532 at</u>    |                    | 0.5788                           | 6.22E-05       |
| <u>204045 at</u>    | TCEAL1             | 0.5790                           | 3.90E-06       |

| <b>Probe set</b>    | <b>Gene Symbol</b> | <b>Fold-change:<br/>Low/High</b> | <b>P-value</b> |
|---------------------|--------------------|----------------------------------|----------------|
| <u>222416 at</u>    | ALDH18A1           | 0.5795                           | 0.000562       |
| <u>221589 s at</u>  | ALDH6A1            | 0.5796                           | 0.000578       |
| <u>220668 s at</u>  | DNMT3B             | 0.5801                           | 0.000203       |
| <u>204341 at</u>    | TRIM16             | 0.5802                           | 0.000227       |
| <u>1555526 a at</u> | SEPT6              | 0.5803                           | 4.57E-05       |
| <u>208875 s at</u>  | PAK2               | 0.5805                           | 3.45E-05       |
| <u>228167 at</u>    | KLHL6              | 0.5805                           | 0.0003         |
| <u>202749 at</u>    | WRB                | 0.5806                           | 3.32E-05       |
| <u>210317 s at</u>  | YWHAE              | 0.5809                           | 9.92E-05       |
| <u>216202 s at</u>  | SPTLC2             | 0.5810                           | 0.000796       |
| <u>203551 s at</u>  | COX11              | 0.5823                           | 0.000326       |
| <u>206544 x at</u>  | SMARCA2            | 0.5823                           | 1.28E-05       |
| <u>227722 at</u>    | RPS23              | 0.5829                           | 0.000298       |
| <u>202371 at</u>    | TCEAL4             | 0.5835                           | 0.000305       |
| <u>210347 s at</u>  | BCL11A             | 0.5841                           | 0.00012        |
| <u>222632 s at</u>  | LZTFL1             | 0.5846                           | 2.90E-06       |
| <u>226432 at</u>    | ETNK1              | 0.5857                           | 3.42E-05       |
| <u>201892 s at</u>  | IMPDH2             | 0.5861                           | 0.00018        |
| <u>232101 s at</u>  | PIGN               | 0.5863                           | 0.000123       |
| <u>1557910 at</u>   | HSP90AB1           | 0.5869                           | 4.79E-05       |
| <u>1554480 a at</u> | ARMC10             | 0.5872                           | 0.000754       |
| <u>218147 s at</u>  | GLT8D1             | 0.5875                           | 0.000253       |
| <u>219083 at</u>    | SHQ1               | 0.5876                           | 2.49E-05       |
| <u>218842 at</u>    | RPAP3              | 0.5878                           | 2.42E-05       |
| <u>223330 s at</u>  | SUGT1              | 0.5885                           | 1.00E-07       |
| <u>227785 at</u>    | SDCCAG8            | 0.5888                           | 0.000308       |
| <u>210519 s at</u>  | NQO1               | 0.5898                           | 4.15E-05       |
| <u>243000 at</u>    | CDK6               | 0.5899                           | 0.000451       |
| <u>209143 s at</u>  | CLNS1A             | 0.5900                           | 0.000179       |
| <u>208393 s at</u>  | RAD50              | 0.5901                           | 5.81E-05       |
| <u>219055 at</u>    | SRBD1              | 0.5903                           | 3.38E-05       |
| <u>219628 at</u>    | ZMAT3              | 0.5918                           | 0.000983       |
| <u>217294 s at</u>  | ENO1               | 0.5928                           | 0.000415       |
| <u>226482 s at</u>  |                    | 0.5931                           | 0.000352       |
| <u>218983 at</u>    | C1RL               | 0.5935                           | 0.000293       |
| <u>1554667 s at</u> | METTL8             | 0.5937                           | 8.60E-06       |
| <u>219834 at</u>    | ALS2CR8            | 0.5938                           | 5.40E-06       |
| <u>213189 at</u>    |                    | 0.5939                           | 0.000205       |
| <u>203817 at</u>    | GUCY1B3            | 0.5939                           | 0.000943       |
| <u>203367 at</u>    | DUSP14             | 0.5943                           | 0.000055       |
| <u>227158 at</u>    | C14orf126          | 0.5946                           | 4.42E-05       |
| <u>212110 at</u>    | SLC39A14           | 0.5951                           | 0.000795       |
| <u>202438 x at</u>  | IDS                | 0.5951                           | 0.000047       |
| <u>214697 s at</u>  | ROD1               | 0.5952                           | 1.15E-05       |
| <u>215143 at</u>    | DPY19L2P2          | 0.5965                           | 0.000341       |
| <u>228249 at</u>    | C11orf74           | 0.5969                           | 2.61E-05       |
| <u>209444 at</u>    | RAP1GDS1           | 0.5973                           | 7.04E-05       |
| <u>201564 s at</u>  | FSCN1              | 0.5976                           | 0.00066        |

| <b>Probe set</b>    | <b>Gene Symbol</b> | <b>Fold-change:<br/>Low/High</b> | <b>P-value</b> |
|---------------------|--------------------|----------------------------------|----------------|
| <u>203359 s at</u>  | MYCBP              | 0.5984                           | 2.72E-05       |
| <u>222388 s at</u>  | VPS35              | 0.5984                           | 0.000101       |
| <u>209349 at</u>    | RAD50              | 0.5986                           | 0.000428       |
| <u>218792 s at</u>  | BSPRY              | 0.5994                           | 3.10E-06       |
| <u>233543 s at</u>  | FAM175A            | 0.5997                           | 0.000135       |
| <u>227157 at</u>    | CCDC111            | 0.5998                           | 0.000495       |
| <u>211569 s at</u>  | HADH               | 0.6000                           | 0.00041        |
| <u>204333 s at</u>  | AGA                | 0.6003                           | 0.000527       |
| <u>217791 s at</u>  | ALDH18A1           | 0.6005                           | 0.000148       |
| <u>209123 at</u>    | QDPR               | 0.6005                           | 0.000443       |
| <u>220985 s at</u>  | RNF170             | 0.6008                           | 2.65E-05       |
| <u>223328 at</u>    | ARMC10             | 0.6010                           | 1.26E-05       |
| <u>235780 at</u>    | PRKACB             | 0.6011                           | 0.000575       |
| <u>238488 at</u>    | LRRC70             | 0.6016                           | 0.000287       |
| <u>200604 s at</u>  | PRKAR1A            | 0.6016                           | 9.09E-05       |
| <u>213391 at</u>    | DPY19L4            | 0.6020                           | 0.000347       |
| <u>212121 at</u>    | TCTN3              | 0.6023                           | 2.90E-06       |
| <u>222559 s at</u>  | RPRD1A             | 0.6024                           | 0.000831       |
| <u>242157 at</u>    | CHD9               | 0.6025                           | 0.000169       |
| <u>219008 at</u>    | C2orf43            | 0.6027                           | 0.000954       |
| <u>225366 at</u>    | PGM2               | 0.6028                           | 1.94E-05       |
| <u>203069 at</u>    | SV2A               | 0.6028                           | 0.000281       |
| <u>209806 at</u>    | HIST1H2BK          | 0.6039                           | 0.000548       |
| <u>200841 s at</u>  | EPRS               | 0.6039                           | 2.00E-07       |
| <u>219924 s at</u>  | ZMYM6              | 0.6040                           | 0.000506       |
| <u>219204 s at</u>  | SRR                | 0.6045                           | 6.80E-06       |
| <u>1555830 s at</u> | ESYT2              | 0.6052                           | 8.11E-05       |
| <u>223403 s at</u>  | POLR1B             | 0.6053                           | 1.20E-06       |
| <u>228006 at</u>    |                    | 0.6055                           | 0.000623       |
| <u>218123 at</u>    | C21orf59           | 0.6059                           | 0.000119       |
| <u>208817 at</u>    | COMT               | 0.6062                           | 0.000516       |
| <u>218170 at</u>    | ISOC1              | 0.6064                           | 0.000494       |
| <u>225769 at</u>    | COG6               | 0.6065                           | 0.000146       |
| <u>225367 at</u>    | PGM2               | 0.6068                           | 3.34E-05       |
| <u>218504 at</u>    | FAHD2A             | 0.6070                           | 0.000223       |
| <u>218643 s at</u>  | CRIP1              | 0.6071                           | 1.17E-05       |
| <u>221104 s at</u>  | NIPSNAP3B          | 0.6074                           | 6.83E-05       |
| <u>208687 x at</u>  | HSPA8              | 0.6077                           | 5.01E-05       |
| <u>223306 at</u>    | EBPL               | 0.6079                           | 0.000147       |
| <u>224392 s at</u>  | OPN3               | 0.6082                           | 0.000905       |
| <u>228045 at</u>    |                    | 0.6088                           | 7.62E-05       |
| <u>225225 at</u>    | LOC729082          | 0.6099                           | 9.48E-05       |
| <u>201746 at</u>    | TP53               | 0.6102                           | 0.000518       |
| <u>206506 s at</u>  | SUPT3H             | 0.6102                           | 1.70E-06       |
| <u>219757 s at</u>  | C14orf101          | 0.6104                           | 0.000255       |
| <u>201448 at</u>    | TIA1               | 0.6107                           | 0.000817       |
| <u>212946 at</u>    | KIAA0564           | 0.6110                           | 0.000094       |
| <u>204226 at</u>    | STAU2              | 0.6112                           | 0.000555       |

| <b>Probe set</b>    | <b>Gene Symbol</b> | <b>Fold-change:<br/>Low/High</b> | <b>P-value</b> |
|---------------------|--------------------|----------------------------------|----------------|
| <u>210667 s at</u>  | C21orf33           | 0.6112                           | 0.000525       |
| <u>206542 s at</u>  | SMARCA2            | 0.6113                           | 0.000122       |
| <u>220954 s at</u>  | PILRB              | 0.6116                           | 2.04E-05       |
| <u>218561 s at</u>  | LYRM4              | 0.6121                           | 9.02E-05       |
| <u>36830 at</u>     | MIPEP              | 0.6125                           | 4.31E-05       |
| <u>237291 at</u>    | NCRNA00117         | 0.6128                           | 0.000029       |
| <u>1559052 s at</u> | PAK2               | 0.6129                           | 0.000027       |
| <u>220606 s at</u>  | C17orf48           | 0.6130                           | 1.75E-05       |
| <u>213461 at</u>    | NUDT21             | 0.6130                           | 8.40E-06       |
| <u>222893 s at</u>  | RPAP2              | 0.6131                           | 5.40E-06       |
| <u>1554660 a at</u> | C1orf71            | 0.6133                           | 1.28E-05       |
| <u>221745 at</u>    | DCAF7              | 0.6136                           | 0.000174       |
| <u>218503 at</u>    | KIAA1797           | 0.6138                           | 0.000424       |
| <u>224204 x at</u>  | ARNTL2             | 0.6144                           | 0.000107       |
| <u>201054 at</u>    | HNRNPA0            | 0.6145                           | 0.000201       |
| <u>227808 at</u>    | DNAJC15            | 0.6147                           | 0.000131       |
| <u>217900 at</u>    | IARS2              | 0.6147                           | 1.78E-05       |
| <u>224523 s at</u>  | C3orf26            | 0.6152                           | 0.00044        |
| <u>210786 s at</u>  | FLI1               | 0.6152                           | 0.000225       |
| <u>231808 at</u>    | LOC729082          | 0.6152                           | 9.30E-06       |
| <u>232423 at</u>    | ARSD               | 0.6153                           | 0.000884       |
| <u>220172 at</u>    | DCAF17             | 0.6156                           | 3.20E-06       |
| <u>218713 at</u>    | NARG2              | 0.6156                           | 6.54E-05       |
| <u>219017 at</u>    | ETNK1              | 0.6157                           | 0.000814       |
| <u>201675 at</u>    | AKAP1              | 0.6158                           | 0.000438       |
| <u>228781 at</u>    | OBFC1              | 0.6159                           | 2.40E-06       |
| <u>223892 s at</u>  | TMBIM4             | 0.6159                           | 0.000809       |
| <u>208818 s at</u>  | COMT               | 0.6160                           | 0.000999       |
| <u>222845 x at</u>  | TMBIM4             | 0.6161                           | 0.000785       |
| <u>212257 s at</u>  | SMARCA2            | 0.6163                           | 1.24E-05       |
| <u>224187 x at</u>  | HSPA8              | 0.6164                           | 3.91E-05       |
| <u>244050 at</u>    | PTPLAD2            | 0.6166                           | 0.000598       |
| <u>221934 s at</u>  | DALRD3             | 0.6167                           | 1.10E-06       |
| <u>209623 at</u>    | MCCC2              | 0.6168                           | 5.46E-05       |
| <u>223114 at</u>    | COQ5               | 0.6169                           | 0.000145       |
| <u>209539 at</u>    | ARHGEF6            | 0.6170                           | 0.000148       |
| <u>214298 x at</u>  | SEPT6              | 0.6170                           | 8.35E-05       |
| <u>1557302 at</u>   |                    | 0.6176                           | 1.06E-05       |
| <u>218069 at</u>    | DCTPP1             | 0.6180                           | 0.000195       |
| <u>218163 at</u>    | MCTS1              | 0.6182                           | 0.000212       |
| <u>228062 at</u>    | NAPIL5             | 0.6189                           | 0.000346       |
| <u>209849 s at</u>  | RAD51C             | 0.6189                           | 0.000741       |
| <u>202713 s at</u>  | KIAA0391           | 0.6193                           | 9.00E-07       |
| <u>221618 s at</u>  | TAF9B              | 0.6193                           | 0.000239       |
| <u>221864 at</u>    | ORAI3              | 0.6193                           | 0.000128       |
| <u>211761 s at</u>  | CACYBP             | 0.6198                           | 2.01E-05       |
| <u>218322 s at</u>  | ACSL5              | 0.6208                           | 0.000875       |
| <u>203581 at</u>    | RAB4A              | 0.6210                           | 2.56E-05       |



| <b>Probe set</b>    | <b>Gene Symbol</b> | <b>Fold-change:<br/>Low/High</b> | <b>P-value</b> |
|---------------------|--------------------|----------------------------------|----------------|
| <u>224916 at</u>    | TMEM173            | 0.6211                           | 0.000021       |
| <u>217990 at</u>    | GMPR2              | 0.6213                           | 0.000154       |
| <u>204091 at</u>    | PDE6D              | 0.6217                           | 0.000348       |
| <u>224060 s at</u>  | DPH5               | 0.6222                           | 0.000178       |
| <u>212211 at</u>    | ANKRD17            | 0.6222                           | 5.76E-05       |
| <u>200046 at</u>    | DAD1               | 0.6223                           | 0.00025        |
| <u>228719 at</u>    | ZSWIM7             | 0.6224                           | 0.00024        |
| <u>210541 s at</u>  | TRIM27             | 0.6227                           | 4.75E-05       |
| <u>228077 at</u>    | MRI1               | 0.6227                           | 1.07E-05       |
| <u>208758 at</u>    | ATIC               | 0.6229                           | 0.000337       |
| <u>232790 at</u>    |                    | 0.6229                           | 1.52E-05       |
| <u>223272 s at</u>  | C1orf57            | 0.6232                           | 0.000668       |
| <u>212145 at</u>    | MRPS27             | 0.6233                           | 3.80E-06       |
| <u>206976 s at</u>  | HSPH1              | 0.6234                           | 0.00094        |
| <u>223245 at</u>    | STRBP              | 0.6238                           | 0.000505       |
| <u>224185 at</u>    |                    | 0.6238                           | 0.000066       |
| <u>201036 s at</u>  | HADH               | 0.6240                           | 0.000889       |
| <u>218870 at</u>    | ARHGAP15           | 0.6240                           | 8.57E-05       |
| <u>224748 at</u>    | DCAF7              | 0.6244                           | 0.000042       |
| <u>1566472 s at</u> | RETSAT             | 0.6249                           | 8.90E-06       |
| <u>1552310 at</u>   | C15orf40           | 0.6249                           | 1.94E-05       |
| <u>227534 at</u>    | C9orf21            | 0.6252                           | 0.000284       |
| <u>204807 at</u>    | TMEM5              | 0.6253                           | 7.01E-05       |
| <u>221564 at</u>    | PRMT2              | 0.6254                           | 0.000205       |
| <u>209916 at</u>    | DHTKD1             | 0.6258                           | 0.000167       |
| <u>226455 at</u>    | CREB3L4            | 0.6260                           | 0.000157       |
| <u>222369 at</u>    | NAT11              | 0.6261                           | 9.76E-05       |
| <u>234111 at</u>    |                    | 0.6263                           | 0.000744       |
| <u>211727 s at</u>  | COX11              | 0.6264                           | 0.000247       |
| <u>209624 s at</u>  | MCCC2              | 0.6266                           | 4.00E-07       |
| <u>205297 s at</u>  | CD79B              | 0.6266                           | 0.000426       |
| <u>222532 at</u>    | SRPRB              | 0.6269                           | 0.000115       |
| <u>228620 at</u>    |                    | 0.6270                           | 0.000238       |
| <u>221689 s at</u>  | PIGP               | 0.6274                           | 8.51E-05       |
| <u>226531 at</u>    | ORAI1              | 0.6275                           | 0.000308       |
| <u>1555193 a at</u> | ZNF277             | 0.6277                           | 0.000133       |
| <u>234975 at</u>    | GSPT1              | 0.6284                           | 0.000236       |
| <u>226479 at</u>    | KBTD6              | 0.6285                           | 0.000102       |
| <u>217627 at</u>    | ZNF573             | 0.6285                           | 0.000656       |
| <u>208608 s at</u>  | SNTB1              | 0.6287                           | 0.0006         |
| <u>222785 x at</u>  | C11orf1            | 0.6287                           | 0.000143       |
| <u>226361 at</u>    |                    | 0.6287                           | 0.000763       |
| <u>202429 s at</u>  | PPP3CA             | 0.6288                           | 0.000227       |
| <u>204808 s at</u>  | TMEM5              | 0.6288                           | 8.23E-05       |
| <u>212568 s at</u>  | DLAT               | 0.6290                           | 4.10E-06       |
| <u>224881 at</u>    | VKORC1L1           | 0.6293                           | 1.24E-05       |
| <u>224173 s at</u>  | MRPL30             | 0.6293                           | 1.22E-05       |
| <u>209150 s at</u>  | TM9SF1             | 0.6295                           | 0.000107       |

| <b>Probe set</b>    | <b>Gene Symbol</b> | <b>Fold-change:<br/>Low/High</b> | <b>P-value</b> |
|---------------------|--------------------|----------------------------------|----------------|
| <u>204305 at</u>    | MIPEP              | 0.6295                           | 7.80E-06       |
| <u>225520 at</u>    | MTHFD1L            | 0.6297                           | 0.000649       |
| <u>217809 at</u>    | BZW2               | 0.6299                           | 0.000283       |
| <u>230370 x at</u>  | STYXL1             | 0.6299                           | 0.000548       |
| <u>214995 s at</u>  |                    | 0.6304                           | 2.48E-05       |
| <u>202444 s at</u>  | ERLIN1             | 0.6306                           | 0.000622       |
| <u>223057 s at</u>  | XPO5               | 0.6306                           | 1.30E-06       |
| <u>205133 s at</u>  | HSPE1              | 0.6307                           | 4.26E-05       |
| <u>218338 at</u>    | PHC1               | 0.6307                           | 0.000388       |
| <u>218209 s at</u>  | RPRD1A             | 0.6310                           | 0.000289       |
| <u>208910 s at</u>  | C1QBP              | 0.6311                           | 3.82E-05       |
| <u>242794 at</u>    | MAML3              | 0.6311                           | 0.00036        |
| <u>211563 s at</u>  | C19orf2            | 0.6314                           | 6.46E-05       |
| <u>213685 at</u>    |                    | 0.6315                           | 9.00E-06       |
| <u>228113 at</u>    | RAB37              | 0.6315                           | 0.00083        |
| <u>209512 at</u>    | HSDL2              | 0.6317                           | 1.11E-05       |
| <u>219002 at</u>    | FASTKD1            | 0.6317                           | 0.00025        |
| <u>212731 at</u>    | ANKRD46            | 0.6320                           | 0.000842       |
| <u>1552978 a at</u> | SCAMP1             | 0.6320                           | 9.00E-07       |
| <u>202529 at</u>    | PRPSAP1            | 0.6321                           | 9.70E-06       |
| <u>201037 at</u>    | PFKP               | 0.6322                           | 0.000642       |
| <u>227925 at</u>    | FLJ39051           | 0.6323                           | 0.000236       |
| <u>219217 at</u>    | NARS2              | 0.6327                           | 7.90E-06       |
| <u>213737 x at</u>  | GOLGA9P            | 0.6328                           | 0.000256       |
| <u>231576 at</u>    |                    | 0.6333                           | 0.000295       |
| <u>200806 s at</u>  | HSPD1              | 0.6333                           | 0.00054        |
| <u>220500 s at</u>  |                    | 0.6335                           | 0.000138       |
| <u>218321 x at</u>  | STYXL1             | 0.6336                           | 0.000238       |
| <u>223335 at</u>    | TMEM69             | 0.6339                           | 2.28E-05       |
| <u>202013 s at</u>  | EXT2               | 0.6339                           | 4.42E-05       |
| <u>233982 x at</u>  | STYXL1             | 0.6341                           | 0.000389       |
| <u>216392 s at</u>  | SEC23IP            | 0.6344                           | 2.00E-06       |
| <u>223212 at</u>    | ZDHHC16            | 0.6345                           | 0.000482       |
| <u>209476 at</u>    | TMX1               | 0.6346                           | 0.000144       |
| <u>217786 at</u>    | PRMT5              | 0.6347                           | 0.000292       |
| <u>226688 at</u>    | C3orf23            | 0.6349                           | 0.000472       |
| <u>225501 at</u>    | PHF6               | 0.6352                           | 8.89E-05       |
| <u>226458 at</u>    |                    | 0.6352                           | 0.000706       |
| <u>224623 at</u>    |                    | 0.6353                           | 0.00003        |
| <u>1554661 s at</u> | C1orf71            | 0.6353                           | 7.70E-06       |
| <u>219641 at</u>    | DET1               | 0.6353                           | 0.000253       |
| <u>201825 s at</u>  | SCCPDH             | 0.6354                           | 9.93E-05       |
| <u>208848 at</u>    | ADH5               | 0.6355                           | 0.000024       |
| <u>206833 s at</u>  | ACYP2              | 0.6355                           | 5.33E-05       |
| <u>209397 at</u>    | ME2                | 0.6355                           | 0.000271       |
| <u>208644 at</u>    | PARP1              | 0.6357                           | 6.47E-05       |
| <u>227451 s at</u>  | CCDC90A            | 0.6359                           | 1.02E-05       |
| <u>235840 at</u>    |                    | 0.6360                           | 4.14E-05       |

| <b>Probe set</b>   | <b>Gene Symbol</b> | <b>Fold-change:<br/>Low/High</b> | <b>P-value</b> |
|--------------------|--------------------|----------------------------------|----------------|
| <u>235088 at</u>   | C4orf46            | 0.6360                           | 0.00041        |
| <u>205395 s at</u> | MRE11A             | 0.6361                           | 0.000131       |
| <u>225039 at</u>   | RPE                | 0.6361                           | 6.75E-05       |
| <u>213761 at</u>   | MDM1               | 0.6361                           | 0.000535       |
| <u>224879 at</u>   | C9orf123           | 0.6364                           | 0.000453       |
| <u>203049 s at</u> | TTC37              | 0.6365                           | 0.000115       |
| <u>228937 at</u>   | C13orf31           | 0.6366                           | 0.000318       |
| <u>222744 s at</u> | TMLHE              | 0.6367                           | 0.000468       |
| <u>205129 at</u>   | NPM3               | 0.6367                           | 7.55E-05       |
| <u>204565 at</u>   | ACOT13             | 0.6380                           | 0.000262       |
| <u>211704 s at</u> |                    | 0.6384                           | 4.27E-05       |
| <u>219307 at</u>   | PDSS2              | 0.6384                           | 0.000785       |
| <u>210482 x at</u> | MAP2K5             | 0.6384                           | 2.37E-05       |
| <u>218471 s at</u> | BBS1               | 0.6389                           | 1.60E-06       |
| <u>204683 at</u>   | ICAM2              | 0.6392                           | 0.000489       |
| <u>215380 s at</u> | GGCT               | 0.6393                           | 5.01E-05       |
| <u>223586 at</u>   | ARNTL2             | 0.6393                           | 2.48E-05       |
| <u>217957 at</u>   | C16orf80           | 0.6394                           | 0.00022        |
| <u>226116 at</u>   |                    | 0.6399                           | 3.86E-05       |
| <u>204040 at</u>   | RNF144A            | 0.6403                           | 0.000693       |
| <u>201619 at</u>   | PRDX3              | 0.6410                           | 0.000203       |
| <u>217457 s at</u> | RAP1GDS1           | 0.6411                           | 1.17E-05       |
| <u>212893 at</u>   | ZZZ3               | 0.6413                           | 3.50E-06       |
| <u>217788 s at</u> | GALNT2             | 0.6415                           | 0.000106       |
| <u>229189 s at</u> |                    | 0.6417                           | 0.000115       |
| <u>230598 at</u>   |                    | 0.6420                           | 0.000168       |
| <u>227796 at</u>   | ZFP62              | 0.6420                           | 6.19E-05       |
| <u>203829 at</u>   | ELP4               | 0.6421                           | 0.000647       |
| <u>217707 x at</u> | SMARCA2            | 0.6423                           | 0.000285       |
| <u>212510 at</u>   | GPD1L              | 0.6423                           | 0.000305       |
| <u>229810 at</u>   |                    | 0.6423                           | 0.000152       |
| <u>228714 at</u>   |                    | 0.6425                           | 0.000703       |
| <u>210567 s at</u> | SKP2               | 0.6430                           | 0.000703       |
| <u>226521 s at</u> | FAM175A            | 0.6430                           | 0.00009        |
| <u>201872 s at</u> | ABCE1              | 0.6431                           | 4.99E-05       |
| <u>203972 s at</u> | PEX3               | 0.6432                           | 0.000046       |
| <u>234304 s at</u> | IPO11              | 0.6434                           | 1.10E-06       |
| <u>213188 s at</u> | MINA               | 0.6436                           | 0.000815       |
| <u>222418 s at</u> | TMEM43             | 0.6437                           | 1.30E-06       |
| <u>226779 at</u>   |                    | 0.6438                           | 0.000288       |
| <u>235036 at</u>   | LIX1L              | 0.6439                           | 6.95E-05       |
| <u>223273 at</u>   | C14orf142          | 0.6441                           | 6.55E-05       |
| <u>224819 at</u>   | TCEAL8             | 0.6441                           | 0.000132       |
| <u>219575 s at</u> |                    | 0.6444                           | 1.80E-06       |
| <u>202930 s at</u> | SUCLA2             | 0.6445                           | 0.000286       |
| <u>223764 x at</u> | NIPSNAP3B          | 0.6447                           | 0.000871       |
| <u>201831 s at</u> | USO1               | 0.6448                           | 3.16E-05       |
| <u>216591 s at</u> |                    | 0.6450                           | 2.78E-05       |

| <b>Probe set</b>   | <b>Gene Symbol</b> | <b>Fold-change:<br/>Low/High</b> | <b>P-value</b> |
|--------------------|--------------------|----------------------------------|----------------|
| <u>208653 s at</u> | CD164              | 0.6450                           | 4.23E-05       |
| <u>204960 at</u>   | PTPRCAP            | 0.6451                           | 0.000904       |
| <u>207618 s at</u> | BCS1L              | 0.6454                           | 0.00019        |
| <u>225029 at</u>   | LOC550643          | 0.6455                           | 5.60E-06       |
| <u>222731 at</u>   | ZDHHC2             | 0.6457                           | 0.000707       |
| <u>205401 at</u>   | AGPS               | 0.6459                           | 1.13E-05       |
| <u>225321 s at</u> | PILRB              | 0.6465                           | 0.000173       |
| <u>210978 s at</u> | TAGLN2             | 0.6466                           | 5.73E-05       |
| <u>204354 at</u>   | POT1               | 0.6470                           | 7.91E-05       |
| <u>221213 s at</u> | ZNF280D            | 0.6470                           | 0.000203       |
| <u>203465 at</u>   | MRPL19             | 0.6472                           | 0.000131       |
| <u>238590 x at</u> | TMEM107            | 0.6472                           | 0.000744       |
| <u>202579 x at</u> | HMGN4              | 0.6473                           | 0.000074       |
| <u>226259 at</u>   | EXOC6              | 0.6474                           | 0.000454       |
| <u>206445 s at</u> | PRMT1              | 0.6475                           | 0.000718       |
| <u>225675 at</u>   | C14orf101          | 0.6475                           | 0.000785       |
| <u>211370 s at</u> | MAP2K5             | 0.6480                           | 9.50E-06       |
| <u>206958 s at</u> | UPF3A              | 0.6482                           | 2.87E-05       |
| <u>209338 at</u>   | TFCP2              | 0.6484                           | 0.000198       |
| <u>205283 at</u>   | FKTN               | 0.6487                           | 0.000291       |
| <u>210114 at</u>   | INVS               | 0.6488                           | 3.82E-05       |
| <u>200848 at</u>   | AHCYL1             | 0.6490                           | 5.40E-06       |
| <u>209786 at</u>   | HMGN4              | 0.6490                           | 0.000202       |
| <u>219342 at</u>   | CASD1              | 0.6491                           | 0.000342       |
| <u>230152 at</u>   | WDR52              | 0.6493                           | 0.000451       |
| <u>223281 s at</u> | COX15              | 0.6493                           | 9.19E-05       |
| <u>207223 s at</u> | ROD1               | 0.6500                           | 0.0002         |
| <u>209434 s at</u> | PPAT               | 0.6501                           | 0.000017       |
| <u>235134 at</u>   |                    | 0.6502                           | 0.000648       |
| <u>203621 at</u>   | NDUFB5             | 0.6503                           | 9.65E-05       |
| <u>1569503 at</u>  | HEATR5B            | 0.6503                           | 0.00057        |
| <u>205652 s at</u> | TTL1               | 0.6506                           | 0.000613       |
| <u>214966 at</u>   | GRIK5              | 0.6509                           | 6.33E-05       |
| <u>202889 x at</u> | MAP7               | 0.6510                           | 0.000411       |
| <u>201514 s at</u> | G3BP1              | 0.6512                           | 3.50E-06       |
| <u>222579 at</u>   | UBA5               | 0.6514                           | 5.87E-05       |
| <u>202562 s at</u> | C14orf1            | 0.6518                           | 1.99E-05       |
| <u>218930 s at</u> | TMEM106B           | 0.6520                           | 0.000983       |
| <u>200890 s at</u> | SSR1               | 0.6520                           | 0.000335       |
| <u>231319 x at</u> | KIF9               | 0.6521                           | 0.000706       |
| <u>218568 at</u>   | AGK                | 0.6525                           | 4.90E-06       |
| <u>209958 s at</u> | BBS9               | 0.6528                           | 0.00022        |
| <u>214359 s at</u> | HSP90AB1           | 0.6530                           | 0.000118       |
| <u>201259 s at</u> | SYPL1              | 0.6534                           | 7.00E-06       |
| <u>226816 s at</u> | KIAA1143           | 0.6534                           | 0.000393       |
| <u>222387 s at</u> | VPS35              | 0.6535                           | 4.75E-05       |
| <u>218973 at</u>   | EFTUD1             | 0.6536                           | 9.10E-06       |
| <u>223493 at</u>   | FBXO4              | 0.6538                           | 0.000163       |

| <b>Probe set</b>   | <b>Gene Symbol</b> | <b>Fold-change:<br/>Low/High</b> | <b>P-value</b> |
|--------------------|--------------------|----------------------------------|----------------|
| <u>226912 at</u>   | ZDHHC23            | 0.6540                           | 0.000699       |
| <u>228730 s at</u> | SCRN2              | 0.6541                           | 8.94E-05       |
| <u>200605 s at</u> | PRKAR1A            | 0.6542                           | 0.000264       |
| <u>221532 s at</u> | WDR61              | 0.6543                           | 2.15E-05       |
| <u>235260 s at</u> | PACRGL             | 0.6543                           | 1.49E-05       |
| <u>200760 s at</u> | ARL6IP5            | 0.6545                           | 0.00041        |
| <u>217949 s at</u> | VKORC1             | 0.6546                           | 0.000784       |
| <u>224576 at</u>   | ERGIC1             | 0.6547                           | 0.000168       |
| <u>201708 s at</u> | NIPSNAP1           | 0.6548                           | 6.21E-05       |
| <u>229058 at</u>   | ANKRD16            | 0.6548                           | 8.05E-05       |
| <u>223361 at</u>   | C6orf115           | 0.6550                           | 0.000231       |
| <u>213012 at</u>   | NEDD4              | 0.6551                           | 0.000532       |
| <u>231819 at</u>   |                    | 0.6553                           | 0.000112       |
| <u>203517 at</u>   | MTX2               | 0.6553                           | 0.000298       |
| <u>201135 at</u>   | ECHS1              | 0.6553                           | 0.000856       |
| <u>225804 at</u>   | CYB5D2             | 0.6555                           | 5.10E-06       |
| <u>208478 s at</u> | BAX                | 0.6555                           | 0.000349       |
| <u>229126 at</u>   | TMEM19             | 0.6556                           | 0.000363       |
| <u>235273 at</u>   | DYX1C1             | 0.6559                           | 0.00057        |
| <u>225793 at</u>   | LIX1L              | 0.6562                           | 4.82E-05       |
| <u>225050 at</u>   | ZNF512             | 0.6564                           | 0.000671       |
| <u>231530 s at</u> | C11orf1            | 0.6565                           | 7.06E-05       |
| <u>218957 s at</u> | PAAF1              | 0.6565                           | 0.000316       |
| <u>224699 s at</u> | ESYT2              | 0.6566                           | 4.80E-06       |
| <u>228063 s at</u> | NAP1L5             | 0.6567                           | 0.000658       |
| <u>222713 s at</u> | FANCF              | 0.6568                           | 0.00049        |
| <u>201339 s at</u> | SCP2               | 0.6570                           | 4.47E-05       |
| <u>224436 s at</u> | NIPSNAP3A          | 0.6575                           | 0.000541       |
| <u>221744 at</u>   | DCAF7              | 0.6576                           | 0.000169       |
| <u>211733 x at</u> | SCP2               | 0.6576                           | 0.000453       |
| <u>212217 at</u>   | PREPL              | 0.6579                           | 0.000577       |
| <u>223888 s at</u> | LARS               | 0.6579                           | 0.000254       |
| <u>218970 s at</u> | CUTC               | 0.6579                           | 2.28E-05       |
| <u>226781 at</u>   |                    | 0.6584                           | 0.000115       |
| <u>200973 s at</u> | TSPAN3             | 0.6586                           | 0.00013        |
| <u>202645 s at</u> | MEN1               | 0.6589                           | 6.58E-05       |
| <u>37793 r at</u>  | RAD51L3            | 0.6590                           | 3.34E-05       |
| <u>224798 s at</u> | C15orf17           | 0.6590                           | 7.26E-05       |
| <u>218351 at</u>   | COMMD8             | 0.6591                           | 0.000222       |
| <u>219819 s at</u> | MRPS28             | 0.6594                           | 6.89E-05       |
| <u>204119 s at</u> | ADK                | 0.6596                           | 0.000196       |
| <u>219166 at</u>   | C14orf104          | 0.6602                           | 0.000212       |
| <u>233999 s at</u> | TTC26              | 0.6602                           | 8.00E-07       |
| <u>238440 at</u>   | CLYBL              | 0.6604                           | 0.000867       |
| <u>241946 at</u>   | ZDHHC21            | 0.6605                           | 3.67E-05       |
| <u>202069 s at</u> | IDH3A              | 0.6609                           | 0.000457       |
| <u>225959 s at</u> | ZNRF1              | 0.6610                           | 0.0009         |
| <u>209796 s at</u> | CNPY2              | 0.6613                           | 0.000796       |

| <b>Probe set</b>    | <b>Gene Symbol</b> | <b>Fold-change:<br/>Low/High</b> | <b>P-value</b> |
|---------------------|--------------------|----------------------------------|----------------|
| <u>204178_s_at</u>  | RBM14              | 0.6613                           | 0.000166       |
| <u>201836_s_at</u>  | SUPT7L             | 0.6614                           | 0.000173       |
| <u>222640_at</u>    | DNMT3A             | 0.6615                           | 0.000978       |
| <u>225335_at</u>    | ZNF496             | 0.6615                           | 0.00016        |
| <u>210125_s_at</u>  | BANF1              | 0.6616                           | 0.000896       |
| <u>213133_s_at</u>  | GCSH               | 0.6616                           | 0.000271       |
| <u>221531_at</u>    | WDR61              | 0.6617                           | 7.23E-05       |
| <u>1552733_at</u>   | KLHDC1             | 0.6620                           | 0.000314       |
| <u>218545_at</u>    | CCDC91             | 0.6622                           | 0.000445       |
| <u>204559_s_at</u>  | LSM7               | 0.6623                           | 0.000807       |
| <u>223154_at</u>    | MRPL1              | 0.6627                           | 0.000426       |
| <u>206831_s_at</u>  | ARSD               | 0.6628                           | 0.000862       |
| <u>207761_s_at</u>  | METTL7A            | 0.6630                           | 0.000536       |
| <u>218575_at</u>    | ANAPC1             | 0.6631                           | 2.74E-05       |
| <u>223386_at</u>    | FAM118B            | 0.6633                           | 0.00079        |
| <u>218512_at</u>    | WDR12              | 0.6634                           | 0.000544       |
| <u>230434_at</u>    |                    | 0.6635                           | 0.000671       |
| <u>209363_s_at</u>  | MED21              | 0.6637                           | 8.20E-06       |
| <u>218146_at</u>    | GLT8D1             | 0.6643                           | 5.83E-05       |
| <u>227134_at</u>    | SYTL1              | 0.6646                           | 0.000962       |
| <u>1554029_a_at</u> | TTC37              | 0.6648                           | 0.00021        |
| <u>221622_s_at</u>  | TMEM126B           | 0.6649                           | 2.41E-05       |
| <u>201938_at</u>    | CDK2AP1            | 0.6649                           | 7.98E-05       |
| <u>228075_x_at</u>  | TFB1M              | 0.6652                           | 4.29E-05       |
| <u>229850_at</u>    | KDSR               | 0.6653                           | 0.000173       |
| <u>221891_x_at</u>  | HSPA8              | 0.6655                           | 9.88E-05       |
| <u>243452_at</u>    | LOC646778          | 0.6659                           | 0.000885       |
| <u>226628_at</u>    | THOC2              | 0.6660                           | 0.000367       |
| <u>205512_s_at</u>  | AIFM1              | 0.6661                           | 3.89E-05       |
| <u>224664_at</u>    | C10orf104          | 0.6661                           | 0.000963       |
| <u>212216_at</u>    | PREPL              | 0.6663                           | 0.000135       |
| <u>208722_s_at</u>  | ANAPC5             | 0.6663                           | 0.000558       |
| <u>218307_at</u>    | RSAD1              | 0.6664                           | 0.000985       |
| <u>206301_at</u>    | TEC                | 0.6671                           | 0.000334       |
| <u>226995_at</u>    | LOC642852          | 0.6673                           | 0.000751       |
| <u>201030_x_at</u>  | LDHB               | 0.6676                           | 0.000254       |
| <u>224129_s_at</u>  | DPY30              | 0.6678                           | 5.91E-05       |
| <u>205480_s_at</u>  | UGP2               | 0.6680                           | 0.000266       |
| <u>201624_at</u>    | DARS               | 0.6680                           | 0.00031        |
| <u>200845_s_at</u>  | PRDX6              | 0.6680                           | 8.49E-05       |
| <u>228189_at</u>    | BAG4               | 0.6680                           | 0.000149       |
| <u>219169_s_at</u>  | TFB1M              | 0.6690                           | 0.000103       |
| <u>219258_at</u>    | TIPIN              | 0.6691                           | 0.000655       |
| <u>215471_s_at</u>  | MAP7               | 0.6691                           | 0.000279       |
| <u>209233_at</u>    | EMG1               | 0.6697                           | 0.000273       |
| <u>220329_s_at</u>  | RMND1              | 0.6697                           | 0.000109       |
| <u>203177_x_at</u>  | TFAM               | 0.6698                           | 0.000131       |
| <u>226833_at</u>    | CYB5D1             | 0.6699                           | 1.89E-05       |

| <b>Probe set</b>    | <b>Gene Symbol</b> | <b>Fold-change:<br/>Low/High</b> | <b>P-value</b> |
|---------------------|--------------------|----------------------------------|----------------|
| <u>208832 at</u>    | ATXN10             | 0.6700                           | 0.00065        |
| <u>212221 x at</u>  | IDS                | 0.6700                           | 0.000619       |
| <u>217188 s at</u>  | C14orf1            | 0.6700                           | 2.32E-05       |
| <u>211684 s at</u>  | DYNC1I2            | 0.6705                           | 0.000104       |
| <u>210153 s at</u>  | ME2                | 0.6708                           | 0.000464       |
| <u>202641 at</u>    | ARL3               | 0.6709                           | 3.15E-05       |
| <u>200008 s at</u>  | GDI2               | 0.6710                           | 1.46E-05       |
| <u>200889 s at</u>  | SSR1               | 0.6718                           | 0.000939       |
| <u>210802 s at</u>  | DIMT1L             | 0.6718                           | 2.84E-05       |
| <u>220477 s at</u>  | C20orf30           | 0.6720                           | 0.000418       |
| <u>218440 at</u>    | MCCC1              | 0.6726                           | 0.000154       |
| <u>202213 s at</u>  | CUL4B              | 0.6727                           | 9.00E-07       |
| <u>1564238 a at</u> | WDR49              | 0.6728                           | 0.000735       |
| <u>203686 at</u>    | MPG                | 0.6728                           | 2.88E-05       |
| <u>219581 at</u>    | TSEN2              | 0.6729                           | 0.000178       |
| <u>218375 at</u>    | NUDT9              | 0.6730                           | 5.36E-05       |
| <u>221090 s at</u>  | OGFOD1             | 0.6732                           | 2.05E-05       |
| <u>204350 s at</u>  | MED7               | 0.6735                           | 0.000171       |
| <u>222805 at</u>    | MANEA              | 0.6738                           | 0.000226       |
| <u>219130 at</u>    | CCDC76             | 0.6740                           | 0.000328       |
| <u>229090 at</u>    | LOC220930          | 0.6740                           | 0.00085        |
| <u>212815 at</u>    | ASCC3              | 0.6741                           | 0.000141       |
| <u>202811 at</u>    | STAMBP             | 0.6742                           | 0.000569       |
| <u>211812 s at</u>  | B3GALNT1           | 0.6743                           | 0.000967       |
| <u>225881 at</u>    | SLC35B4            | 0.6744                           | 0.000663       |
| <u>222056 s at</u>  | FAHD2A             | 0.6745                           | 0.000695       |
| <u>65585 at</u>     | FAM86B1            | 0.6746                           | 0.000282       |
| <u>228091 at</u>    | STX17              | 0.6749                           | 0.000995       |
| <u>217777 s at</u>  | PTPLAD1            | 0.6750                           | 0.000718       |
| <u>221514 at</u>    | UTP14A             | 0.6751                           | 0.000366       |
| <u>1553218 a at</u> | ZNF512             | 0.6754                           | 0.000206       |
| <u>200708 at</u>    | GOT2               | 0.6754                           | 3.82E-05       |
| <u>1557984 s at</u> | RPAP3              | 0.6755                           | 1.62E-05       |
| <u>218005 at</u>    | ZNF22              | 0.6756                           | 0.000437       |
| <u>204386 s at</u>  | MRP63              | 0.6756                           | 0.000137       |
| <u>200978 at</u>    | MDH1               | 0.6758                           | 4.45E-05       |
| <u>226634 at</u>    | METTL10            | 0.6758                           | 0.000367       |
| <u>1554883 a at</u> | ERCC8              | 0.6760                           | 1.30E-06       |
| <u>1563111 a at</u> | PIGX               | 0.6762                           | 6.19E-05       |
| <u>230032 at</u>    | OSGEPL1            | 0.6765                           | 0.000309       |
| <u>212299 at</u>    | NEK9               | 0.6766                           | 0.000546       |
| <u>223286 at</u>    | C17orf81           | 0.6768                           | 0.000319       |
| <u>214214 s at</u>  | C1QBP              | 0.6769                           | 0.000195       |
| <u>218992 at</u>    | C9orf46            | 0.6771                           | 0.00015        |
| <u>223677 at</u>    | ATG10              | 0.6772                           | 0.000667       |
| <u>221449 s at</u>  | ITFG1              | 0.6772                           | 4.60E-06       |
| <u>218461 at</u>    | GPN3               | 0.6772                           | 1.76E-05       |
| <u>1558511 s at</u> | ESYT2              | 0.6777                           | 8.33E-05       |

| <b>Probe set</b>   | <b>Gene Symbol</b> | <b>Fold-change:<br/>Low/High</b> | <b>P-value</b> |
|--------------------|--------------------|----------------------------------|----------------|
| <u>221770 at</u>   | RPE                | 0.6780                           | 0.000127       |
| <u>224815 at</u>   | COMMD7             | 0.6783                           | 3.96E-05       |
| <u>202691 at</u>   | SNRPD1             | 0.6783                           | 0.000644       |
| <u>224665 at</u>   | C10orf104          | 0.6785                           | 0.000229       |
| <u>222683 at</u>   | RNF20              | 0.6785                           | 0.000153       |
| <u>225577 at</u>   |                    | 0.6785                           | 0.000418       |
| <u>204173 at</u>   | MYL6B              | 0.6786                           | 0.00083        |
| <u>210849 s at</u> | VPS41              | 0.6787                           | 0.00038        |
| <u>223221 at</u>   | SCO1               | 0.6788                           | 1.80E-06       |
| <u>225106 s at</u> | OGFOD1             | 0.6790                           | 4.58E-05       |
| <u>212640 at</u>   | PTPLB              | 0.6790                           | 0.000274       |
| <u>207088 s at</u> | SLC25A11           | 0.6795                           | 0.000943       |
| <u>1554774 at</u>  | MINA               | 0.6799                           | 0.000124       |
| <u>222654 at</u>   | IMPAD1             | 0.6799                           | 0.000919       |
| <u>203048 s at</u> | TTC37              | 0.6802                           | 9.50E-06       |
| <u>219972 s at</u> | C14orf135          | 0.6802                           | 0.000285       |
| <u>209463 s at</u> | TAF12              | 0.6802                           | 0.000122       |
| <u>202319 at</u>   | SENP6              | 0.6803                           | 0.000579       |
| <u>218734 at</u>   | NAT11              | 0.6805                           | 2.07E-05       |
| <u>222140 s at</u> |                    | 0.6809                           | 0.000133       |
| <u>212416 at</u>   | SCAMP1             | 0.6809                           | 5.34E-05       |
| <u>203007 x at</u> | LYPLA1             | 0.6810                           | 0.00021        |
| <u>218156 s at</u> | TSR1               | 0.6812                           | 1.20E-06       |
| <u>202214 s at</u> | CUL4B              | 0.6812                           | 4.64E-05       |
| <u>225101 s at</u> | SNX14              | 0.6812                           | 0.000941       |
| <u>242423 x at</u> |                    | 0.6812                           | 0.000976       |
| <u>225537 at</u>   | TRAPPC6B           | 0.6813                           | 0.000217       |
| <u>34764 at</u>    | LARS2              | 0.6814                           | 0.000175       |
| <u>235532 at</u>   | PIGM               | 0.6815                           | 0.000501       |
| <u>238039 at</u>   | LOC728769          | 0.6818                           | 0.000118       |
| <u>208721 s at</u> | ANAPC5             | 0.6819                           | 4.44E-05       |
| <u>236834 at</u>   | SCFD2              | 0.6820                           | 0.000503       |
| <u>218879 s at</u> | MTHFSD             | 0.6822                           | 0.000117       |
| <u>214173 x at</u> | C19orf2            | 0.6823                           | 0.000134       |
| <u>203415 at</u>   | PDCD6              | 0.6824                           | 0.000087       |
| <u>225359 at</u>   | DNAJC19            | 0.6827                           | 4.40E-06       |
| <u>223738 s at</u> | PGM2               | 0.6827                           | 2.34E-05       |
| <u>217919 s at</u> | MRPL42             | 0.6828                           | 4.84E-05       |
| <u>213564 x at</u> | LDHB               | 0.6833                           | 0.000124       |
| <u>223711 s at</u> | THYN1              | 0.6834                           | 0.000282       |
| <u>217968 at</u>   | TSSC1              | 0.6835                           | 0.00094        |
| <u>219366 at</u>   | AVEN               | 0.6835                           | 0.000518       |
| <u>226721 at</u>   | DPY19L4            | 0.6838                           | 0.000152       |
| <u>227741 at</u>   | PTPLB              | 0.6839                           | 3.69E-05       |
| <u>203077 s at</u> | SMAD2              | 0.6839                           | 0.000157       |
| <u>208852 s at</u> | CANX               | 0.6840                           | 0.000693       |
| <u>213463 s at</u> | FAM149B1           | 0.6840                           | 3.08E-05       |
| <u>201613 s at</u> | AP1G2              | 0.6845                           | 0.000644       |



| <b>Probe set</b>   | <b>Gene Symbol</b> | <b>Fold-change:<br/>Low/High</b> | <b>P-value</b> |
|--------------------|--------------------|----------------------------------|----------------|
| <u>224655 at</u>   | AK3                | 0.6847                           | 3.35E-05       |
| <u>210255 at</u>   | RAD51L1            | 0.6848                           | 1.77E-05       |
| <u>218395 at</u>   | ACTR6              | 0.6849                           | 0.000655       |
| <u>221759 at</u>   | G6PC3              | 0.6849                           | 0.000311       |
| <u>200992 at</u>   | IPO7               | 0.6850                           | 0.00014        |
| <u>226529 at</u>   | TMEM106B           | 0.6850                           | 0.000978       |
| <u>208860 s at</u> | ATRX               | 0.6852                           | 0.000742       |
| <u>218549 s at</u> | FAM82B             | 0.6854                           | 0.000509       |
| <u>207358 x at</u> | MACF1              | 0.6855                           | 0.000211       |
| <u>238631 at</u>   | ZNF140             | 0.6858                           | 0.000143       |
| <u>201512 s at</u> | TOMM70A            | 0.6859                           | 0.000017       |
| <u>235189 at</u>   | NARG2              | 0.6860                           | 3.67E-05       |
| <u>209497 s at</u> | RBM4B              | 0.6860                           | 8.26E-05       |
| <u>222451 s at</u> | ZDHHC9             | 0.6860                           | 0.000136       |
| <u>203405 at</u>   | PSMG1              | 0.6862                           | 9.27E-05       |
| <u>209449 at</u>   | LSM2               | 0.6862                           | 0.000181       |
| <u>223231 at</u>   | TATDN1             | 0.6863                           | 0.000217       |
| <u>203714 s at</u> | TBCE               | 0.6867                           | 1.73E-05       |
| <u>203226 s at</u> | TSPAN31            | 0.6868                           | 9.30E-06       |
| <u>202783 at</u>   | NNT                | 0.6868                           | 0.000118       |
| <u>211337 s at</u> | TUBGCP4            | 0.6870                           | 2.96E-05       |
| <u>227674 at</u>   | ZNF585A            | 0.6875                           | 4.70E-06       |
| <u>238565 at</u>   |                    | 0.6876                           | 0.000166       |
| <u>239240 at</u>   |                    | 0.6876                           | 9.32E-05       |
| <u>212352 s at</u> | TMED10             | 0.6876                           | 0.000196       |
| <u>218654 s at</u> | MRPS33             | 0.6878                           | 0.000066       |
| <u>225297 at</u>   | HAUS1              | 0.6882                           | 0.000101       |
| <u>220642 x at</u> |                    | 0.6882                           | 1.40E-06       |
| <u>203245 s at</u> | NCRNA00094         | 0.6882                           | 0.000182       |
| <u>217301 x at</u> | RBBP4              | 0.6883                           | 9.55E-05       |
| <u>213540 at</u>   | HSD17B8            | 0.6885                           | 0.000127       |
| <u>202784 s at</u> | NNT                | 0.6889                           | 0.000385       |
| <u>224151 s at</u> | AK3                | 0.6889                           | 0.000457       |
| <u>222590 s at</u> | NLK                | 0.6889                           | 0.000282       |
| <u>235387 at</u>   | GSTCD              | 0.6892                           | 8.99E-05       |
| <u>225419 at</u>   | C7orf11            | 0.6892                           | 6.17E-05       |
| <u>210621 s at</u> | RASA1              | 0.6893                           | 0.000381       |
| <u>203633 at</u>   | CPT1A              | 0.6893                           | 0.000046       |
| <u>212259 s at</u> | PBXIP1             | 0.6894                           | 0.000217       |
| <u>221575 at</u>   | SCLY               | 0.6895                           | 0.000561       |
| <u>221620 s at</u> | APOO               | 0.6896                           | 0.0003         |
| <u>231921 at</u>   | DCAF17             | 0.6897                           | 9.09E-05       |
| <u>225400 at</u>   | TSEN15             | 0.6897                           | 2.17E-05       |
| <u>224834 at</u>   | UBTD2              | 0.6898                           | 0.00047        |
| <u>224929 at</u>   | TMEM173            | 0.6902                           | 0.000238       |
| <u>44654 at</u>    | G6PC3              | 0.6902                           | 0.000552       |
| <u>235443 at</u>   | LOC100131067       | 0.6903                           | 0.000808       |
| <u>212605 s at</u> |                    | 0.6906                           | 0.000419       |

| <b>Probe set</b>    | <b>Gene Symbol</b> | <b>Fold-change:<br/>Low/High</b> | <b>P-value</b> |
|---------------------|--------------------|----------------------------------|----------------|
| <u>219023 at</u>    | C4orf16            | 0.6906                           | 5.95E-05       |
| <u>228239 at</u>    | FAM165B            | 0.6907                           | 0.000406       |
| <u>217942 at</u>    | MRPS35             | 0.6910                           | 0.000177       |
| <u>211150 s at</u>  | DLAT               | 0.6912                           | 0.000017       |
| <u>225734 at</u>    | FBXO22             | 0.6914                           | 8.28E-05       |
| <u>221513 s at</u>  |                    | 0.6916                           | 0.000119       |
| <u>208654 s at</u>  | CD164              | 0.6919                           | 6.24E-05       |
| <u>218628 at</u>    | CCDC53             | 0.6920                           | 0.00099        |
| <u>203630 s at</u>  | COG5               | 0.6922                           | 0.000263       |
| <u>217725 x at</u>  | SERBP1             | 0.6923                           | 0.000348       |
| <u>213047 x at</u>  | SET                | 0.6925                           | 3.27E-05       |
| <u>1555846 a at</u> |                    | 0.6927                           | 0.000706       |
| <u>211626 x at</u>  | ERG                | 0.6927                           | 8.95E-05       |
| <u>231896 s at</u>  | DENR               | 0.6928                           | 3.29E-05       |
| <u>200972 at</u>    | TSPAN3             | 0.6932                           | 0.000564       |
| <u>218584 at</u>    | TCTN1              | 0.6936                           | 0.000123       |
| <u>202457 s at</u>  | PPP3CA             | 0.6936                           | 0.00024        |
| <u>209362 at</u>    | MED21              | 0.6937                           | 0.000438       |
| <u>237158 s at</u>  | MPHOSPH9           | 0.6939                           | 2.81E-05       |
| <u>213625 at</u>    | ZKSCAN4            | 0.6939                           | 0.000838       |
| <u>226780 s at</u>  |                    | 0.6940                           | 0.000605       |
| <u>225670 at</u>    | FAM173B            | 0.6940                           | 0.00097        |
| <u>211075 s at</u>  | CD47               | 0.6941                           | 0.000465       |
| <u>217795 s at</u>  | TMEM43             | 0.6941                           | 9.70E-06       |
| <u>213312 at</u>    | C6orf162           | 0.6943                           | 0.000334       |
| <u>212957 s at</u>  | LOC92249           | 0.6947                           | 8.41E-05       |
| <u>225399 at</u>    | TSEN15             | 0.6947                           | 1.06E-05       |
| <u>238615 at</u>    | ERLIN2             | 0.6949                           | 0.000239       |
| <u>220007 at</u>    | METTL8             | 0.6949                           | 1.49E-05       |
| <u>204925 at</u>    | CTNS               | 0.6949                           | 0.00023        |
| <u>238662 at</u>    | ATPBD4             | 0.6951                           | 0.000211       |
| <u>238418 at</u>    | SLC35B4            | 0.6952                           | 0.000866       |
| <u>228671 at</u>    | TMEM201            | 0.6956                           | 3.25E-05       |
| <u>208633 s at</u>  | MACF1              | 0.6956                           | 0.000245       |
| <u>223506 at</u>    | ZC3H8              | 0.6957                           | 0.000078       |
| <u>225325 at</u>    | MFSD6              | 0.6959                           | 0.000342       |
| <u>208669 s at</u>  | EID1               | 0.6962                           | 2.80E-06       |
| <u>223018 at</u>    | NOB1               | 0.6963                           | 0.000109       |
| <u>201433 s at</u>  | PTDSS1             | 0.6963                           | 0.00025        |
| <u>225546 at</u>    | EEF2K              | 0.6963                           | 0.000132       |
| <u>225113 at</u>    | AGPS               | 0.6964                           | 0.000273       |
| <u>1561737 at</u>   |                    | 0.6965                           | 0.000346       |
| <u>214323 s at</u>  | UPF3A              | 0.6966                           | 0.000349       |
| <u>235005 at</u>    | DIS3L              | 0.6968                           | 4.52E-05       |
| <u>201562 s at</u>  | SORD               | 0.6971                           | 0.00038        |
| <u>221691 x at</u>  | NPM1               | 0.6971                           | 0.000187       |
| <u>225002 s at</u>  | SUMF2              | 0.6973                           | 0.000144       |
| <u>214894 x at</u>  | MACF1              | 0.6974                           | 0.000196       |

| <b>Probe set</b>    | <b>Gene Symbol</b> | <b>Fold-change:<br/>Low/High</b> | <b>P-value</b> |
|---------------------|--------------------|----------------------------------|----------------|
| <u>225600 at</u>    | C8orf83            | 0.6974                           | 0.000306       |
| <u>205135 s at</u>  | NUFIP1             | 0.6974                           | 0.000624       |
| <u>228763 at</u>    | MDP1               | 0.6976                           | 0.000967       |
| <u>210027 s at</u>  | APEX1              | 0.6976                           | 0.000595       |
| <u>226151 x at</u>  | CRYZL1             | 0.6976                           | 0.000368       |
| <u>221781 s at</u>  | DNAJC10            | 0.6977                           | 0.00027        |
| <u>1556285 s at</u> | PPA2               | 0.6978                           | 0.000561       |
| <u>222849 s at</u>  | SCRN3              | 0.6978                           | 0.000906       |
| <u>223001 at</u>    | OSTC               | 0.6979                           | 0.000121       |
| <u>205704 s at</u>  | ATP6V0A2           | 0.6980                           | 0.000339       |
| <u>212223 at</u>    | IDS                | 0.6981                           | 0.000408       |
| <u>203075 at</u>    | SMAD2              | 0.6982                           | 0.000988       |
| <u>224740 at</u>    | C5orf43            | 0.6983                           | 0.000483       |
| <u>236042 at</u>    | LOC100130219       | 0.6983                           | 4.46E-05       |
| <u>226314 at</u>    | CHST14             | 0.6984                           | 0.000281       |
| <u>202845 s at</u>  | RALBP1             | 0.6984                           | 5.45E-05       |
| <u>219538 at</u>    | WDR5B              | 0.6984                           | 0.000616       |
| <u>220206 at</u>    | ZMYM1              | 0.6988                           | 0.000652       |
| <u>218757 s at</u>  | UPF3B              | 0.6993                           | 0.000505       |
| <u>233252 s at</u>  | STRBP              | 0.6995                           | 0.000465       |
| <u>202854 at</u>    | HPRT1              | 0.6995                           | 4.17E-05       |
| <u>218046 s at</u>  | MRPS16             | 0.6996                           | 2.45E-05       |
| <u>221082 s at</u>  | NDRG3              | 0.6996                           | 0.000824       |
| <u>213896 x at</u>  | FAM149B1           | 0.6996                           | 0.000344       |
| <u>204353 s at</u>  | POT1               | 0.6996                           | 0.000101       |
| <u>238684 at</u>    |                    | 0.6997                           | 0.000206       |
| <u>218288 s at</u>  | CCDC90B            | 0.6998                           | 0.000038       |
| <u>214045 at</u>    | LIAS               | 0.7000                           | 0.000357       |
| <u>202012 s at</u>  | EXT2               | 0.7001                           | 0.000175       |
| <u>229741 at</u>    | MAVS               | 0.7003                           | 0.000518       |
| <u>226127 at</u>    | ALKBH3             | 0.7004                           | 0.000226       |
| <u>208847 s at</u>  | ADH5               | 0.7004                           | 3.70E-06       |
| <u>235338 s at</u>  | SETDB2             | 0.7004                           | 0.000369       |
| <u>215099 s at</u>  | RXRB               | 0.7005                           | 0.000141       |
| <u>225220 at</u>    | SNHG8              | 0.7005                           | 0.000927       |
| <u>237105 at</u>    |                    | 0.7007                           | 0.000864       |
| <u>216944 s at</u>  | ITPR1              | 0.7007                           | 0.00026        |
| <u>200064 at</u>    | HSP90AB1           | 0.7012                           | 0.000149       |
| <u>204085 s at</u>  | CLN5               | 0.7012                           | 0.000708       |
| <u>218124 at</u>    | RETSAT             | 0.7014                           | 8.36E-05       |
| <u>202754 at</u>    | R3HDM1             | 0.7014                           | 1.08E-05       |
| <u>226583 at</u>    | C12orf76           | 0.7015                           | 0.000288       |
| <u>201260 s at</u>  | SYPL1              | 0.7015                           | 0.000116       |
| <u>218689 at</u>    | FANCF              | 0.7016                           | 0.000377       |
| <u>215222 x at</u>  | MACF1              | 0.7017                           | 0.000227       |
| <u>218439 s at</u>  | COMMD10            | 0.7018                           | 9.37E-05       |
| <u>203293 s at</u>  | LMAN1              | 0.7018                           | 0.00062        |
| <u>236032 at</u>    |                    | 0.7018                           | 0.000293       |

| <b>Probe set</b>   | <b>Gene Symbol</b> | <b>Fold-change:<br/>Low/High</b> | <b>P-value</b> |
|--------------------|--------------------|----------------------------------|----------------|
| <u>203577 at</u>   | GTF2H4             | 0.7018                           | 0.000473       |
| <u>202501 at</u>   | MAPRE2             | 0.7019                           | 8.53E-05       |
| <u>201491 at</u>   | AHSA1              | 0.7024                           | 0.000446       |
| <u>203032 s at</u> | FH                 | 0.7025                           | 7.95E-05       |
| <u>241926 s at</u> | ERG                | 0.7030                           | 0.000679       |
| <u>36554 at</u>    | ASMTL              | 0.7031                           | 0.000136       |
| <u>218349 s at</u> | ZWILCH             | 0.7033                           | 0.000663       |
| <u>219242 at</u>   | CEP63              | 0.7038                           | 0.000911       |
| <u>217921 at</u>   | MAN1A2             | 0.7039                           | 0.000103       |
| <u>205588 s at</u> | FGFR1OP            | 0.7040                           | 0.000561       |
| <u>224584 at</u>   | C20orf30           | 0.7040                           | 0.000264       |
| <u>224946 s at</u> | CCDC115            | 0.7040                           | 4.90E-06       |
| <u>229606 at</u>   |                    | 0.7041                           | 0.000684       |
| <u>203257 s at</u> | C11orf49           | 0.7041                           | 0.000222       |
| <u>213042 s at</u> | ATP2A3             | 0.7042                           | 0.000599       |
| <u>234726 s at</u> | TMEM168            | 0.7043                           | 0.000286       |
| <u>219974 x at</u> | ECHDC1             | 0.7043                           | 0.000373       |
| <u>208802 at</u>   | SRP72              | 0.7044                           | 0.000616       |
| <u>219003 s at</u> | MANEA              | 0.7045                           | 4.15E-05       |
| <u>203294 s at</u> | LMAN1              | 0.7046                           | 0.000774       |
| <u>229243 at</u>   |                    | 0.7048                           | 0.00063        |
| <u>202049 s at</u> | ZMYM4              | 0.7049                           | 0.000814       |
| <u>225412 at</u>   | TMEM87B            | 0.7054                           | 0.000459       |
| <u>238056 at</u>   | SDHC               | 0.7057                           | 1.78E-05       |
| <u>201332 s at</u> | STAT6              | 0.7057                           | 0.000965       |
| <u>225014 at</u>   | LOC389203          | 0.7059                           | 0.000619       |
| <u>218377 s at</u> | RWDD2B             | 0.7061                           | 0.000147       |
| <u>221688 s at</u> | IMP3               | 0.7062                           | 9.36E-05       |
| <u>223671 x at</u> | DPH5               | 0.7063                           | 0.000221       |
| <u>219060 at</u>   | WDYHV1             | 0.7064                           | 0.000523       |
| <u>224971 at</u>   | MRPL30             | 0.7067                           | 0.000149       |
| <u>221550 at</u>   | COX15              | 0.7068                           | 0.000641       |
| <u>204957 at</u>   | ORC5L              | 0.7073                           | 0.000865       |
| <u>222609 s at</u> | EXOSC1             | 0.7074                           | 4.56E-05       |
| <u>208787 at</u>   | MRPL3              | 0.7076                           | 0.000366       |
| <u>205540 s at</u> | RRAGB              | 0.7077                           | 0.000273       |
| <u>211934 x at</u> | GANAB              | 0.7082                           | 0.000447       |
| <u>218946 at</u>   | NFU1               | 0.7086                           | 7.39E-05       |
| <u>203960 s at</u> | HSPB11             | 0.7086                           | 0.000152       |
| <u>225574 at</u>   | RWDD4A             | 0.7088                           | 0.000198       |
| <u>219080 s at</u> | CTPS2              | 0.7089                           | 0.000306       |
| <u>208861 s at</u> | ATRX               | 0.7094                           | 0.000473       |
| <u>225358 at</u>   | DNAJC19            | 0.7099                           | 0.000126       |
| <u>225676 s at</u> | DCAF13             | 0.7100                           | 0.000213       |
| <u>206668 s at</u> | SCAMP1             | 0.7100                           | 2.06E-05       |
| <u>227916 x at</u> | EXOSC3             | 0.7103                           | 0.000738       |
| <u>234915 s at</u> | DENR               | 0.7103                           | 4.63E-05       |
| <u>229018 at</u>   | C12orf26           | 0.7104                           | 0.000381       |

| <b>Probe set</b>    | <b>Gene Symbol</b> | <b>Fold-change:<br/>Low/High</b> | <b>P-value</b> |
|---------------------|--------------------|----------------------------------|----------------|
| <u>204186 s at</u>  | PPID               | 0.7105                           | 0.000323       |
| <u>1554078 s at</u> | DNAJA3             | 0.7106                           | 0.000842       |
| <u>220260 at</u>    | TBC1D19            | 0.7108                           | 2.36E-05       |
| <u>222697 s at</u>  | ABHD10             | 0.7110                           | 0.000109       |
| <u>203941 at</u>    | INTS9              | 0.7115                           | 7.50E-06       |
| <u>223847 s at</u>  | ERGIC1             | 0.7115                           | 0.000228       |
| <u>203340 s at</u>  | SLC25A12           | 0.7116                           | 9.86E-05       |
| <u>218715 at</u>    | UTP6               | 0.7118                           | 0.000108       |
| <u>225599 s at</u>  | C8orf83            | 0.7121                           | 0.000507       |
| <u>222511 x at</u>  | FAF1               | 0.7122                           | 0.000742       |
| <u>211114 x at</u>  | SIP1               | 0.7122                           | 4.47E-05       |
| <u>212038 s at</u>  | VDAC1              | 0.7122                           | 0.000589       |
| <u>215535 s at</u>  | AGPAT1             | 0.7123                           | 0.0008         |
| <u>225712 at</u>    | GEMIN5             | 0.7124                           | 0.000294       |
| <u>218989 x at</u>  | SLC30A5            | 0.7124                           | 0.00047        |
| <u>231727 s at</u>  | MIF4GD             | 0.7126                           | 0.000983       |
| <u>1559681 a at</u> | TRIM16L            | 0.7127                           | 0.000381       |
| <u>1568678 s at</u> | FGFR1OP            | 0.7129                           | 0.000618       |
| <u>216064 s at</u>  | AGA                | 0.7129                           | 0.00047        |
| <u>203947 at</u>    | CSTF3              | 0.7129                           | 0.000661       |
| <u>229602 at</u>    |                    | 0.7133                           | 0.00025        |
| <u>219658 at</u>    | PTCD2              | 0.7135                           | 0.000213       |
| <u>222672 at</u>    | LYRM4              | 0.7136                           | 0.000228       |
| <u>229360 at</u>    | ZNF280B            | 0.7138                           | 0.000896       |
| <u>213149 at</u>    | DLAT               | 0.7139                           | 0.000513       |
| <u>223401 at</u>    | C17orf48           | 0.7140                           | 0.000363       |
| <u>226642 s at</u>  | NUDCD2             | 0.7142                           | 0.000192       |
| <u>201268 at</u>    |                    | 0.7144                           | 0.000933       |
| <u>219858 s at</u>  | MFSD6              | 0.7147                           | 0.000753       |
| <u>205162 at</u>    |                    | 0.7148                           | 6.20E-06       |
| <u>219539 at</u>    | GEMIN6             | 0.7149                           | 0.000716       |
| <u>202261 at</u>    | VPS72              | 0.7149                           | 0.000847       |
| <u>201653 at</u>    | CNIH               | 0.7150                           | 6.35E-05       |
| <u>36566 at</u>     | CTNS               | 0.7151                           | 0.000602       |
| <u>223156 at</u>    | MRPS23             | 0.7153                           | 0.00048        |
| <u>222659 at</u>    | IPO11              | 0.7154                           | 0.000202       |
| <u>243444 at</u>    |                    | 0.7155                           | 0.000848       |
| <u>203678 at</u>    | MTMR15             | 0.7156                           | 0.000837       |
| <u>1555803 a at</u> | C11orf57           | 0.7159                           | 0.000363       |
| <u>210691 s at</u>  | CACYBP             | 0.7161                           | 0.000792       |
| <u>208858 s at</u>  | ESYT1              | 0.7162                           | 0.000569       |
| <u>208055 s at</u>  | HERC4              | 0.7162                           | 0.000236       |
| <u>224200 s at</u>  | RAD18              | 0.7163                           | 2.26E-05       |
| <u>235647 at</u>    | AP4S1              | 0.7164                           | 0.000149       |
| <u>216960 s at</u>  | ZNF133             | 0.7165                           | 0.000804       |
| <u>209494 s at</u>  | PATZ1              | 0.7168                           | 1.43E-05       |
| <u>1554145 a at</u> | KLRAQ1             | 0.7168                           | 1.96E-05       |
| <u>203611 at</u>    | TERF2              | 0.7170                           | 0.00011        |

| <b>Probe set</b>   | <b>Gene Symbol</b> | <b>Fold-change:<br/>Low/High</b> | <b>P-value</b> |
|--------------------|--------------------|----------------------------------|----------------|
| <u>214507 s at</u> | EXOSC2             | 0.7173                           | 0.000233       |
| <u>218882 s at</u> | WDR3               | 0.7173                           | 0.000864       |
| <u>229803 s at</u> |                    | 0.7175                           | 0.000709       |
| <u>223193 x at</u> | FAM162A            | 0.7176                           | 0.000573       |
| <u>209751 s at</u> |                    | 0.7185                           | 0.000248       |
| <u>210278 s at</u> | AP4S1              | 0.7189                           | 8.23E-05       |
| <u>201873 s at</u> | ABCE1              | 0.7190                           | 0.000445       |
| <u>221471 at</u>   | SERINC3            | 0.7191                           | 0.000069       |
| <u>224196 x at</u> | DPH5               | 0.7191                           | 0.000646       |
| <u>209426 s at</u> |                    | 0.7192                           | 8.60E-06       |
| <u>242618 at</u>   |                    | 0.7193                           | 1.12E-05       |
| <u>227650 at</u>   | HSPA14             | 0.7193                           | 0.000369       |
| <u>231840 x at</u> | LYRM7              | 0.7193                           | 0.000461       |
| <u>218363 at</u>   | EXD2               | 0.7194                           | 0.000645       |
| <u>239715 at</u>   |                    | 0.7194                           | 0.000534       |
| <u>229525 at</u>   | THOC7              | 0.7195                           | 6.79E-05       |
| <u>238794 at</u>   | C10orf78           | 0.7196                           | 0.00016        |
| <u>210892 s at</u> | GTF2I              | 0.7198                           | 0.000381       |
| <u>1552562 at</u>  | ZNF570             | 0.7198                           | 0.000184       |
| <u>219933 at</u>   | GLRX2              | 0.7201                           | 3.54E-05       |
| <u>207838 x at</u> | PBXIP1             | 0.7204                           | 0.000505       |
| <u>212424 at</u>   | PDCD11             | 0.7206                           | 0.000229       |
| <u>224698 at</u>   | ESYT2              | 0.7207                           | 0.000186       |
| <u>207621 s at</u> | PEMT               | 0.7208                           | 0.000822       |
| <u>233341 s at</u> | POLR1B             | 0.7209                           | 5.26E-05       |
| <u>230718 at</u>   | HSF5               | 0.7210                           | 0.000706       |
| <u>207507 s at</u> | ATP5G3             | 0.7211                           | 1.12E-05       |
| <u>202137 s at</u> | ZMYND11            | 0.7211                           | 6.48E-05       |
| <u>208643 s at</u> | XRCC5              | 0.7213                           | 4.80E-06       |
| <u>225545 at</u>   | EEF2K              | 0.7213                           | 0.000203       |
| <u>228162 at</u>   | ESD                | 0.7214                           | 0.00055        |
| <u>225463 x at</u> | GPR89A             | 0.7216                           | 5.79E-05       |
| <u>219960 s at</u> | UCHL5              | 0.7217                           | 0.000028       |
| <u>217099 s at</u> | GEMIN4             | 0.7219                           | 7.20E-06       |
| <u>235177 at</u>   | FAM119A            | 0.7220                           | 0.000902       |
| <u>222610 s at</u> | S100PBP            | 0.7222                           | 0.000949       |
| <u>218229 s at</u> | POGK               | 0.7222                           | 0.000476       |
| <u>211023 at</u>   | PDHB               | 0.7222                           | 0.000188       |
| <u>235124 at</u>   | LOC645212          | 0.7223                           | 2.66E-05       |
| <u>201076 at</u>   | NHP2L1             | 0.7224                           | 0.000118       |
| <u>200916 at</u>   | TAGLN2             | 0.7225                           | 9.72E-05       |
| <u>238448 at</u>   | MRPL19             | 0.7227                           | 0.000207       |
| <u>214136 at</u>   | NUDT13             | 0.7228                           | 6.60E-06       |
| <u>217185 s at</u> |                    | 0.7234                           | 0.00028        |
| <u>218816 at</u>   | LRRC1              | 0.7235                           | 0.000901       |
| <u>224700 at</u>   | STT3B              | 0.7236                           | 5.16E-05       |
| <u>235830 at</u>   |                    | 0.7236                           | 0.000901       |
| <u>217907 at</u>   | MRPL18             | 0.7237                           | 0.000193       |

| <b>Probe set</b>    | <b>Gene Symbol</b> | <b>Fold-change:<br/>Low/High</b> | <b>P-value</b> |
|---------------------|--------------------|----------------------------------|----------------|
| <u>218593 at</u>    | RBM28              | 0.7237                           | 0.000206       |
| <u>202470 s at</u>  | CPSF6              | 0.7240                           | 0.000537       |
| <u>204905 s at</u>  | EEF1E1             | 0.7244                           | 0.000199       |
| <u>223531 x at</u>  |                    | 0.7244                           | 0.000156       |
| <u>226262 at</u>    |                    | 0.7244                           | 0.000879       |
| <u>219767 s at</u>  | CRYZL1             | 0.7245                           | 0.000614       |
| <u>212872 s at</u>  | MED20              | 0.7246                           | 0.000592       |
| <u>209825 s at</u>  | UCK2               | 0.7248                           | 0.000713       |
| <u>200987 x at</u>  | PSME3              | 0.7249                           | 0.000239       |
| <u>218932 at</u>    | ZNHIT6             | 0.7252                           | 0.000409       |
| <u>205408 at</u>    | MLLT10             | 0.7254                           | 0.000162       |
| <u>227865 at</u>    | C9orf103           | 0.7260                           | 0.000371       |
| <u>219733 s at</u>  | SLC27A5            | 0.7260                           | 0.000204       |
| <u>202891 at</u>    | NIT1               | 0.7262                           | 0.000056       |
| <u>215667 x at</u>  | PMS2L1             | 0.7263                           | 0.000259       |
| <u>223066 at</u>    | SNAPIN             | 0.7266                           | 0.000907       |
| <u>218988 at</u>    | SLC35E3            | 0.7267                           | 1.73E-05       |
| <u>216308 x at</u>  | GRHPR              | 0.7267                           | 0.000313       |
| <u>218526 s at</u>  | RANGRF             | 0.7268                           | 0.000116       |
| <u>201977 s at</u>  | KIAA0141           | 0.7272                           | 0.000232       |
| <u>206205 at</u>    | MPHOSPH9           | 0.7274                           | 5.54E-05       |
| <u>218289 s at</u>  | UBA5               | 0.7274                           | 0.000109       |
| <u>208906 at</u>    | BSCL2              | 0.7275                           | 0.000749       |
| <u>1556178 x at</u> | TAF8               | 0.7275                           | 1.84E-05       |
| <u>209741 x at</u>  | SCAPER             | 0.7277                           | 0.000954       |
| <u>225398 at</u>    | RPUSD4             | 0.7278                           | 0.000262       |
| <u>203179 at</u>    | GALT               | 0.7280                           | 0.000476       |
| <u>200946 x at</u>  | GLUD1              | 0.7282                           | 0.000222       |
| <u>201381 x at</u>  | CACYBP             | 0.7287                           | 0.000445       |
| <u>230329 s at</u>  | NUDT6              | 0.7288                           | 0.000145       |
| <u>238511 at</u>    |                    | 0.7290                           | 0.000055       |
| <u>202601 s at</u>  | HTATSF1            | 0.7290                           | 5.73E-05       |
| <u>212954 at</u>    | DYRK4              | 0.7291                           | 0.000494       |
| <u>203264 s at</u>  | ARHGEF9            | 0.7292                           | 0.000447       |
| <u>205711 x at</u>  | ATP5C1             | 0.7295                           | 5.60E-06       |
| <u>213610 s at</u>  | KLHL23             | 0.7296                           | 0.000295       |
| <u>224602 at</u>    | C4orf3             | 0.7297                           | 0.00016        |
| <u>223996 s at</u>  | MRPL30             | 0.7301                           | 2.77E-05       |
| <u>212996 s at</u>  | URB1               | 0.7303                           | 0.000306       |
| <u>241734 at</u>    | SRFBP1             | 0.7303                           | 0.00017        |
| <u>224467 s at</u>  | PDCD2L             | 0.7306                           | 0.000783       |
| <u>214942 at</u>    | RBM34              | 0.7307                           | 0.000574       |
| <u>203197 s at</u>  | C1orf123           | 0.7309                           | 0.000558       |
| <u>213893 x at</u>  |                    | 0.7310                           | 0.000143       |
| <u>225736 at</u>    | FBXO22             | 0.7312                           | 0.000306       |
| <u>218838 s at</u>  | TTC31              | 0.7312                           | 0.000105       |
| <u>220397 at</u>    | MDM1               | 0.7313                           | 0.000195       |
| <u>1566303 s at</u> | PPP1R11            | 0.7313                           | 0.000433       |

| <b>Probe set</b>    | <b>Gene Symbol</b> | <b>Fold-change:<br/>Low/High</b> | <b>P-value</b> |
|---------------------|--------------------|----------------------------------|----------------|
| <u>224495 at</u>    | TMEM107            | 0.7316                           | 0.000835       |
| <u>222741 s at</u>  | C6orf64            | 0.7320                           | 0.000974       |
| <u>212123 at</u>    | TCTN3              | 0.7322                           | 0.00013        |
| <u>32836 at</u>     | AGPAT1             | 0.7324                           | 0.000997       |
| <u>207011 s at</u>  | PTK7               | 0.7327                           | 0.000624       |
| <u>217106 x at</u>  | DIMT1L             | 0.7328                           | 0.000363       |
| <u>208405 s at</u>  | CD164              | 0.7328                           | 0.000333       |
| <u>202179 at</u>    | BLMH               | 0.7329                           | 0.000264       |
| <u>210779 x at</u>  | SIP1               | 0.7330                           | 4.09E-05       |
| <u>227442 at</u>    | COX18              | 0.7331                           | 5.81E-05       |
| <u>201468 s at</u>  | NQO1               | 0.7334                           | 8.74E-05       |
| <u>218398 at</u>    | MRPS30             | 0.7337                           | 0.000029       |
| <u>214708 at</u>    | SNTB1              | 0.7339                           | 0.000442       |
| <u>1555831 s at</u> | LRRC41             | 0.7340                           | 0.000817       |
| <u>226835 s at</u>  | C20orf199          | 0.7340                           | 0.000781       |
| <u>227637 at</u>    | TFCP2              | 0.7341                           | 0.000704       |
| <u>235736 at</u>    |                    | 0.7341                           | 0.000176       |
| <u>203277 at</u>    | DFFA               | 0.7343                           | 0.000218       |
| <u>224913 s at</u>  | TIMM50             | 0.7346                           | 0.000396       |
| <u>218285 s at</u>  | BDH2               | 0.7346                           | 0.000644       |
| <u>224863 at</u>    | GNAQ               | 0.7348                           | 0.000364       |
| <u>240106 at</u>    | GNPTAB             | 0.7348                           | 3.11E-05       |
| <u>220183 s at</u>  | NUDT6              | 0.7349                           | 0.000446       |
| <u>210131 x at</u>  | SDHC               | 0.7350                           | 0.000439       |
| <u>211115 x at</u>  | SIP1               | 0.7352                           | 0.000074       |
| <u>208870 x at</u>  | ATP5C1             | 0.7354                           | 7.50E-06       |
| <u>223056 s at</u>  | XPO5               | 0.7355                           | 0.000108       |
| <u>216652 s at</u>  | DR1                | 0.7355                           | 0.000249       |
| <u>203613 s at</u>  | NDUFB6             | 0.7357                           | 0.000576       |
| <u>208897 s at</u>  | DDX18              | 0.7357                           | 1.25E-05       |
| <u>200631 s at</u>  | SET                | 0.7358                           | 0.000199       |
| <u>241379 at</u>    | APLF               | 0.7359                           | 0.000913       |
| <u>223157 at</u>    | C4orf14            | 0.7361                           | 0.000135       |
| <u>225623 at</u>    |                    | 0.7362                           | 0.000619       |
| <u>227374 at</u>    | EARS2              | 0.7362                           | 0.000471       |
| <u>201051 at</u>    | ANP32A             | 0.7367                           | 0.00084        |
| <u>203867 s at</u>  | NLE1               | 0.7369                           | 0.000796       |
| <u>227409 at</u>    | PPP1R3E            | 0.7370                           | 0.000443       |
| <u>218748 s at</u>  | EXOC5              | 0.7371                           | 0.000346       |
| <u>231918 s at</u>  | GFM2               | 0.7374                           | 0.000186       |
| <u>215708 s at</u>  | PRIM2              | 0.7374                           | 4.96E-05       |
| <u>202050 s at</u>  | ZMYM4              | 0.7375                           | 0.000232       |
| <u>51146 at</u>     | PIGV               | 0.7376                           | 0.000943       |
| <u>208675 s at</u>  | DDOST              | 0.7380                           | 0.000824       |
| <u>219004 s at</u>  | C21orf45           | 0.7384                           | 0.000831       |
| <u>232675 s at</u>  | UCKL1              | 0.7385                           | 0.000582       |
| <u>229425 at</u>    |                    | 0.7392                           | 0.000063       |
| <u>243007 at</u>    |                    | 0.7392                           | 0.00019        |



| <b>Probe set</b>    | <b>Gene Symbol</b> | <b>Fold-change:<br/>Low/High</b> | <b>P-value</b> |
|---------------------|--------------------|----------------------------------|----------------|
| <u>204405_x_at</u>  | DIMT1L             | 0.7392                           | 0.000704       |
| <u>203905_at</u>    | PARN               | 0.7393                           | 0.000359       |
| <u>216194_s_at</u>  | TBCB               | 0.7394                           | 0.000627       |
| <u>200947_s_at</u>  | GLUD1              | 0.7395                           | 0.000467       |
| <u>218527_at</u>    | APTX               | 0.7397                           | 0.000636       |
| <u>211976_at</u>    |                    | 0.7398                           | 0.000645       |
| <u>201657_at</u>    | ARL1               | 0.7398                           | 0.000822       |
| <u>210337_s_at</u>  | ACLY               | 0.7401                           | 0.000997       |
| <u>243790_at</u>    | ZNF585A            | 0.7401                           | 6.37E-05       |
| <u>205702_at</u>    | PHTF1              | 0.7403                           | 6.07E-05       |
| <u>214934_at</u>    | ATP9B              | 0.7408                           | 0.000767       |
| <u>1563646_a_at</u> | TMEM67             | 0.7410                           | 0.000882       |
| <u>201515_s_at</u>  | TSN                | 0.7411                           | 4.48E-05       |
| <u>235191_at</u>    | LOC148189          | 0.7412                           | 0.000794       |
| <u>203076_s_at</u>  | SMAD2              | 0.7412                           | 0.000137       |
| <u>219530_at</u>    | PALB2              | 0.7416                           | 0.000172       |
| <u>221987_s_at</u>  | TSR1               | 0.7416                           | 0.000107       |
| <u>200093_s_at</u>  | HINT1              | 0.7423                           | 0.000795       |
| <u>201446_s_at</u>  | TIA1               | 0.7424                           | 0.000267       |
| <u>201771_at</u>    | SCAMP3             | 0.7425                           | 0.000087       |
| <u>204241_at</u>    | ACOX3              | 0.7426                           | 0.000734       |
| <u>209009_at</u>    | ESD                | 0.7426                           | 0.000392       |
| <u>234937_x_at</u>  | ZFP28              | 0.7427                           | 4.79E-05       |
| <u>201175_at</u>    | TMX2               | 0.7428                           | 2.97E-05       |
| <u>201607_at</u>    | PWP1               | 0.7429                           | 6.97E-05       |
| <u>221699_s_at</u>  | DDX50              | 0.7429                           | 0.000131       |
| <u>219418_at</u>    | NHEJ1              | 0.7430                           | 1.36E-05       |
| <u>203582_s_at</u>  | RAB4A              | 0.7431                           | 0.00053        |
| <u>225103_at</u>    |                    | 0.7434                           | 0.000559       |
| <u>222665_at</u>    | FAM82B             | 0.7435                           | 0.000378       |
| <u>233827_s_at</u>  | SUPT16H            | 0.7436                           | 0.00053        |
| <u>222611_s_at</u>  | PSPC1              | 0.7437                           | 0.000257       |
| <u>1564662_at</u>   | ZNF852             | 0.7437                           | 0.000624       |
| <u>202004_x_at</u>  | SDHC               | 0.7438                           | 0.000236       |
| <u>231824_at</u>    | LARP1B             | 0.7438                           | 8.01E-05       |
| <u>219487_at</u>    | BBS10              | 0.7439                           | 3.27E-05       |
| <u>242247_at</u>    | METT5D1            | 0.7443                           | 0.000146       |
| <u>203176_s_at</u>  | TFAM               | 0.7444                           | 0.000908       |
| <u>203283_s_at</u>  | HS2ST1             | 0.7445                           | 0.000113       |
| <u>63009_at</u>     | SHQ1               | 0.7451                           | 0.000308       |
| <u>222132_s_at</u>  | AGK                | 0.7453                           | 7.40E-06       |
| <u>217981_s_at</u>  | FXC1               | 0.7454                           | 0.000405       |
| <u>211323_s_at</u>  | ITPR1              | 0.7454                           | 0.000274       |
| <u>210768_x_at</u>  | TMCO1              | 0.7459                           | 0.000162       |
| <u>218250_s_at</u>  | CNOT7              | 0.7463                           | 0.000242       |
| <u>240528_s_at</u>  | EXOC4              | 0.7466                           | 0.000281       |
| <u>220083_x_at</u>  | UCHL5              | 0.7468                           | 0.0006         |
| <u>201815_s_at</u>  | TBC1D5             | 0.7469                           | 0.000288       |

| <b>Probe set</b>    | <b>Gene Symbol</b> | <b>Fold-change:<br/>Low/High</b> | <b>P-value</b> |
|---------------------|--------------------|----------------------------------|----------------|
| <u>203269 at</u>    | NSMAF              | 0.7469                           | 0.000612       |
| <u>200009 at</u>    | GDI2               | 0.7470                           | 0.000897       |
| <u>239792 at</u>    | LOC440288          | 0.7470                           | 0.000722       |
| <u>214167 s at</u>  |                    | 0.7470                           | 0.000109       |
| <u>215691 x at</u>  | HSPB11             | 0.7471                           | 0.000505       |
| <u>218670 at</u>    | PUS1               | 0.7477                           | 0.000982       |
| <u>213864 s at</u>  | NAP1L1             | 0.7477                           | 0.000694       |
| <u>204185 x at</u>  | PPID               | 0.7478                           | 0.000911       |
| <u>218991 at</u>    | HEATR6             | 0.7479                           | 0.000791       |
| <u>225249 at</u>    | SPPL2B             | 0.7480                           | 0.000707       |
| <u>244531 at</u>    | NNT                | 0.7483                           | 0.000409       |
| <u>202306 at</u>    | POLR2G             | 0.7486                           | 0.000149       |
| <u>210813 s at</u>  | XRCC4              | 0.7498                           | 0.000769       |
| <u>204666 s at</u>  | SIKE1              | 0.7499                           | 0.000121       |
| <u>208907 s at</u>  | MRPS18B            | 0.7500                           | 0.000719       |
| <u>223098 s at</u>  | LONP2              | 0.7502                           | 0.000229       |
| <u>211595 s at</u>  | MRPS11             | 0.7502                           | 0.000608       |
| <u>205634 x at</u>  |                    | 0.7507                           | 0.000522       |
| <u>211759 x at</u>  | TBCB               | 0.7509                           | 0.000345       |
| <u>213036 x at</u>  | ATP2A3             | 0.7513                           | 0.00065        |
| <u>201128 s at</u>  | ACLY               | 0.7513                           | 0.000254       |
| <u>203253 s at</u>  | HISPPD1            | 0.7514                           | 0.000616       |
| <u>217496 s at</u>  | IDE                | 0.7514                           | 0.000056       |
| <u>216411 s at</u>  |                    | 0.7518                           | 0.000837       |
| <u>226295 at</u>    | ITFG2              | 0.7519                           | 0.000827       |
| <u>227873 at</u>    | TXNDC15            | 0.7520                           | 0.000903       |
| <u>238677 at</u>    | WDR36              | 0.7521                           | 0.00018        |
| <u>1556151 at</u>   | ITFG1              | 0.7524                           | 0.000854       |
| <u>202757 at</u>    | COBRA1             | 0.7526                           | 0.000931       |
| <u>203225 s at</u>  | RFK                | 0.7526                           | 0.000107       |
| <u>37549 g at</u>   | BBS9               | 0.7528                           | 0.000836       |
| <u>1555974 a at</u> |                    | 0.7528                           | 0.000924       |
| <u>220647 s at</u>  | CHCHD8             | 0.7530                           | 0.000867       |
| <u>228743 at</u>    | TXNDC17            | 0.7531                           | 0.000564       |
| <u>203165 s at</u>  | SLC33A1            | 0.7531                           | 0.000538       |
| <u>210250 x at</u>  | ADSL               | 0.7532                           | 0.000469       |
| <u>201727 s at</u>  | ELAVL1             | 0.7533                           | 0.00062        |
| <u>226024 at</u>    | COMMD1             | 0.7540                           | 0.000327       |
| <u>213738 s at</u>  | ATP5A1             | 0.7540                           | 3.11E-05       |
| <u>209511 at</u>    | POLR2F             | 0.7541                           | 0.00056        |
| <u>225317 at</u>    | ACBD6              | 0.7541                           | 0.000516       |
| <u>224302 s at</u>  | MRPS36             | 0.7542                           | 9.82E-05       |
| <u>212035 s at</u>  | EXOC7              | 0.7546                           | 0.000357       |
| <u>203565 s at</u>  | MNAT1              | 0.7546                           | 0.000906       |
| <u>226696 at</u>    | RBBP9              | 0.7549                           | 0.000177       |
| <u>208752 x at</u>  | NAP1L1             | 0.7550                           | 0.000555       |
| <u>213366 x at</u>  | ATP5C1             | 0.7554                           | 0.000429       |
| <u>225638 at</u>    | C1orf31            | 0.7554                           | 0.000426       |

| <b>Probe set</b>    | <b>Gene Symbol</b> | <b>Fold-change:<br/>Low/High</b> | <b>P-value</b> |
|---------------------|--------------------|----------------------------------|----------------|
| <u>211973 at</u>    |                    | 0.7556                           | 0.000797       |
| <u>204979 s at</u>  | SH3BGR             | 0.7559                           | 0.000642       |
| <u>216883 x at</u>  | PDE6D              | 0.7561                           | 0.000596       |
| <u>218203 at</u>    | ALG5               | 0.7564                           | 7.66E-05       |
| <u>225088 at</u>    | C16orf63           | 0.7565                           | 0.000536       |
| <u>205761 s at</u>  | DUS4L              | 0.7567                           | 0.000446       |
| <u>212896 at</u>    | SKIV2L2            | 0.7567                           | 0.000394       |
| <u>232589 at</u>    |                    | 0.7568                           | 0.000568       |
| <u>218316 at</u>    | TIMM9              | 0.7569                           | 0.000619       |
| <u>1552306 at</u>   | ALG10              | 0.7571                           | 0.000225       |
| <u>208826 x at</u>  | HINT1              | 0.7578                           | 0.000923       |
| <u>209853 s at</u>  | PSME3              | 0.7582                           | 0.000856       |
| <u>214756 x at</u>  | PMS2L1             | 0.7582                           | 0.000219       |
| <u>219576 at</u>    | MAP7D3             | 0.7582                           | 0.000412       |
| <u>207438 s at</u>  | SNUPN              | 0.7590                           | 0.000818       |
| <u>226243 at</u>    | C2orf79            | 0.7595                           | 0.000782       |
| <u>225244 at</u>    | SNAP47             | 0.7601                           | 0.000617       |
| <u>207508 at</u>    | ATP5G3             | 0.7608                           | 0.000706       |
| <u>225614 at</u>    | SAAL1              | 0.7609                           | 0.000111       |
| <u>222555 s at</u>  | MRPL44             | 0.7613                           | 0.000252       |
| <u>241682 at</u>    | KLHL23             | 0.7615                           | 0.000762       |
| <u>238578 at</u>    | TMEM182            | 0.7620                           | 0.000204       |
| <u>225584 at</u>    |                    | 0.7622                           | 0.000537       |
| <u>225908 at</u>    | IAH1               | 0.7625                           | 8.83E-05       |
| <u>210573 s at</u>  | POLR3C             | 0.7626                           | 0.00083        |
| <u>224936 at</u>    | EIF2S3             | 0.7631                           | 0.000882       |
| <u>226457 at</u>    |                    | 0.7634                           | 0.000687       |
| <u>201007 at</u>    | HADHB              | 0.7635                           | 0.000123       |
| <u>229984 at</u>    | DTWD1              | 0.7635                           | 0.000576       |
| <u>200068 s at</u>  | CANX               | 0.7638                           | 0.000655       |
| <u>219988 s at</u>  | RNF220             | 0.7645                           | 0.000595       |
| <u>218213 s at</u>  | C11orf10           | 0.7646                           | 0.000753       |
| <u>230678 at</u>    | RGS5               | 0.7647                           | 0.000344       |
| <u>212329 at</u>    | SCAP               | 0.7648                           | 0.000595       |
| <u>238297 at</u>    |                    | 0.7652                           | 0.000658       |
| <u>207243 s at</u>  | CALM2              | 0.7654                           | 0.000274       |
| <u>212720 at</u>    | PAPOLA             | 0.7656                           | 0.000955       |
| <u>235628 x at</u>  | FLJ33630           | 0.7658                           | 0.00086        |
| <u>201804 x at</u>  | TBCB               | 0.7662                           | 0.000904       |
| <u>216958 s at</u>  | IVD                | 0.7665                           | 0.000236       |
| <u>228578 at</u>    | RBM45              | 0.7668                           | 0.000246       |
| <u>214047 s at</u>  | MBD4               | 0.7668                           | 0.000504       |
| <u>201659 s at</u>  | ARL1               | 0.7670                           | 0.000433       |
| <u>203361 s at</u>  | MYCBP              | 0.7670                           | 0.000185       |
| <u>211392 s at</u>  | PATZ1              | 0.7672                           | 0.000617       |
| <u>222588 s at</u>  | C11orf57           | 0.7674                           | 0.000486       |
| <u>209394 at</u>    | ASMTL              | 0.7674                           | 0.000587       |
| <u>1555679 a at</u> | RTN4IP1            | 0.7677                           | 0.000362       |

| <b>Probe set</b>    | <b>Gene Symbol</b> | <b>Fold-change:<br/>Low/High</b> | <b>P-value</b> |
|---------------------|--------------------|----------------------------------|----------------|
| <u>235031 at</u>    |                    | 0.7679                           | 0.000838       |
| <u>217920 at</u>    | MAN1A2             | 0.7682                           | 0.000442       |
| <u>219133 at</u>    | OXSM               | 0.7687                           | 0.000617       |
| <u>223191 at</u>    | COX16              | 0.7691                           | 0.000833       |
| <u>239790 s at</u>  |                    | 0.7691                           | 0.000351       |
| <u>1555902 at</u>   | ARMCX5             | 0.7691                           | 0.000983       |
| <u>217874 at</u>    | SUCLG1             | 0.7692                           | 0.00086        |
| <u>223197 s at</u>  | SMARCAD1           | 0.7692                           | 0.00099        |
| <u>228199 at</u>    | LOC729234          | 0.7693                           | 0.000143       |
| <u>229075 at</u>    | SPATA5             | 0.7696                           | 0.000554       |
| <u>241823 at</u>    |                    | 0.7700                           | 0.000329       |
| <u>219030 at</u>    | TPRKB              | 0.7700                           | 3.61E-05       |
| <u>219329 s at</u>  | C2orf28            | 0.7704                           | 0.000892       |
| <u>210290 at</u>    | ZNF174             | 0.7705                           | 7.39E-05       |
| <u>209965 s at</u>  | RAD51L3            | 0.7705                           | 0.00043        |
| <u>238014 at</u>    | TMEM194B           | 0.7708                           | 0.000368       |
| <u>200054 at</u>    | ZNF259             | 0.7709                           | 0.000131       |
| <u>200705 s at</u>  | EEF1B2             | 0.7712                           | 0.000298       |
| <u>1569366 a at</u> | ZNF569             | 0.7714                           | 6.01E-05       |
| <u>233268 s at</u>  |                    | 0.7716                           | 0.000593       |
| <u>222360 at</u>    | DPH5               | 0.7716                           | 0.000658       |
| <u>213203 at</u>    | SNAPC5             | 0.7717                           | 0.000682       |
| <u>230848 s at</u>  | MGA                | 0.7718                           | 0.000669       |
| <u>1554465 s at</u> |                    | 0.7721                           | 8.91E-05       |
| <u>222014 x at</u>  | MTO1               | 0.7721                           | 0.000585       |
| <u>236994 at</u>    | FBXL4              | 0.7721                           | 0.000404       |
| <u>217485 x at</u>  | PMS2L1             | 0.7722                           | 0.000201       |
| <u>243815 at</u>    | PGBD4              | 0.7726                           | 0.000407       |
| <u>212544 at</u>    | ZNHIT3             | 0.7728                           | 0.000379       |
| <u>218890 x at</u>  | MRPL35             | 0.7732                           | 0.000931       |
| <u>223219 s at</u>  | CNOT10             | 0.7735                           | 0.000121       |
| <u>218533 s at</u>  | UCKL1              | 0.7736                           | 0.000936       |
| <u>220128 s at</u>  | NIPAL2             | 0.7740                           | 0.000764       |
| <u>200955 at</u>    | IMMT               | 0.7740                           | 0.000943       |
| <u>219770 at</u>    | GTDC1              | 0.7748                           | 0.000452       |
| <u>224714 at</u>    | MKI67IP            | 0.7751                           | 0.000491       |
| <u>202615 at</u>    | GNAQ               | 0.7752                           | 0.000834       |
| <u>200063 s at</u>  | NPM1               | 0.7754                           | 0.000474       |
| <u>202358 s at</u>  | SNX19              | 0.7755                           | 0.000889       |
| <u>225737 s at</u>  | FBXO22             | 0.7758                           | 0.000176       |
| <u>218982 s at</u>  |                    | 0.7762                           | 0.000703       |
| <u>224723 x at</u>  | LOC401397          | 0.7765                           | 0.000744       |
| <u>219485 s at</u>  | PSMD10             | 0.7768                           | 0.00047        |
| <u>217956 s at</u>  | ENOPH1             | 0.7771                           | 0.000641       |
| <u>222510 s at</u>  | MKRN2              | 0.7772                           | 0.000515       |
| <u>209196 at</u>    | WDR46              | 0.7773                           | 0.000592       |
| <u>212026 s at</u>  | EXOC7              | 0.7777                           | 0.000463       |
| <u>227903 x at</u>  | C19orf20           | 0.7777                           | 0.00077        |

| <b>Probe set</b>    | <b>Gene Symbol</b> | <b>Fold-change:<br/>Low/High</b> | <b>P-value</b> |
|---------------------|--------------------|----------------------------------|----------------|
| <u>215985 at</u>    |                    | 0.7785                           | 0.000947       |
| <u>223355 at</u>    | ALG1               | 0.7787                           | 0.000956       |
| <u>223334 at</u>    | TMEM126A           | 0.7787                           | 0.000962       |
| <u>226815 at</u>    | C3orf31            | 0.7789                           | 0.000154       |
| <u>203871 at</u>    | SENP3              | 0.7791                           | 0.000627       |
| <u>243529 at</u>    | MARS2              | 0.7795                           | 0.000744       |
| <u>211426 x at</u>  | GNAQ               | 0.7797                           | 0.000312       |
| <u>1554019 s at</u> | C6orf182           | 0.7804                           | 0.000237       |
| <u>203715 at</u>    | TBCE               | 0.7815                           | 0.000678       |
| <u>216843 x at</u>  | PMS2L1             | 0.7815                           | 0.000728       |
| <u>202417 at</u>    | KEAP1              | 0.7824                           | 0.000262       |
| <u>1553940 a at</u> | LRRC28             | 0.7825                           | 0.000255       |
| <u>209580 s at</u>  | MBD4               | 0.7829                           | 0.000989       |
| <u>210211 s at</u>  | HSP90AA1           | 0.7829                           | 0.000674       |
| <u>201239 s at</u>  |                    | 0.7832                           | 0.000538       |
| <u>224824 at</u>    | FAM36A             | 0.7832                           | 8.05E-05       |
| <u>223277 at</u>    | C3orf75            | 0.7833                           | 0.000673       |
| <u>219590 x at</u>  | DPH5               | 0.7834                           | 0.000721       |
| <u>1555702 a at</u> | ST3GAL3            | 0.7834                           | 0.000932       |
| <u>227839 at</u>    | MBD5               | 0.7843                           | 0.000385       |
| <u>206308 at</u>    | TRDMT1             | 0.7845                           | 0.00055        |
| <u>202167 s at</u>  | MMS19              | 0.7862                           | 0.000413       |
| <u>1554885 a at</u> | PRIM2              | 0.7862                           | 0.000472       |
| <u>48825 at</u>     | ING4               | 0.7865                           | 0.000806       |
| <u>214738 s at</u>  | NEK9               | 0.7868                           | 0.000928       |
| <u>224805 s at</u>  | C15orf17           | 0.7877                           | 0.000803       |
| <u>203328 x at</u>  | IDE                | 0.7881                           | 0.000252       |
| <u>218049 s at</u>  | MRPL13             | 0.7882                           | 0.000446       |
| <u>223021 x at</u>  | VTA1               | 0.7901                           | 0.000922       |
| <u>203091 at</u>    | FUBP1              | 0.7910                           | 0.000959       |
| <u>204699 s at</u>  | C1orf107           | 0.7929                           | 0.000771       |
| <u>217604 at</u>    |                    | 0.7936                           | 0.000497       |
| <u>238490 at</u>    | KIAA2026           | 0.7939                           | 0.000718       |
| <u>211212 s at</u>  | ORC5L              | 0.7941                           | 0.00056        |
| <u>212422 at</u>    | PDCD11             | 0.7949                           | 0.000577       |
| <u>236240 at</u>    | C4orf29            | 0.7962                           | 0.000177       |
| <u>1553726 s at</u> | C6orf170           | 0.7967                           | 0.000788       |
| <u>220176 at</u>    | NUBPL              | 0.7970                           | 0.00079        |
| <u>218869 at</u>    | MLYCD              | 0.7977                           | 0.000921       |
| <u>1554577 a at</u> | PSMD10             | 0.7980                           | 0.000301       |
| <u>200723 s at</u>  | CAPRN1             | 0.7982                           | 0.000865       |
| <u>242515 x at</u>  | C11orf17           | 0.7987                           | 0.000859       |
| <u>208739 x at</u>  | SUMO2              | 0.8018                           | 0.000499       |
| <u>224474 x at</u>  | SMEK2              | 0.8042                           | 0.000257       |
| <u>207654 x at</u>  | DR1                | 0.8044                           | 0.000847       |
| <u>233013 x at</u>  | LOC220906          | 0.8045                           | 0.000469       |
| <u>1553158 at</u>   | C3orf34            | 0.8048                           | 0.000744       |
| <u>223010 s at</u>  | OCIAD1             | 0.8049                           | 0.00042        |

| <b>Probe set</b>    | <b>Gene Symbol</b> | <b>Fold-change:<br/>Low/High</b> | <b>P-value</b> |
|---------------------|--------------------|----------------------------------|----------------|
| <u>222918 at</u>    | RAB9B              | 0.8051                           | 0.000388       |
| <u>205763 s at</u>  | DDX18              | 0.8054                           | 0.000973       |
| <u>223436 s at</u>  | TRPT1              | 0.8060                           | 0.000533       |
| <u>1554321 a at</u> | NFS1               | 0.8118                           | 0.00083        |
| <u>206001 at</u>    | NPY                | 1.1981                           | 0.000972       |
| <u>225287 s at</u>  | TMEM55B            | 1.2193                           | 0.00049        |
| <u>217535 at</u>    | FAM49B             | 1.2267                           | 0.000244       |
| <u>214294 at</u>    | KIAA0485           | 1.2337                           | 0.000805       |
| <u>212822 at</u>    | HEG1               | 1.2432                           | 0.000481       |
| <u>221417 x at</u>  | S1PR5              | 1.2459                           | 0.00065        |
| <u>40020 at</u>     | CELSR3             | 1.2489                           | 0.000636       |
| <u>241930 x at</u>  | LOC442113          | 1.2493                           | 0.000751       |
| <u>232919 at</u>    | AFG3L2             | 1.2523                           | 0.000796       |
| <u>226871 s at</u>  | ATG4D              | 1.2525                           | 0.000994       |
| <u>211410 x at</u>  | KIR2DL5A           | 1.2548                           | 0.000843       |
| <u>216537 s at</u>  | SIGLEC7            | 1.2555                           | 0.000506       |
| <u>208203 x at</u>  | KIR2DS5            | 1.2571                           | 0.000296       |
| <u>237460 x at</u>  | C14orf182          | 1.2636                           | 0.000427       |
| <u>235528 at</u>    | GUCA1B             | 1.2646                           | 0.000821       |
| <u>215067 x at</u>  | PRDX2              | 1.2672                           | 0.000968       |
| <u>210059 s at</u>  | MAPK13             | 1.2677                           | 0.000277       |
| <u>217646 at</u>    | SURF1              | 1.2678                           | 0.000406       |
| <u>33322 i at</u>   | SFN                | 1.2692                           | 0.000716       |
| <u>204952 at</u>    | LYPD3              | 1.2692                           | 0.000828       |
| <u>201155 s at</u>  | MFN2               | 1.2721                           | 0.000219       |
| <u>216907 x at</u>  |                    | 1.2748                           | 0.000977       |
| <u>203916 at</u>    | NDST2              | 1.2781                           | 0.000955       |
| <u>205494 at</u>    | ZNF821             | 1.2785                           | 0.000602       |
| <u>1562853 x at</u> |                    | 1.2787                           | 0.000159       |
| <u>212401 s at</u>  |                    | 1.2798                           | 0.000363       |
| <u>233101 at</u>    | MTMR9              | 1.2851                           | 0.000164       |
| <u>211507 s at</u>  | MTMR3              | 1.2856                           | 0.000911       |
| <u>221619 s at</u>  | MTCH1              | 1.2861                           | 0.000594       |
| <u>225271 at</u>    | TMEM63B            | 1.2871                           | 0.000594       |
| <u>207312 at</u>    | PHKG1              | 1.2879                           | 0.000797       |
| <u>229247 at</u>    | FBLN7              | 1.2945                           | 0.000152       |
| <u>201100 s at</u>  | USP9X              | 1.2961                           | 0.000836       |
| <u>214487 s at</u>  |                    | 1.2977                           | 0.000228       |
| <u>233168 s at</u>  | RP3-402G11.5       | 1.2982                           | 0.000713       |
| <u>215645 at</u>    | FLCN               | 1.3003                           | 0.000815       |
| <u>204710 s at</u>  | WIPI2              | 1.3009                           | 0.000336       |
| <u>1556654 at</u>   |                    | 1.3037                           | 0.000059       |
| <u>232579 at</u>    | LOC100134229       | 1.3065                           | 0.000605       |
| <u>215588 x at</u>  | RIOK3              | 1.3072                           | 0.000465       |
| <u>204948 s at</u>  | FST                | 1.3079                           | 0.000287       |
| <u>218945 at</u>    | C16orf68           | 1.3086                           | 0.000258       |
| <u>222160 at</u>    | AKAP8L             | 1.3113                           | 0.000116       |
| <u>234362 s at</u>  | CTLA4              | 1.3155                           | 0.000342       |

| <b>Probe set</b>    | <b>Gene Symbol</b> | <b>Fold-change:<br/>Low/High</b> | <b>P-value</b> |
|---------------------|--------------------|----------------------------------|----------------|
| <u>33323_r_at</u>   | SFN                | 1.3161                           | 0.000586       |
| <u>209222_s_at</u>  | OSBPL2             | 1.3204                           | 0.000369       |
| <u>1568915_at</u>   |                    | 1.3216                           | 0.000127       |
| <u>238888_at</u>    |                    | 1.3286                           | 0.000261       |
| <u>221812_at</u>    | FBXO42             | 1.3340                           | 0.00039        |
| <u>207840_at</u>    | CD160              | 1.3385                           | 0.000938       |
| <u>47773_at</u>     | FBXO42             | 1.3416                           | 0.000944       |
| <u>201006_at</u>    | PRDX2              | 1.3417                           | 0.000819       |
| <u>241927_x_at</u>  | CDC34              | 1.3425                           | 6.40E-06       |
| <u>232134_at</u>    |                    | 1.3439                           | 0.00017        |
| <u>224783_at</u>    | FAM100B            | 1.3449                           | 0.000966       |
| <u>224905_at</u>    | WDR26              | 1.3450                           | 0.000648       |
| <u>242749_at</u>    |                    | 1.3462                           | 0.000275       |
| <u>221490_at</u>    | UBAP1              | 1.3481                           | 0.000293       |
| <u>241239_at</u>    | EPN2               | 1.3490                           | 6.84E-05       |
| <u>1559436_x_at</u> |                    | 1.3504                           | 0.000429       |
| <u>229987_at</u>    |                    | 1.3512                           | 0.000984       |
| <u>238042_at</u>    |                    | 1.3523                           | 0.000221       |
| <u>208942_s_at</u>  | SEC62              | 1.3533                           | 0.000695       |
| <u>241001_at</u>    |                    | 1.3561                           | 0.000796       |
| <u>46270_at</u>     |                    | 1.3561                           | 0.000265       |
| <u>219186_at</u>    | ZBTB7A             | 1.3567                           | 0.00095        |
| <u>218208_at</u>    | PQLC1              | 1.3587                           | 0.000203       |
| <u>231861_at</u>    | LRP10              | 1.3601                           | 0.000483       |
| <u>238594_x_at</u>  | DUSP8              | 1.3602                           | 0.000364       |
| <u>242742_at</u>    |                    | 1.3612                           | 0.000252       |
| <u>202197_at</u>    | MTMR3              | 1.3617                           | 0.000295       |
| <u>1561015_at</u>   |                    | 1.3624                           | 0.000795       |
| <u>208707_at</u>    | EIF5               | 1.3662                           | 0.00087        |
| <u>238430_x_at</u>  | SLFN5              | 1.3677                           | 0.000092       |
| <u>223199_at</u>    | MKNK2              | 1.3693                           | 0.000991       |
| <u>213579_s_at</u>  | EP300              | 1.3718                           | 0.000713       |
| <u>204476_s_at</u>  | PC                 | 1.3728                           | 0.000185       |
| <u>202131_s_at</u>  | RIOK3              | 1.3752                           | 0.000286       |
| <u>201749_at</u>    | ECE1               | 1.3755                           | 0.000324       |
| <u>239585_at</u>    | KAT2B              | 1.3807                           | 7.41E-05       |
| <u>208866_at</u>    | CSNK1A1            | 1.3820                           | 0.00093        |
| <u>242725_at</u>    |                    | 1.3832                           | 0.000115       |
| <u>209372_x_at</u>  |                    | 1.3842                           | 0.000768       |
| <u>202130_at</u>    | RIOK3              | 1.3846                           | 0.000185       |
| <u>244777_at</u>    | DCP2               | 1.3848                           | 0.000473       |
| <u>219500_at</u>    | CLCF1              | 1.3859                           | 8.16E-05       |
| <u>236533_at</u>    | ASAP1              | 1.3863                           | 0.000842       |
| <u>231552_at</u>    |                    | 1.3871                           | 0.0004         |
| <u>232307_at</u>    |                    | 1.3927                           | 0.000976       |
| <u>1556820_a_at</u> | DLEU2              | 1.3929                           | 0.000253       |
| <u>230761_at</u>    |                    | 1.3942                           | 0.000719       |
| <u>242837_at</u>    | SFRS4              | 1.3944                           | 0.000255       |

| <b>Probe set</b>   | <b>Gene Symbol</b> | <b>Fold-change:<br/>Low/High</b> | <b>P-value</b> |
|--------------------|--------------------|----------------------------------|----------------|
| <u>223012 at</u>   | UBXN6              | 1.3945                           | 0.000727       |
| <u>232342 at</u>   | MTMR14             | 1.4086                           | 0.000109       |
| <u>232513 x at</u> | C20orf107          | 1.4094                           | 0.000113       |
| <u>239633 at</u>   |                    | 1.4102                           | 0.000648       |
| <u>244087 at</u>   |                    | 1.4125                           | 0.000336       |
| <u>1557675 at</u>  | RAF1               | 1.4132                           | 0.000937       |
| <u>225632 s at</u> | RAB43              | 1.4137                           | 0.000464       |
| <u>236908 at</u>   |                    | 1.4143                           | 0.000462       |
| <u>244408 at</u>   |                    | 1.4145                           | 0.000383       |
| <u>229996 s at</u> | PCGF5              | 1.4160                           | 0.000464       |
| <u>228866 at</u>   |                    | 1.4164                           | 0.000961       |
| <u>213300 at</u>   | ATG2A              | 1.4168                           | 0.000155       |
| <u>210598 at</u>   |                    | 1.4178                           | 0.000652       |
| <u>44146 at</u>    | GMEB2              | 1.4180                           | 4.42E-05       |
| <u>222251 s at</u> | GMEB2              | 1.4189                           | 0.000119       |
| <u>218205 s at</u> | MKNK2              | 1.4229                           | 1.62E-05       |
| <u>241865 at</u>   |                    | 1.4282                           | 0.000591       |
| <u>235553 at</u>   | GAPVD1             | 1.4283                           | 3.98E-05       |
| <u>237097 at</u>   |                    | 1.4304                           | 0.000155       |
| <u>212356 at</u>   | KIAA0323           | 1.4392                           | 0.000449       |
| <u>240451 at</u>   |                    | 1.4392                           | 0.000181       |
| <u>231776 at</u>   | EOMES              | 1.4403                           | 0.000385       |
| <u>205255 x at</u> | TCF7               | 1.4403                           | 4.59E-05       |
| <u>212540 at</u>   | CDC34              | 1.4418                           | 0.00074        |
| <u>227201 at</u>   | LOC643837          | 1.4424                           | 0.000559       |
| <u>224897 at</u>   | WDR26              | 1.4429                           | 0.000131       |
| <u>233728 at</u>   |                    | 1.4441                           | 0.000401       |
| <u>239166 at</u>   |                    | 1.4564                           | 0.000361       |
| <u>209270 at</u>   | LAMB3              | 1.4568                           | 0.0004         |
| <u>227886 at</u>   | CTSD               | 1.4576                           | 0.000749       |
| <u>232910 at</u>   | NCRNA00081         | 1.4614                           | 1.56E-05       |
| <u>205377 s at</u> | ACHE               | 1.4614                           | 0.000904       |
| <u>233308 at</u>   | COPB1              | 1.4629                           | 0.000266       |
| <u>208868 s at</u> | GABARAPL1          | 1.4650                           | 0.000975       |
| <u>228967 at</u>   | EIF1               | 1.4688                           | 0.000202       |
| <u>203464 s at</u> | EPN2               | 1.4719                           | 3.80E-06       |
| <u>218603 at</u>   | HECA               | 1.4755                           | 0.000783       |
| <u>224889 at</u>   | FOXO3              | 1.4776                           | 0.000555       |
| <u>230529 at</u>   | HECA               | 1.4816                           | 3.91E-05       |
| <u>213343 s at</u> | GDPD5              | 1.4825                           | 0.000454       |
| <u>242829 x at</u> | FBXL3              | 1.4857                           | 0.000989       |
| <u>207460 at</u>   | GZMM               | 1.4967                           | 0.000297       |
| <u>204131 s at</u> | FOXO3              | 1.4973                           | 0.000497       |
| <u>233691 at</u>   |                    | 1.4985                           | 0.000378       |
| <u>238360 s at</u> |                    | 1.5002                           | 0.000473       |
| <u>233360 at</u>   | UBE2I              | 1.5066                           | 0.000669       |
| <u>236379 at</u>   |                    | 1.5084                           | 0.000716       |
| <u>1561130 at</u>  | C12orf51           | 1.5089                           | 0.000702       |



| <b>Probe set</b>    | <b>Gene Symbol</b> | <b>Fold-change:<br/>Low/High</b> | <b>P-value</b> |
|---------------------|--------------------|----------------------------------|----------------|
| <u>238378 at</u>    |                    | 1.5100                           | 0.000336       |
| <u>1563076 x at</u> |                    | 1.5111                           | 0.000532       |
| <u>206571 s at</u>  | MAP4K4             | 1.5187                           | 0.000516       |
| <u>225005 at</u>    | PHF13              | 1.5188                           | 0.000917       |
| <u>228674 s at</u>  | EML4               | 1.5233                           | 0.00042        |
| <u>230464 at</u>    | S1PR5              | 1.5241                           | 0.000855       |
| <u>212441 at</u>    | KIAA0232           | 1.5267                           | 1.99E-05       |
| <u>235983 at</u>    |                    | 1.5275                           | 0.000516       |
| <u>35776 at</u>     | ITSN1              | 1.5318                           | 0.000521       |
| <u>243286 at</u>    |                    | 1.5328                           | 0.000573       |
| <u>208901 s at</u>  | TOP1               | 1.5395                           | 6.00E-07       |
| <u>230961 at</u>    |                    | 1.5408                           | 0.000789       |
| <u>208900 s at</u>  | TOP1               | 1.5537                           | 1.27E-05       |
| <u>204180 s at</u>  | ZBTB43             | 1.5588                           | 0.000943       |
| <u>202492 at</u>    | ATG9A              | 1.5592                           | 5.37E-05       |
| <u>233359 at</u>    |                    | 1.5639                           | 1.39E-05       |
| <u>211458 s at</u>  |                    | 1.5687                           | 0.000487       |
| <u>1557543 at</u>   |                    | 1.5754                           | 0.000586       |
| <u>213958 at</u>    | CD6                | 1.5841                           | 0.000853       |
| <u>203936 s at</u>  | MMP9               | 1.5859                           | 0.000135       |
| <u>215592 at</u>    |                    | 1.5900                           | 0.000144       |
| <u>204181 s at</u>  | ZBTB43             | 1.5934                           | 0.000252       |
| <u>1559101 at</u>   | FYN                | 1.5976                           | 6.35E-05       |
| <u>217799 x at</u>  | UBE2H              | 1.5990                           | 0.00044        |
| <u>32502 at</u>     | GDPD5              | 1.5990                           | 0.000156       |
| <u>217748 at</u>    | ADIPOR1            | 1.6092                           | 0.000115       |
| <u>236755 at</u>    | TBC1D23            | 1.6125                           | 0.000204       |
| <u>243675 at</u>    |                    | 1.6309                           | 0.000275       |
| <u>218032 at</u>    | SNN                | 1.6391                           | 0.000568       |
| <u>206374 at</u>    | DUSP8              | 1.6675                           | 0.000292       |
| <u>202364 at</u>    | MXI1               | 1.6722                           | 0.000174       |
| <u>202426 s at</u>  | RXRA               | 1.6730                           | 0.000486       |
| <u>1558299 at</u>   |                    | 1.6871                           | 0.000724       |
| <u>238769 at</u>    |                    | 1.6891                           | 0.000563       |
| <u>236248 x at</u>  | TADA2B             | 1.7011                           | 0.000342       |
| <u>240410 at</u>    |                    | 1.7056                           | 0.000402       |
| <u>239845 at</u>    |                    | 1.7177                           | 2.84E-05       |
| <u>231205 at</u>    |                    | 1.7210                           | 1.25E-05       |
| <u>1560031 at</u>   | FRMD4A             | 1.7265                           | 0.000825       |
| <u>240347 at</u>    |                    | 1.7275                           | 0.000204       |
| <u>227867 at</u>    | LOC129293          | 1.7348                           | 1.29E-05       |
| <u>222420 s at</u>  | UBE2H              | 1.7447                           | 0.000211       |
| <u>237082 at</u>    |                    | 1.7558                           | 0.000365       |
| <u>225239 at</u>    |                    | 1.7737                           | 0.000477       |
| <u>226561 at</u>    | AGFG1              | 1.7743                           | 0.000423       |
| <u>204731 at</u>    | TGFBR3             | 1.7756                           | 0.000658       |
| <u>203413 at</u>    | NELL2              | 1.7780                           | 0.00077        |
| <u>222747 s at</u>  | SCML1              | 1.7799                           | 0.000498       |

| <b>Probe set</b>    | <b>Gene Symbol</b> | <b>Fold-change:<br/>Low/High</b> | <b>P-value</b> |
|---------------------|--------------------|----------------------------------|----------------|
| <u>232744_x_at</u>  |                    | 1.7949                           | 0.000542       |
| <u>203827_at</u>    | WIPI1              | 1.8015                           | 0.000236       |
| <u>243404_at</u>    |                    | 1.8149                           | 2.11E-05       |
| <u>1564150_a_at</u> | LOC256021          | 1.8232                           | 0.000905       |
| <u>243509_at</u>    |                    | 1.8395                           | 5.28E-05       |
| <u>209345_s_at</u>  | PI4K2A             | 1.8426                           | 0.000399       |
| <u>224829_at</u>    | CPEB4              | 1.8548                           | 0.000034       |
| <u>235652_at</u>    |                    | 1.8549                           | 0.00094        |
| <u>1556385_at</u>   |                    | 1.8898                           | 5.47E-05       |
| <u>218978_s_at</u>  | SLC25A37           | 1.8908                           | 0.000832       |
| <u>243006_at</u>    |                    | 1.9030                           | 0.000392       |
| <u>231911_at</u>    | ERMN               | 1.9752                           | 0.000826       |
| <u>228361_at</u>    | E2F2               | 1.9968                           | 0.000576       |
| <u>221778_at</u>    | JHDM1D             | 2.0076                           | 0.000105       |
| <u>233289_at</u>    |                    | 2.0089                           | 2.00E-07       |
| <u>226679_at</u>    | SLC26A11           | 2.0169                           | 0.000807       |
| <u>243546_at</u>    |                    | 2.0454                           | 0.000114       |
| <u>210031_at</u>    | CD247              | 2.0647                           | 0.000108       |
| <u>223028_s_at</u>  | SNX9               | 2.1920                           | 0.000508       |
| <u>223027_at</u>    | SNX9               | 2.2178                           | 0.000372       |
